# Supplementary material for: R-spondins engage heparan sulfate proteoglycans to potentiate WNT signaling
Source: eLife. 2020 May 20;9:e54469. doi: 10.7554/eLife.54469 (PMC7239654; doi:10.7554/eLife.54469)
Supplement: Supplementary file 2. — The names and sequences of pairs of oligonucleotides encoding sgRNAs (which were cloned into pX458-mCherry) are shown in the first and second columns, respectively. The names and sequences of pairs of PCR primers used to amplify corresponding genomic regions flanking sgRNA target sites are shown in the third and fourth columns, respectively. The names and sequences of primers used to sequence the amplified target sites are shown in the fifth and sixth columns, respectively. [file elife-54469-supp2.xlsx]

## Sheet: Sheet1
CRISPR guide oligonucleotides	Sequence (5'-3')	Primers for amplifying genomic sequence conataining target site	Sequence (5'-3')	Primer for sequencing target site	Sequence (5'-3')
GPC3_sgRNA_Ex3I_A	CAC CGC TGT GGC GGT TAC TGC AAT G	GPC3_Ex3_For	TTG TTC GCC ATG CCA AGA AC	GPC3_Ex3_Seq	CTA CCC AAG CCT GAC TCC AC
GPC3_sgRNA_Ex3I_B	AAA CCA TTG CAG TAA CCG CCA CAG C	GPC3_Ex3_Rev	CTC ACC CCA ATA AGG CCC AA
GPC4_sgRNA_Ex3III_A	CAC CGA GAG TTG AAA CGT TAC TAC G	GPC4_Ex3_For	TGA CTC CTG AGA AGC TGT TGG	GPC4_Ex3_SeqII	ACA AAA CAG AGA AGA CAA GGA GT
GPC4_sgRNA_Ex3III_B	AAA CCG TAG TAA CGT TTC AAC TCT C	GPC4_Ex3_Rev	CAA CCA AAT GTG GAG CCT GTG
