# Supplementary material for: R-spondins engage heparan sulfate proteoglycans to potentiate WNT signaling
Source: eLife. 2020 May 20;9:e54469. doi: 10.7554/eLife.54469 (PMC7239654; doi:10.7554/eLife.54469)
Supplement: Supplementary file 3. — Clonal cell lines derived from HAP1-7TGP in which multiple genes were targeted using CRISPR/Cas9 (see Materials and methods) are described. The ‘Cell Line Name’ column indicates the generic name used throughout the manuscript to describe the genotype and the ‘Clone #' column identifies the individual clone used. The figures in which each clone was used are also indicated. The ‘CRISPR guide’ column indicates the name of the guide or guides used, which is the same as that of the oligonucleotides encoding sgRNAs (see Materials and methods and Supplementary file 2). The ‘Genomic Sequence’ column shows 80 nucleotides of genomic sequence (5’ relative to the gene is to the left) surrounding the target site; when two adjacent sites within the same gene were targeted, 80 nucleotides of genomic sequence surrounding each target site are shown and the number of intervening bp that are not shown between the two sites is indicated in parenthesis. Each cell line made using a different set of CRISPR guides is separated by a horizontal spacer, under which the reference (WT) genomic sequence (obtained from RefSeq) targeted by each CRISPR guide is indicated. Within this reference genomic sequence, the guide sequence is colored blue and the site of the double strand cut made by Cas9 is between the two underlined bases. Sequencing results for individual mutant clones are indicated below the reference sequence. Mutated, inserted or deleted nucleotides are colored red (dashes represent deleted nucleotides and ellipses are used to indicate that a deletion continues beyond the 80 nucleotides of sequence shown) and the nature of the mutation, the resulting genotype and any pertinent observations are also described. The CRISPR guide or guides used to target different genes, as well as the genomic sequence, mutation, genotype and observations pertaining to each of the targeted genes are designated ‘1’, ‘2’, ‘3’ and ‘4’ in the column headings and are shown under horizontal spacers of different [file elife-54469-supp3.xlsx]

## Sheet: Multiple-mutant clones
Cell Line Name	Clone #	Figures	CRISPR Guide 1	Genomic Sequence 1	Mutation 1	Genotype 1	Observations 1	CRISPR Guide 2	Genomic Sequence 2	Mutation 2	Genotype 2	Observations 2	CRISPR Guide 3	Genomic Sequence 3	Mutation 3	Genotype 3	Observations 3	CRISPR Guide 4	Genomic Sequence 4	Mutation 4	Genotype 4	Observations 4
Reference			LGR4_sgRNA_Ex1	GCGAGCAGCGCCGCGGGAGAGGCCGGCGCGGGAGGCGGCCGCAGCAATGCCGGGCCCGCTAGGGCTGCTCTGCTTCCTCG				LGR5_sgRNA_Ex16; LGR5_sgRNA_Ex17	AAGGGTTATAGAAATGCCTTATGCTTACCAGTGCTGTGCATTTGGAGTGTGTGAGAATGCCTATAAGATTTCTAATCAAT(2125bp) TGCTTGACTTTGAGGAAGACCTGAAAGCCCTTCATTCAGTGCAGTGTTCACCTTCCCCAGGTGAGAAAGGCATCAAAAAT				LGR6_sgRNA_Ex8	GGGGGTTCCATAACAACAACATCAAGGCCATCCCAGAAAAGGCCTTCATGGGGAACCCTCTGCTACAGACGATGTGAGTA				GPC3_sgRNA_Ex3I	TTACTGCCAGGGACTGATGATGGTTAAACCCTGTGGCGGTTACTGCAATGTGGTCATGCAAGGCTGTATGGCAGGTGTGG
LGR4/5/6KO; GPC3KO	4	3F, 3G	LGR4_sgRNA_Ex1	GCGAGCAGCGCCGCGGGAGAGGCCGGCGCGGGAGGCGGCCGCAGCAA---------CGCTAGGGCTGCTCTGCTTCCTCG	9 bp deletion	start codon mutated from ATG (Met) to ACG (Thr)		LGR5_sgRNA_Ex16; LGR5_sgRNA_Ex17	AAGGGTTATAGAAATGCCTTATGCTTACCAGTG-----------------------------------------------------------... ---------------------------------ATTCAGTGCAGTGTTCACCTTCCCCAGGTGAGAAAGGCATCAAAAAT	2205 bp deletion	frameshift	PCR product is visibly smaller	LGR6_sgRNA_Ex8	GGGGGTTCCATAACAACAACATCAAGGCCATCCCAGAAAAGGCCTTCCATGGGGAACCCTCTGCTACAGACGATGTGAGTA	1 bp insertion	frameshift		GPC3_sgRNA_Ex3I	TTACTGCCAGGGACTGATGATGGTTAAACCCTGTGGCGGTTACTGCAAATGTGGTCATGCAAGGCTGTATGGCAGGTGTGG	1 bp insertion	frameshift
Reference			LGR4_sgRNA_Ex1	GCGAGCAGCGCCGCGGGAGAGGCCGGCGCGGGAGGCGGCCGCAGCAATGCCGGGCCCGCTAGGGCTGCTCTGCTTCCTCG				LGR5_sgRNA_Ex16; LGR5_sgRNA_Ex17	AAGGGTTATAGAAATGCCTTATGCTTACCAGTGCTGTGCATTTGGAGTGTGTGAGAATGCCTATAAGATTTCTAATCAAT(2125bp) TGCTTGACTTTGAGGAAGACCTGAAAGCCCTTCATTCAGTGCAGTGTTCACCTTCCCCAGGTGAGAAAGGCATCAAAAAT				LGR6_sgRNA_Ex8	GGGGGTTCCATAACAACAACATCAAGGCCATCCCAGAAAAGGCCTTCATGGGGAACCCTCTGCTACAGACGATGTGAGTA				GPC4_sgRNA_Ex3III	AAATTCTGAGCTATTTAAAGATCTCTTCGTAGAGTTGAAACGTTACTACGTGGTGGGAAATGTGAACCTGGAAGAAATGC
LGR4/5/6KO; GPC4KO	20	3F, 3G	LGR4_sgRNA_Ex1	GCGAGCAGCGCCGCGGGAGAGGCCGGCGCGGGAGGCGGCCGCAGCAA---------CGCTAGGGCTGCTCTGCTTCCTCG	9 bp deletion	start codon mutated from ATG (Met) to ACG (Thr)		LGR5_sgRNA_Ex16; LGR5_sgRNA_Ex17	AAGGGTTATAGAAATGCCTTATGCTTACCAGTG-----------------------------------------------------------... ---------------------------------ATTCAGTGCAGTGTTCACCTTCCCCAGGTGAGAAAGGCATCAAAAAT	2205 bp deletion	frameshift	PCR product is visibly smaller	LGR6_sgRNA_Ex8	GGGGGTTCCATAACAACAACATCAAGGCCATCCCAGAAAAGGCCTTCCATGGGGAACCCTCTGCTACAGACGATGTGAGTA	1 bp insertion	frameshift		GPC4_sgRNA_Ex3III	AAATTCTGAGCTATTTAAAGATCTCTTCGTAGAGTTGAAACGTTACTTACGTGGTGGGAAATGTGAACCTGGAAGAAATGC	1 bp insertion	frameshift
