# Supplementary material for: R-spondins engage heparan sulfate proteoglycans to potentiate WNT signaling
Source: eLife. 2020 May 20;9:e54469. doi: 10.7554/eLife.54469 (PMC7239654; doi:10.7554/eLife.54469)
Supplement: Supplementary file 4. — Genes containing at least one inactivating GT insertion in the population of sorted cells from each of the two genetic screens described in this work are listed in separate spreadsheets (the screen name is indicated on the tab of each spreadsheet), and are ranked based on the significance of inactivating GT insertion enrichment (p-value) in the sorted vs. the unsorted (control) cells. For the unsorted cells, the number of all GT insertions in genes (regardless of orientation) is indicated for the complete dataset and for each gene (column B). For the sorted cells, the total number of inactivating GT insertions in genes (sense and antisense insertions in exons and sense insertions in introns, column C), as well as the number of sense or antisense GT insertions in exons or in introns (columns D-G), is indicated for the complete dataset and for each gene. Three measures of GT insertion enrichment are shown: the p-value and the FDR-corrected p-value (both derived from columns B and C), the latter of which was used to generate the circle plots in Figure 6A and B, and the Intronic GT Insertion Orientation Bias (IGTIOB) score (derived from columns F and G), used to generate the heat map in Figure 6C. See Materials and methods for details. [file elife-54469-supp4.xlsx]

## Sheet: RSPO1 screen in HAP1-7TGP
	Unsorted cells	Sorted cells					Derived from columns B and C		Derived from columns F and G
	All GT insertions in genes	Inactivating GT insertions in genes	Sense GT insetions in exons	Antisense GT insetions in exons	Sense GT insetions in introns	Antisense GT insetions in introns	p-value	FDR-corrected p-value	IGTIOB score
Total for dataset:	208561	46233	4380	4480	37373	35896
Gene
LRP6	38	91	10	10	71	10	1.44024e-38	1.44197e-34	18.0914
CNOT2	12	66	1	0	65	4	5.08008e-37	2.54309e-33	21.5869
AXIN2	2	50	0	1	49	17	7.94658e-35	2.65204e-31	10.0263
LGR4	167	155	6	4	145	32	1.73885e-34	4.35234e-31	18.1935
DOT1L	31	65	5	1	59	9	2.2371e-26	4.47956e-23	16.5358
TFAP4	79	86	10	9	67	56	7.90271e-23	1.3187e-19	2.10342
CNOT3	7	32	5	3	24	8	7.64069e-18	1.09284e-14	7.98296
ERF	56	62	0	0	62	40	3.97023e-17	4.96875e-14	4.86902
WDR20	170	109	2	3	104	35	2.39987e-16	2.66972e-13	12.7213
CTNNB1	4	25	0	1	24	3	3.26726e-15	3.27118e-12	12.1754
PIGP	49	54	13	10	31	6	4.59872e-15	4.18567e-12	11.8658
SETD1B	13	32	11	6	15	17	1.13765e-14	9.49178e-12	-0.962279
KEAP1	37	45	2	0	43	11	9.48767e-14	7.30696e-11	11.7512
PIGU	17	31	2	0	29	7	1.69024e-12	1.20876e-09	10.451
PIGL	29	38	3	4	31	7	1.94718e-12	1.21845e-09	11.0904
SFRS1	29	38	11	9	18	6	1.94718e-12	1.21845e-09	7.0449
PIGS	7	22	7	1	14	2	2.03736e-11	1.19988e-08	8.8388
NEUROG2	5	17	3	14	0	2	2.58766e-09	1.42023e-06	-1.74126
GPAA1	1	13	4	5	4	5	2.69519e-09	1.42023e-06	-0.894632
NPRL3	35	34	6	1	27	5	4.10347e-09	2.0542e-06	11.3875
SPEN	78	51	1	0	50	23	1.10503e-08	5.26838e-06	7.73173
FZD5	8	18	8	10	0	2	1.58028e-08	7.19172e-06	-1.74126
BRD9	15	22	9	6	7	5	2.67863e-08	1.16602e-05	1.60669
BCL9	80	50	0	0	50	17	4.37213e-08	1.82391e-05	10.2504
MPDU1	34	31	1	0	30	10	5.16282e-08	2.06761e-05	8.71729
RHOA	20	24	9	1	14	0	6.33365e-08	2.43894e-05	10.5801
CREBBP	33	30	0	0	30	4	8.80771e-08	3.26603e-05	13.2756
GPC4	35	30	2	3	25	11	2.10048e-07	7.51073e-05	6.40619
MECOM	250	103	2	1	100	59	2.96819e-07	0.000102474	6.5436
MLL	5	13	0	1	12	3	7.9006e-07	0.000263669	6.71885
CSNK1D	7	14	1	1	12	7	1.33813e-06	0.000432171	3.25312
DPM3	2	9	6	2	1	2	8.21947e-06	0.00242039	-1.04811
PIGX	2	9	0	0	9	1	8.21947e-06	0.00242039	6.95587
RNF146	2	9	0	0	9	0	8.21947e-06	0.00242039	7.64902
MALAT1	93	46	20	26	0	0	1.74307e-05	0.00498618	0
HSD17B1	4	10	4	2	4	0	1.88851e-05	0.0051102	3.737
PIGT	4	10	3	3	4	0	1.88851e-05	0.0051102	3.737
PIGQ	6	11	2	1	8	6	2.93231e-05	0.00772587	1.50218
RAD54L	2	8	4	4	0	0	3.72383e-05	0.00955973	0
UNK	122	54	0	1	53	33	3.8971e-05	0.00975445	5.01593
HNRNPD	21	18	1	1	16	16	5.56459e-05	0.0135884	0
ZNF689	17	16	10	3	3	3	6.8373e-05	0.0162988	0
SC65	4	9	2	4	3	2	7.49455e-05	0.0174501	1.03133
HIRIP3	29	21	6	12	3	4	7.69867e-05	0.017518	-0.96441
DVL3	3	8	3	0	5	2	0.000114622	0.025502	2.89037
AKAP10	8	11	0	0	11	5	0.000124936	0.0266141	4.27667
C10orf2	8	11	7	4	0	0	0.000124936	0.0266141	0
BMPR2	31	21	4	4	13	7	0.000151096	0.0313406	3.8095
LOC100289341	26	19	5	14	0	0	0.000153385	0.0313406	0
C1orf213	56	30	10	20	0	0	0.000164955	0.0318	0
DPM1	2	7	1	4	2	0	0.000165162	0.0318	1.74126
NPEPL1	2	7	1	1	5	0	0.000165162	0.0318	4.63163
KISS1R	15	14	2	4	8	5	0.000205759	0.0371267	2.33341
LRRC14	15	14	11	2	1	0	0.000205759	0.0371267	0.693147
TICAM1	40	24	13	8	3	4	0.000206605	0.0371267	-0.96441
ALG8	32	21	1	1	19	5	0.000207661	0.0371267	8.31571
RAD54L2	7	10	0	1	9	1	0.000214723	0.037716	6.95587
EGLN1	4	8	5	2	1	1	0.000288806	0.049009	0
ZFP36L2	4	8	0	6	2	1	0.000288806	0.049009	1.04811
TBL1XR1	16	14	0	0	14	1	0.000321494	0.0536466	9.88691
NKX2-2	21	16	6	8	2	2	0.00036137	0.059312	0
C3orf71	8	10	6	4	0	0	0.000404415	0.0653065	0
LOC100128675	151	58	0	0	58	35	0.000421609	0.0670024	5.46017
LOC100216545	32	20	11	9	0	0	0.000462749	0.0723913	0
BAZ1B	55	28	0	2	26	8	0.000500074	0.0770268	8.7063
CPNE1	15	13	1	0	12	4	0.000557598	0.0833234	5.75444
RBM12	15	13	1	0	12	4	0.000557598	0.0833234	5.75444
PMM2	13	12	0	2	10	6	0.000624469	0.0906113	2.83249
SOLH	13	12	0	0	12	0	0.000624469	0.0906113	9.49144
F12	11	11	4	5	2	3	0.000681206	0.0974319	-1.03133
ECH1	7	9	2	2	5	0	0.000706608	0.0979985	4.63163
NUDT18	2	6	0	2	4	0	0.000713431	0.0979985	3.737
AHSA2	9	10	5	5	0	2	0.000714947	0.0979985	-1.74126
RAB26	18	14	5	2	7	1	0.00072432	0.0979985	5.54518
C19orf54	34	20	9	7	4	3	0.000814602	0.107587	0.96441
KLF5	26	17	3	0	14	5	0.00083817	0.107587	5.94842
PAN2	26	17	8	5	4	1	0.00083817	0.107587	3.04385
TRIP12	26	17	1	0	16	6	0.00083817	0.107587	6.11779
ARID1B	64	30	8	5	17	7	0.000915571	0.116034	5.81431
C11orf41	52	26	13	10	3	2	0.000953872	0.119377	1.03133
CITED1	1	5	1	4	0	1	0.00100201	0.11943	-0.693147
KCTD5	1	5	3	1	1	0	0.00100201	0.11943	0.693147
PIGA	1	5	0	0	5	0	0.00100201	0.11943	4.63163
VCPIP1	1	5	3	1	1	0	0.00100201	0.11943	0.693147
KLRG2	4	7	0	2	5	0	0.00107445	0.121505	4.63163
PYY	4	7	0	0	7	1	0.00107445	0.121505	5.54518
CHPF2	0	4	0	4	0	0	0.00108425	0.121505	0
TERF2IP	0	4	0	2	2	0	0.00108425	0.121505	1.74126
ZDHHC4	0	4	2	1	1	3	0.00108425	0.121505	-2.07944
MBLAC1	12	11	5	6	0	0	0.00109223	0.121505	0
PIGB	10	10	3	0	7	5	0.00119788	0.129095	1.60669
ATXN3	22	15	7	8	0	3	0.00123291	0.129095	-2.77259
DBNDD2	6	8	0	0	8	1	0.00123782	0.129095	6.27189
DDX39	6	8	0	0	8	8	0.00123782	0.129095	0
LOC80054	6	8	5	3	0	0	0.00123782	0.129095	0
PITPNM3	6	8	2	6	0	1	0.00123782	0.129095	-0.693147
LOC645676	8	9	5	4	0	0	0.00125998	0.130051	0
C12orf24	15	12	2	1	9	2	0.0014577	0.147419	5.90776
GPATCH8	15	12	0	0	12	2	0.0014577	0.147419	7.75018
C17orf71	3	6	3	3	0	0	0.00180997	0.177661	0
C19orf61	3	6	2	1	3	1	0.00180997	0.177661	2.07944
KREMEN2	3	6	1	4	1	0	0.00180997	0.177661	0.693147
KIAA0101	29	17	3	3	11	7	0.00200888	0.195271	2.66997
PRDM16	16	12	0	0	12	1	0.00213278	0.199458	8.79829
CHADL	5	7	3	4	0	0	0.00217435	0.199458	0
GGA3	5	7	3	1	3	2	0.00217435	0.199458	1.03133
HMCN1	5	7	0	0	7	1	0.00217435	0.199458	5.54518
MRI1	5	7	1	1	5	2	0.00217435	0.199458	2.89037
PIGM	5	7	3	4	0	0	0.00217435	0.199458	0
C7orf59	7	8	0	2	6	4	0.00223125	0.199458	1.72586
DVL1	7	8	3	0	5	1	0.00223125	0.199458	3.93848
TRIB3	7	8	0	1	7	3	0.00223125	0.199458	3.46574
PGPEP1	24	15	7	7	1	0	0.0023011	0.203881	0.693147
B3GAT3	19	13	0	0	13	10	0.00251435	0.215872	1.75247
UBXN11	19	13	0	0	13	5	0.00251435	0.215872	5.4162
FDPS	14	11	2	2	7	6	0.00252267	0.215872	0.775464
KIAA1908	14	11	5	0	6	2	0.00252267	0.215872	3.7216
CENPT	103	40	0	0	40	23	0.00256354	0.21751	5.3244
LOC147727	30	17	8	9	0	0	0.00262123	0.220536	0
CCDC142	12	10	3	7	0	0	0.00294609	0.238637	0
KILLIN	12	10	5	5	0	0	0.00294609	0.238637	0
SKP2	12	10	1	0	9	6	0.00294609	0.238637	2.18616
HSP90B1	2	5	0	0	5	1	0.00297939	0.238637	3.93848
MGAT2	2	5	1	4	0	0	0.00297939	0.238637	0
SDF2L1	2	5	4	1	0	0	0.00297939	0.238637	0
LYSMD1	10	9	0	5	4	0	0.00337608	0.264951	3.737
MEN1	10	9	4	4	1	0	0.00337608	0.264951	0.693147
TP53	34	18	1	1	16	13	0.00346137	0.264951	1.53283
C21orf58	20	13	5	7	1	1	0.0034667	0.264951	0
MPG	20	13	2	2	9	1	0.0034667	0.264951	6.95587
NONO	20	13	1	0	12	6	0.0034667	0.264951	4.02858
FLJ37453	75	31	11	14	6	3	0.00355764	0.269841	2.69027
BTBD2	8	8	1	1	6	0	0.00375589	0.277829	5.46286
SLC27A5	8	8	4	2	2	4	0.00375589	0.277829	-1.99574
PLEKHG4	23	14	6	8	0	0	0.00379645	0.277829	0
C4orf10	4	6	2	4	0	0	0.00382945	0.277829	0
EPN3	4	6	2	4	0	0	0.00382945	0.277829	0
MED9	4	6	1	0	5	1	0.00382945	0.277829	3.93848
NDUFS7	6	7	0	0	7	2	0.00397494	0.280261	4.49707
ORC5L	6	7	0	0	7	3	0.00397494	0.280261	3.46574
TFR2	6	7	3	1	3	1	0.00397494	0.280261	2.07944
TNFSF13	6	7	1	6	0	0	0.00397494	0.280261	0
PDXK	18	12	0	0	12	3	0.00424307	0.295768	6.71885
SEC14L2	32	17	6	10	1	1	0.00431411	0.295768	0
ANKRD34A	13	10	4	5	1	1	0.00437212	0.295768	0
RUVBL1	13	10	2	0	8	3	0.00437212	0.295768	4.19245
SYS1-DBNDD2	13	10	0	0	10	3	0.00437212	0.295768	5.52277
TSC1	13	10	0	0	10	3	0.00437212	0.295768	5.52277
EHBP1L1	1	4	2	2	0	2	0.00463421	0.30727	-1.74126
FBXO24	1	4	1	0	3	1	0.00463421	0.30727	2.07944
ZNF259	1	4	2	1	1	2	0.00463421	0.30727	-1.04811
FKBP10	21	13	5	2	6	10	0.00469166	0.309032	-2.83249
NRARP	11	9	5	4	0	0	0.00515824	0.336609	0
BTG2	16	11	5	6	0	1	0.00517757	0.336609	-0.693147
C17orf86	30	16	2	3	11	3	0.00538295	0.3438	6.13571
B3GNT1	19	12	6	6	0	2	0.00579417	0.3438	-1.74126
THBS3	19	12	5	5	2	0	0.00579417	0.3438	1.74126
MUM1	65	27	8	4	15	9	0.00590804	0.3438	3.44133
C18orf34	9	8	0	2	6	4	0.00597448	0.3438	1.72586
STT3A	9	8	0	0	8	2	0.00597448	0.3438	5.22378
ACAA1	0	3	0	0	3	0	0.00597496	0.3438	2.77259
APOBEC3F	0	3	0	0	3	0	0.00597496	0.3438	2.77259
CDKN1A	0	3	0	0	3	1	0.00597496	0.3438	2.07944
CEMP1	0	3	1	2	0	0	0.00597496	0.3438	0
FAM160B2	0	3	0	0	3	1	0.00597496	0.3438	2.07944
GABBR1	0	3	0	0	3	2	0.00597496	0.3438	1.03133
MCAT	0	3	1	2	0	0	0.00597496	0.3438	0
PDLIM7	0	3	0	0	3	0	0.00597496	0.3438	2.77259
PLXND1	0	3	1	1	1	1	0.00597496	0.3438	0
SEPT4	0	3	1	0	2	0	0.00597496	0.3438	1.74126
SPNS1	0	3	0	3	0	0	0.00597496	0.3438	0
STAC2	0	3	1	1	1	0	0.00597496	0.3438	0.693147
TMED7-TICAM2	0	3	0	1	2	2	0.00597496	0.3438	0
TRIM28	0	3	1	0	2	0	0.00597496	0.3438	1.74126
ARRDC3	72	29	1	4	24	12	0.00622872	0.350471	5.45656
PRRG2	22	13	9	4	0	1	0.00624122	0.350471	-0.693147
C11orf59	14	10	0	0	10	1	0.00628974	0.350471	7.60221
CDKN2BAS	25	14	2	1	11	4	0.00654329	0.350471	5.1713
PRMT7	25	14	0	1	13	5	0.00654329	0.350471	5.4162
AGL	7	7	1	2	4	4	0.00671205	0.350471	0
ATF5	7	7	3	1	3	3	0.00671205	0.350471	0
B3GALT6	7	7	6	1	0	0	0.00671205	0.350471	0
DBF4	7	7	2	0	5	1	0.00671205	0.350471	3.93848
HCG11	7	7	3	4	0	0	0.00671205	0.350471	0
SMARCAD1	7	7	2	1	4	3	0.00671205	0.350471	0.96441
TSC2	7	7	1	1	5	3	0.00671205	0.350471	1.85904
FAIM	3	5	2	1	2	3	0.00675598	0.350471	-1.03133
HDAC7	3	5	0	0	5	1	0.00675598	0.350471	3.93848
NHLRC4	3	5	3	2	0	1	0.00675598	0.350471	-0.693147
PRICKLE3	3	5	0	0	5	5	0.00675598	0.350471	0
RIC8A	3	5	1	3	1	1	0.00675598	0.350471	0
SLC35B2	3	5	1	2	2	2	0.00675598	0.350471	0
SLCO4A1	3	5	0	0	5	0	0.00675598	0.350471	4.63163
ATP6V0E2	5	6	4	2	0	1	0.00713545	0.357815	-0.693147
MESP1	5	6	4	1	1	0	0.00713545	0.357815	0.693147
PPM1K	5	6	1	0	5	4	0.00713545	0.357815	0.894632
SLC39A9	5	6	0	2	4	1	0.00713545	0.357815	3.04385
UBL4A	5	6	2	4	0	2	0.00713545	0.357815	-1.74126
UBQLN2	5	6	3	3	0	0	0.00713545	0.357815	0
SUV420H2	17	11	0	3	8	5	0.00714772	0.357815	2.33341
ASXL2	12	9	1	3	5	4	0.00758947	0.374314	0.894632
C16orf91	12	9	1	3	5	6	0.00758947	0.374314	-0.831229
CCR10	12	9	4	5	0	2	0.00758947	0.374314	-1.74126
TAL1	20	12	3	1	8	5	0.00776207	0.38095	2.33341
APCDD1L	123	43	0	0	43	33	0.00820925	0.400932	2.7193
C11orf48	35	17	3	0	14	7	0.00844081	0.41024	4.34173
C17orf48	15	10	0	1	9	7	0.00880111	0.421611	1.4107
E2F3	15	10	3	3	4	7	0.00880111	0.421611	-2.50133
PRR7	15	10	3	6	1	4	0.00880111	0.421611	-3.04385
LOC100129716	61	25	2	6	17	17	0.00894117	0.425939	0
CDC42EP4	10	8	0	1	7	5	0.00906162	0.425939	1.60669
TNFSF12-TNFSF13	10	8	1	6	1	1	0.00906162	0.425939	0
TSPAN4	10	8	0	1	7	8	0.00906162	0.425939	-0.726712
P4HTM	48	21	3	4	14	7	0.00911656	0.426519	4.34173
COLEC11	18	11	0	0	11	8	0.00965623	0.447584	1.94326
HEXIM1	18	11	7	4	0	0	0.00965623	0.447584	0
UST	55	23	0	0	23	13	0.00987961	0.455828	4.52343
ARHGEF18	21	12	0	0	12	6	0.0102166	0.464252	4.02858
RECK	21	12	1	0	11	4	0.0102166	0.464252	5.1713
ANKRD11	52	22	0	0	22	13	0.0103596	0.464252	4.13577
FADS1	24	13	1	2	10	11	0.010541	0.464252	-0.612942
ZWILCH	24	13	2	1	10	10	0.010541	0.464252	0
AHNAK	8	7	0	0	7	4	0.0106327	0.464252	2.50133
CHD1	8	7	0	0	7	2	0.0106327	0.464252	4.49707
CHD8	8	7	0	0	7	0	0.0106327	0.464252	6.23832
DNAJB12	8	7	2	4	1	2	0.0106327	0.464252	-1.04811
SFRS2	8	7	4	3	0	0	0.0106327	0.464252	0
IFT172	30	15	5	4	6	6	0.010676	0.464252	0
IMP3	30	15	6	9	0	0	0.010676	0.464252	0
YIF1B	27	14	0	0	14	4	0.0106802	0.464252	6.84306
DCLRE1A	13	9	4	5	0	0	0.0108041	0.464252	0
INCA1	13	9	4	3	2	0	0.0108041	0.464252	1.74126
OVCA2	13	9	3	4	2	3	0.0108041	0.464252	-1.03133
ADRBK1	2	4	0	0	4	1	0.0118986	0.476814	3.04385
AMPD2	2	4	1	0	3	2	0.0118986	0.476814	1.03133
ATG4D	2	4	1	2	1	1	0.0118986	0.476814	0
C10orf125	2	4	0	1	3	1	0.0118986	0.476814	2.07944
C22orf23	2	4	1	1	2	0	0.0118986	0.476814	1.74126
C3orf47	2	4	3	0	1	1	0.0118986	0.476814	0
ERLEC1	2	4	0	0	4	2	0.0118986	0.476814	1.99574
FOSB	2	4	0	2	2	1	0.0118986	0.476814	1.04811
GHDC	2	4	2	1	1	2	0.0118986	0.476814	-1.04811
LRRC23	2	4	2	2	0	1	0.0118986	0.476814	-0.693147
PRSS27	2	4	2	1	1	0	0.0118986	0.476814	0.693147
ZNF142	2	4	0	2	2	2	0.0118986	0.476814	0
C10orf110	16	10	0	0	10	5	0.012013	0.476814	3.66372
HSBP1L1	16	10	0	0	10	7	0.012013	0.476814	2.05703
SULT2B1	16	10	0	0	10	7	0.012013	0.476814	2.05703
ACD	6	6	3	2	1	1	0.0120966	0.476814	0
FKBPL	6	6	3	3	0	0	0.0120966	0.476814	0
IFI6	6	6	0	0	6	1	0.0120966	0.476814	4.76971
PTBP1	6	6	0	1	5	5	0.0120966	0.476814	0
SNX15	6	6	3	0	3	5	0.0120966	0.476814	-1.85904
XPA	6	6	0	0	6	4	0.0120966	0.476814	1.72586
BST2	40	18	2	3	13	12	0.01222	0.479792	0.556387
CNOT4	19	11	0	0	11	1	0.0127902	0.486993	8.21515
KIAA0195	19	11	0	0	11	6	0.0127902	0.486993	3.44544
LRRC41	19	11	0	1	10	1	0.0127902	0.486993	7.60221
PLEKHG5	19	11	1	1	9	4	0.0127902	0.486993	3.91202
ARSD	4	5	0	1	4	1	0.0129385	0.486993	3.04385
C15orf58	4	5	0	1	4	1	0.0129385	0.486993	3.04385
C4orf49	4	5	2	1	2	0	0.0129385	0.486993	1.74126
CTSA	4	5	3	1	1	0	0.0129385	0.486993	0.693147
LOC153684	4	5	3	2	0	1	0.0129385	0.486993	-0.693147
MCOLN3	4	5	0	0	5	2	0.0129385	0.486993	2.89037
OSBP2	4	5	1	0	4	1	0.0129385	0.486993	3.04385
ANKLE1	11	8	0	2	6	6	0.0131966	0.490856	0
TYSND1	11	8	3	3	2	1	0.0131966	0.490856	1.04811
PROCA1	22	12	1	1	10	2	0.0132302	0.490856	6.5541
IGF2BP2	31	15	0	0	15	10	0.0132372	0.490856	2.795
GNAL	28	14	0	0	14	6	0.0133976	0.49497	5.1172
CTAGE5	14	9	3	1	5	6	0.014939	0.549886	-0.831229
BAP1	9	7	0	0	7	3	0.0159814	0.579535	3.46574
TAF6	9	7	3	3	1	1	0.0159814	0.579535	0
TSC22D3	9	7	0	1	6	4	0.0159814	0.579535	1.72586
BTBD1	17	10	4	2	4	5	0.0160339	0.579535	-0.894632
IP6K1	17	10	5	1	4	8	0.0160339	0.579535	-3.22804
ZCCHC8	32	15	1	1	13	8	0.0162507	0.585261	3.08279
MAP7D2	29	14	4	7	3	1	0.0166189	0.586695	2.07944
SNUPN	29	14	5	3	6	3	0.0166189	0.586695	2.69027
ARID3B	20	11	0	0	11	7	0.016638	0.586695	2.66997
HUS1B	20	11	4	7	0	0	0.016638	0.586695	0
TMUB1	20	11	3	6	2	1	0.016638	0.586695	1.04811
KAZALD1	55	22	9	10	3	11	0.0166567	0.586695	-6.13571
EXT1	26	13	2	5	6	5	0.0168459	0.586695	0.831229
HMGN5	26	13	1	1	11	4	0.0168459	0.586695	5.1713
KLHL18	23	12	1	1	10	5	0.0168766	0.586695	3.66372
SMG6	23	12	0	2	10	12	0.0168766	0.586695	-1.19609
GATAD2B	76	28	2	1	25	19	0.0173692	0.601501	2.36715
MAD2L2	66	25	0	0	25	21	0.0184791	0.601501	1.53019
CSDE1	12	8	0	1	7	1	0.0185555	0.601501	5.54518
ITPKC	12	8	3	1	4	2	0.0185555	0.601501	1.99574
RAB33A	12	8	2	3	3	1	0.0185555	0.601501	2.07944
STK11	12	8	2	0	6	1	0.0185555	0.601501	4.76971
WDR90	12	8	2	1	5	3	0.0185555	0.601501	1.85904
CBX5	49	20	1	2	17	13	0.018618	0.601501	2.00481
ADAM17	7	6	1	1	4	3	0.0190579	0.601501	0.96441
AGRP	7	6	2	2	2	0	0.0190579	0.601501	1.74126
COL18A1	7	6	1	0	5	2	0.0190579	0.601501	2.89037
DPYSL5	7	6	0	0	6	4	0.0190579	0.601501	1.72586
GIPR	7	6	1	1	4	4	0.0190579	0.601501	0
GLTSCR1	7	6	0	0	6	5	0.0190579	0.601501	0.831229
HSPC157	7	6	2	2	2	1	0.0190579	0.601501	1.04811
NPAS2	7	6	1	0	5	3	0.0190579	0.601501	1.85904
PPP1R14B	7	6	0	0	6	2	0.0190579	0.601501	3.7216
PYGO2	7	6	1	1	4	3	0.0190579	0.601501	0.96441
TMEM129	7	6	0	2	4	2	0.0190579	0.601501	1.99574
IER2	46	19	0	3	16	13	0.0196443	0.601501	1.53283
DKFZp686O24166	33	15	0	0	15	9	0.0197638	0.601501	3.44133
YDJC	33	15	6	6	3	2	0.0197638	0.601501	1.03133
LRRC8B	106	36	21	10	5	4	0.0201188	0.601501	0.894632
PRKD2	15	9	3	1	5	2	0.0201285	0.601501	2.89037
NCRNA00263	30	14	6	2	6	5	0.0203982	0.601501	0.831229
SPRYD4	30	14	8	3	3	4	0.0203982	0.601501	-0.96441
THAP4	30	14	0	0	14	6	0.0203982	0.601501	5.1172
BHLHE22	1	3	2	1	0	0	0.0206471	0.601501	0
BNIPL	1	3	0	2	1	1	0.0206471	0.601501	0
CFL1	1	3	0	0	3	1	0.0206471	0.601501	2.07944
CIB1	1	3	0	0	3	3	0.0206471	0.601501	0
CMAS	1	3	0	0	3	0	0.0206471	0.601501	2.77259
DFNB31	1	3	0	1	2	0	0.0206471	0.601501	1.74126
FIBP	1	3	1	0	2	2	0.0206471	0.601501	0
JMJD4	1	3	1	2	0	1	0.0206471	0.601501	-0.693147
LOC283392	1	3	0	2	1	4	0.0206471	0.601501	-3.04385
MXD3	1	3	0	2	1	0	0.0206471	0.601501	0.693147
OGFR	1	3	1	0	2	0	0.0206471	0.601501	1.74126
OLFM3	1	3	0	0	3	1	0.0206471	0.601501	2.07944
PCYOX1L	1	3	0	0	3	0	0.0206471	0.601501	2.77259
PIGH	1	3	0	0	3	0	0.0206471	0.601501	2.77259
RASSF7	1	3	0	1	2	0	0.0206471	0.601501	1.74126
RPGR	1	3	0	1	2	1	0.0206471	0.601501	1.04811
SDHAF1	1	3	1	2	0	0	0.0206471	0.601501	0
SFXN3	1	3	0	1	2	1	0.0206471	0.601501	1.04811
STUB1	1	3	1	2	0	0	0.0206471	0.601501	0
STYXL1	1	3	1	0	2	1	0.0206471	0.601501	1.04811
SYT17	1	3	0	0	3	1	0.0206471	0.601501	2.07944
TNFSF9	1	3	0	0	3	1	0.0206471	0.601501	2.07944
TRPT1	1	3	1	0	2	0	0.0206471	0.601501	1.74126
ULBP1	1	3	0	0	3	1	0.0206471	0.601501	2.07944
VAMP1	1	3	0	0	3	0	0.0206471	0.601501	2.77259
ZNF221	1	3	1	1	1	0	0.0206471	0.601501	0.693147
ZNF780A	1	3	0	0	3	1	0.0206471	0.601501	2.07944
MYCL1	27	13	5	3	5	1	0.0209062	0.601501	3.93848
SMAD4	27	13	5	2	6	0	0.0209062	0.601501	5.46286
TMEM143	27	13	5	4	4	13	0.0209062	0.601501	-6.31083
UBAP2L	27	13	3	3	7	3	0.0209062	0.601501	3.46574
MC1R	18	10	5	5	0	0	0.0209706	0.601501	0
JUNB	24	12	5	7	0	0	0.0212292	0.601501	0
B4GALT7	5	5	0	0	5	3	0.0220475	0.601501	1.85904
BCKDHA	5	5	2	0	3	1	0.0220475	0.601501	2.07944
BEST4	5	5	0	1	4	0	0.0220475	0.601501	3.737
BHLHE40	5	5	1	4	0	0	0.0220475	0.601501	0
C19orf56	5	5	0	3	2	0	0.0220475	0.601501	1.74126
CN5H6.4	5	5	2	3	0	0	0.0220475	0.601501	0
CTH	5	5	0	0	5	3	0.0220475	0.601501	1.85904
ITPRIPL2	5	5	3	2	0	0	0.0220475	0.601501	0
NPRL2	5	5	2	1	2	2	0.0220475	0.601501	0
PTP4A1	5	5	2	1	2	1	0.0220475	0.601501	1.04811
PURB	5	5	3	2	0	0	0.0220475	0.601501	0
SFRS12IP1	5	5	0	1	4	0	0.0220475	0.601501	3.737
SMOX	5	5	0	0	5	2	0.0220475	0.601501	2.89037
TERT	5	5	2	3	0	0	0.0220475	0.601501	0
ZNF263	5	5	2	2	1	0	0.0220475	0.601501	0.693147
ZNF358	5	5	0	0	5	0	0.0220475	0.601501	4.63163
ABHD14B	10	7	4	3	0	2	0.0229863	0.601501	-1.74126
CHST14	10	7	2	5	0	0	0.0229863	0.601501	0
FAM53C	10	7	0	0	7	3	0.0229863	0.601501	3.46574
HBXIP	10	7	0	0	7	1	0.0229863	0.601501	5.54518
LOC401093	10	7	3	4	0	0	0.0229863	0.601501	0
LYPLA1	10	7	1	0	6	1	0.0229863	0.601501	4.76971
MDP1	10	7	2	2	3	2	0.0229863	0.601501	1.03133
TM9SF1	10	7	3	2	2	5	0.0229863	0.601501	-2.89037
ZNF747	10	7	3	1	3	4	0.0229863	0.601501	-0.96441
APBA3	3	4	1	0	3	0	0.0237909	0.601501	2.77259
BPGM	3	4	0	0	4	0	0.0237909	0.601501	3.737
C11orf52	3	4	1	3	0	0	0.0237909	0.601501	0
CTNNBIP1	3	4	0	0	4	0	0.0237909	0.601501	3.737
CTSH	3	4	0	0	4	1	0.0237909	0.601501	3.04385
DOM3Z	3	4	2	1	1	0	0.0237909	0.601501	0.693147
E2F7	3	4	0	0	4	0	0.0237909	0.601501	3.737
EIF5	3	4	0	2	2	0	0.0237909	0.601501	1.74126
GDF15	3	4	0	2	2	0	0.0237909	0.601501	1.74126
IER3	3	4	2	2	0	0	0.0237909	0.601501	0
KRT8	3	4	0	0	4	0	0.0237909	0.601501	3.737
LOC285954	3	4	0	0	4	0	0.0237909	0.601501	3.737
MAP2K7	3	4	0	0	4	0	0.0237909	0.601501	3.737
MPZL1	3	4	0	0	4	1	0.0237909	0.601501	3.04385
NBEAL2	3	4	0	0	4	1	0.0237909	0.601501	3.04385
NDUFB11	3	4	1	0	3	1	0.0237909	0.601501	2.07944
NICN1	3	4	0	0	4	0	0.0237909	0.601501	3.737
PACSIN3	3	4	3	0	1	0	0.0237909	0.601501	0.693147
PAQR4	3	4	2	1	1	0	0.0237909	0.601501	0.693147
STK24	3	4	0	0	4	1	0.0237909	0.601501	3.04385
UCKL1AS	3	4	1	3	0	0	0.0237909	0.601501	0
WDR24	3	4	1	2	1	2	0.0237909	0.601501	-1.04811
YY1	3	4	1	3	0	1	0.0237909	0.601501	-0.693147
HNRNPUL1	61	23	4	1	18	26	0.0240256	0.605904	-3.16357
SLC29A2	31	14	1	0	13	8	0.0247889	0.623583	3.08279
TNPO2	79	28	7	3	18	25	0.0250277	0.628013	-2.80672
ARID1A	13	8	3	1	4	3	0.0253038	0.628638	0.96441
PLAUR	13	8	0	1	7	7	0.0253038	0.628638	0
SLC19A1	13	8	0	0	8	8	0.0253038	0.628638	0
USP13	13	8	1	1	6	5	0.0253038	0.628638	0.831229
HSPC159	72	26	14	8	4	8	0.0254455	0.630594	-3.22804
BBC3	58	22	2	2	18	18	0.0256259	0.632194	0
UHRF1	28	13	6	2	5	4	0.0256539	0.632194	0.894632
C4orf34	41	17	0	0	17	11	0.0256995	0.632194	3.14434
MAGIX	25	12	4	6	2	3	0.0263595	0.639568	-1.03133
MKNK2	25	12	0	5	7	1	0.0263595	0.639568	5.54518
CIRBP	16	9	3	0	6	7	0.0265002	0.639568	-0.775464
DPH1	16	9	3	4	2	5	0.0265002	0.639568	-2.89037
CDK2AP1	94	32	1	3	28	31	0.0265024	0.639568	-0.97042
ALG3	22	11	3	2	6	2	0.0268226	0.639568	3.7216
C10orf95	22	11	7	3	1	0	0.0268226	0.639568	0.693147
LRRC45	22	11	3	4	4	6	0.0268226	0.639568	-1.72586
SIM2	22	11	3	1	7	1	0.0268226	0.639568	5.54518
CALR3	19	10	3	1	6	4	0.0269256	0.639568	1.72586
FAM109B	19	10	5	5	0	0	0.0269256	0.639568	0
HAGHL	19	10	5	2	3	2	0.0269256	0.639568	1.03133
OGFOD2	19	10	4	5	1	0	0.0269256	0.639568	0.693147
SLC16A9	19	10	2	3	5	2	0.0269256	0.639568	2.89037
E2F2	38	16	4	5	7	11	0.0270852	0.639568	-2.66997
PTPLA	38	16	0	1	15	6	0.0270852	0.639568	5.62749
RPL27A	38	16	4	12	0	9	0.0270852	0.639568	-7.64902
ATP6V0A1	8	6	0	0	6	2	0.0283174	0.651755	3.7216
C16orf72	8	6	1	0	5	6	0.0283174	0.651755	-0.831229
CCDC106	8	6	0	3	3	0	0.0283174	0.651755	2.77259
DALRD3	8	6	0	0	6	2	0.0283174	0.651755	3.7216
INO80D	8	6	0	0	6	2	0.0283174	0.651755	3.7216
LOC100131496	8	6	2	4	0	0	0.0283174	0.651755	0
PIGK	8	6	1	0	5	0	0.0283174	0.651755	4.63163
RBM3	8	6	1	1	4	7	0.0283174	0.651755	-2.50133
SFRS2B	8	6	4	2	0	0	0.0283174	0.651755	0
SHISA3	8	6	1	3	2	1	0.0283174	0.651755	1.04811
ZNF384	8	6	2	2	2	3	0.0283174	0.651755	-1.03133
NFIC	136	43	1	2	40	32	0.0291496	0.654945	2.25789
MCF2L	59	22	2	2	18	13	0.0293158	0.654945	2.45994
KDM2B	144	45	5	6	34	41	0.0301532	0.654945	-1.91831
CORIN	11	7	0	0	7	4	0.0318474	0.654945	2.50133
NEURL4	11	7	3	3	1	3	0.0318474	0.654945	-2.07944
OMG	107	35	8	21	6	1	0.0321561	0.654945	4.76971
AHCY	26	12	0	0	12	13	0.0323354	0.654945	-0.556387
LTBP4	26	12	1	0	11	6	0.0323354	0.654945	3.44544
ADM	0	2	0	2	0	1	0.0329267	0.654945	-0.693147
ARL1	0	2	0	0	2	0	0.0329267	0.654945	1.74126
ASB5	0	2	0	0	2	0	0.0329267	0.654945	1.74126
ATP1B2	0	2	0	1	1	0	0.0329267	0.654945	0.693147
C12orf26	0	2	0	1	1	0	0.0329267	0.654945	0.693147
C17orf56	0	2	0	0	2	1	0.0329267	0.654945	1.04811
C18orf45	0	2	0	0	2	2	0.0329267	0.654945	0
C22orf40	0	2	0	0	2	0	0.0329267	0.654945	1.74126
C2CD4A	0	2	2	0	0	1	0.0329267	0.654945	-0.693147
CD9	0	2	0	0	2	1	0.0329267	0.654945	1.04811
CDHR5	0	2	0	1	1	0	0.0329267	0.654945	0.693147
CUEDC1	0	2	0	0	2	0	0.0329267	0.654945	1.74126
EIF4E1B	0	2	1	1	0	0	0.0329267	0.654945	0
FCGRT	0	2	0	1	1	0	0.0329267	0.654945	0.693147
FLJ42289	0	2	1	1	0	0	0.0329267	0.654945	0
FYB	0	2	0	0	2	2	0.0329267	0.654945	0
FZD2	0	2	1	1	0	0	0.0329267	0.654945	0
GALNT9	0	2	0	1	1	1	0.0329267	0.654945	0
GOLGA2	0	2	0	0	2	0	0.0329267	0.654945	1.74126
HMGN2	0	2	1	0	1	0	0.0329267	0.654945	0.693147
IFT52	0	2	0	0	2	1	0.0329267	0.654945	1.04811
IRF7	0	2	1	0	1	0	0.0329267	0.654945	0.693147
JAK3	0	2	0	0	2	1	0.0329267	0.654945	1.04811
JPH3	0	2	1	0	1	0	0.0329267	0.654945	0.693147
KIAA0913	0	2	1	0	1	2	0.0329267	0.654945	-1.04811
LGMN	0	2	0	0	2	0	0.0329267	0.654945	1.74126
LMO1	0	2	0	0	2	0	0.0329267	0.654945	1.74126
LOC145845	0	2	0	1	1	0	0.0329267	0.654945	0.693147
LOC338651	0	2	0	0	2	0	0.0329267	0.654945	1.74126
LOC389333	0	2	2	0	0	0	0.0329267	0.654945	0
MAPKSP1	0	2	0	0	2	1	0.0329267	0.654945	1.04811
NAT6	0	2	0	1	1	0	0.0329267	0.654945	0.693147
NDUFB1	0	2	1	0	1	1	0.0329267	0.654945	0
OMD	0	2	1	0	1	0	0.0329267	0.654945	0.693147
PTPRN	0	2	0	0	2	0	0.0329267	0.654945	1.74126
RAB7A	0	2	0	0	2	0	0.0329267	0.654945	1.74126
RET	0	2	0	1	1	0	0.0329267	0.654945	0.693147
RFNG	0	2	0	0	2	1	0.0329267	0.654945	1.04811
RPL32P3	0	2	0	1	1	1	0.0329267	0.654945	0
RPS2P32	0	2	2	0	0	0	0.0329267	0.654945	0
SLC35E1	0	2	1	0	1	1	0.0329267	0.654945	0
SLC46A3	0	2	2	0	0	1	0.0329267	0.654945	-0.693147
SNORD93	0	2	2	0	0	0	0.0329267	0.654945	0
TARDBP	0	2	1	0	1	0	0.0329267	0.654945	0.693147
TFEB	0	2	0	1	1	0	0.0329267	0.654945	0.693147
TMED7	0	2	0	1	1	2	0.0329267	0.654945	-1.04811
TMEM127	0	2	1	0	1	0	0.0329267	0.654945	0.693147
TMEM205	0	2	2	0	0	0	0.0329267	0.654945	0
TRIM39	0	2	1	1	0	0	0.0329267	0.654945	0
TSPYL2	0	2	2	0	0	0	0.0329267	0.654945	0
WISP2	0	2	0	0	2	1	0.0329267	0.654945	1.04811
WIT1	0	2	0	0	2	0	0.0329267	0.654945	1.74126
ZBTB22	0	2	1	1	0	0	0.0329267	0.654945	0
ZNF37B	0	2	0	2	0	0	0.0329267	0.654945	0
ZSCAN18	0	2	0	0	2	0	0.0329267	0.654945	1.74126
ANKRD17	23	11	0	0	11	4	0.0333233	0.654945	5.1713
ARIH2	23	11	0	0	11	5	0.0333233	0.654945	4.27667
UQCR11	23	11	1	1	9	3	0.0333233	0.654945	4.87643
C9orf69	14	8	0	0	8	7	0.0335893	0.654945	0.726712
EMILIN1	14	8	0	5	3	1	0.0335893	0.654945	2.07944
HSBP1	14	8	1	4	3	0	0.0335893	0.654945	2.77259
KCNN1	14	8	0	1	7	3	0.0335893	0.654945	3.46574
CENPV	36	15	3	0	12	11	0.0337639	0.654945	0.583143
SPHK2	36	15	2	0	13	15	0.0337639	0.654945	-1.04253
PVT1	20	10	0	0	10	5	0.0339933	0.654945	3.66372
SRC	20	10	0	0	10	6	0.0339933	0.654945	2.83249
SUN1	20	10	4	4	2	0	0.0339933	0.654945	1.74126
ZNF609	20	10	0	0	10	2	0.0339933	0.654945	6.5541
COMMD7	17	9	0	2	7	1	0.0341698	0.654945	5.54518
DNAJA2	17	9	5	0	4	1	0.0341698	0.654945	3.04385
TADA2A	17	9	3	1	5	3	0.0341698	0.654945	1.85904
ARHGAP39	6	5	2	3	0	0	0.0344742	0.654945	0
C15orf42	6	5	0	1	4	6	0.0344742	0.654945	-1.72586
COQ2	6	5	0	0	5	2	0.0344742	0.654945	2.89037
DDHD2	6	5	1	0	4	1	0.0344742	0.654945	3.04385
DECR2	6	5	0	0	5	1	0.0344742	0.654945	3.93848
DLX3	6	5	1	0	4	3	0.0344742	0.654945	0.96441
FXYD1	6	5	0	0	5	0	0.0344742	0.654945	4.63163
ICAM3	6	5	2	2	1	1	0.0344742	0.654945	0
LRSAM1	6	5	0	4	1	1	0.0344742	0.654945	0
MAML1	6	5	0	1	4	0	0.0344742	0.654945	3.737
OAZ1	6	5	0	2	3	1	0.0344742	0.654945	2.07944
PCBD2	6	5	0	0	5	3	0.0344742	0.654945	1.85904
PDLIM2	6	5	3	2	0	1	0.0344742	0.654945	-0.693147
FAM122C	43	17	2	1	14	12	0.0351808	0.667102	1.08862
JAG1	27	12	1	0	11	3	0.0392197	0.69875	6.13571
LOC92249	27	12	0	0	12	4	0.0392197	0.69875	5.75444
SORBS3	27	12	4	1	7	4	0.0392197	0.69875	2.50133
FAM78A	113	36	6	4	26	18	0.0395874	0.69875	3.16357
SOHLH2	37	15	1	0	14	13	0.0397305	0.69875	0.532228
ABCB10	9	6	1	0	5	4	0.0401071	0.69875	0.894632
APITD1	9	6	2	1	3	1	0.0401071	0.69875	2.07944
ARHGAP8	9	6	0	0	6	1	0.0401071	0.69875	4.76971
C14orf4	9	6	2	4	0	0	0.0401071	0.69875	0
DLG5	9	6	0	0	6	6	0.0401071	0.69875	0
DR1	9	6	1	1	4	1	0.0401071	0.69875	3.04385
NEK6	9	6	0	0	6	3	0.0401071	0.69875	2.69027
SPCS1	9	6	1	0	5	1	0.0401071	0.69875	3.93848
TMEM26	44	17	3	3	11	11	0.0407788	0.69875	0
AGAP3	4	4	0	0	4	2	0.0408258	0.69875	1.99574
ANKRD13B	4	4	1	0	3	4	0.0408258	0.69875	-0.96441
BAI2	4	4	0	0	4	1	0.0408258	0.69875	3.04385
C19orf57	4	4	0	0	4	0	0.0408258	0.69875	3.737
COX8A	4	4	0	1	3	1	0.0408258	0.69875	2.07944
EID2B	4	4	0	4	0	0	0.0408258	0.69875	0
LOC25845	4	4	1	2	1	1	0.0408258	0.69875	0
LOC653653	4	4	3	1	0	0	0.0408258	0.69875	0
LOH12CR2	4	4	3	1	0	0	0.0408258	0.69875	0
LRRC56	4	4	1	2	1	0	0.0408258	0.69875	0.693147
MOBKL1A	4	4	0	0	4	1	0.0408258	0.69875	3.04385
NOL3	4	4	1	1	2	0	0.0408258	0.69875	1.74126
PALM	4	4	0	0	4	1	0.0408258	0.69875	3.04385
PSKH2	4	4	0	0	4	2	0.0408258	0.69875	1.99574
RBM24	4	4	2	0	2	2	0.0408258	0.69875	0
REPIN1	4	4	2	1	1	3	0.0408258	0.69875	-2.07944
RLTPR	4	4	2	0	2	1	0.0408258	0.69875	1.04811
SEMA5B	4	4	1	0	3	0	0.0408258	0.69875	2.77259
SFPQ	4	4	2	1	1	1	0.0408258	0.69875	0
SLC6A9	4	4	1	2	1	4	0.0408258	0.69875	-3.04385
SYNPO2	4	4	0	0	4	2	0.0408258	0.69875	1.99574
TAS1R1	4	4	3	0	1	1	0.0408258	0.69875	0
UNC5B	4	4	1	1	2	1	0.0408258	0.69875	1.04811
UNC5CL	4	4	2	2	0	0	0.0408258	0.69875	0
UNG	4	4	0	2	2	1	0.0408258	0.69875	1.04811
USP8	4	4	0	1	3	0	0.0408258	0.69875	2.77259
XYLT2	4	4	0	0	4	0	0.0408258	0.69875	3.737
WWP2	24	11	0	0	11	3	0.0408614	0.69875	6.13571
TIA1	51	19	2	0	17	19	0.0409865	0.69875	-0.894706
SLC3A2	80	27	3	4	20	15	0.0419071	0.69875	2.28215
BRD3	21	10	0	0	10	5	0.0422577	0.69875	3.66372
MRM1	21	10	3	2	5	0	0.0422577	0.69875	4.63163
RCC1	21	10	0	0	10	8	0.0422577	0.69875	1.33032
TRIP6	21	10	3	2	5	4	0.0422577	0.69875	0.894632
KIAA0664	12	7	0	0	7	2	0.0427271	0.69875	4.49707
LOXL1	12	7	3	1	3	2	0.0427271	0.69875	1.03133
NOG	12	7	5	2	0	0	0.0427271	0.69875	0
PIK3R1	12	7	1	2	4	0	0.0427271	0.69875	3.737
PPP1R10	12	7	0	3	4	1	0.0427271	0.69875	3.04385
SGK269	12	7	0	0	7	6	0.0427271	0.69875	0.775464
TCTN1	12	7	1	2	4	4	0.0427271	0.69875	0
BSG	62	22	5	3	14	11	0.0427952	0.69875	1.67176
CLK3	18	9	5	2	2	3	0.0432378	0.69875	-1.03133
XKR3	18	9	0	0	9	2	0.0432378	0.69875	5.90776
C14orf126	15	8	0	0	8	5	0.0435361	0.69875	2.33341
CAMTA2	15	8	3	1	4	2	0.0435361	0.69875	1.99574
CD247	15	8	2	4	2	3	0.0435361	0.69875	-1.03133
JTB	15	8	3	3	2	1	0.0435361	0.69875	1.04811
GATAD2A	31	13	0	0	13	7	0.0445924	0.69875	3.8095
ALDH18A1	2	3	0	0	3	0	0.0446664	0.69875	2.77259
AMZ2P1	2	3	2	0	1	0	0.0446664	0.69875	0.693147
ANKRD13C	2	3	0	0	3	1	0.0446664	0.69875	2.07944
AP3B2	2	3	0	1	2	1	0.0446664	0.69875	1.04811
ARMC2	2	3	0	0	3	1	0.0446664	0.69875	2.07944
ASPDH	2	3	2	0	1	0	0.0446664	0.69875	0.693147
AVL9	2	3	0	0	3	0	0.0446664	0.69875	2.77259
BAG5	2	3	1	2	0	0	0.0446664	0.69875	0
BCL7C	2	3	0	0	3	1	0.0446664	0.69875	2.07944
C16orf93	2	3	3	0	0	0	0.0446664	0.69875	0
C2orf18	2	3	0	1	2	3	0.0446664	0.69875	-1.03133
C3orf65	2	3	3	0	0	0	0.0446664	0.69875	0
CCL18	2	3	0	0	3	0	0.0446664	0.69875	2.77259
CEBPD	2	3	2	1	0	0	0.0446664	0.69875	0
CXADR	2	3	0	0	3	2	0.0446664	0.69875	1.03133
D4S234E	2	3	1	0	2	0	0.0446664	0.69875	1.74126
EGLN2	2	3	1	0	2	0	0.0446664	0.69875	1.74126
EZR	2	3	0	0	3	0	0.0446664	0.69875	2.77259
FBXW9	2	3	1	1	1	0	0.0446664	0.69875	0.693147
GLI1	2	3	0	0	3	1	0.0446664	0.69875	2.07944
HCST	2	3	0	1	2	0	0.0446664	0.69875	1.74126
HIST1H1D	2	3	2	1	0	0	0.0446664	0.69875	0
HK2	2	3	0	0	3	0	0.0446664	0.69875	2.77259
HSD11B2	2	3	0	0	3	2	0.0446664	0.69875	1.03133
ING1	2	3	1	2	0	1	0.0446664	0.69875	-0.693147
LHX4	2	3	0	1	2	2	0.0446664	0.69875	0
MOBKL3	2	3	1	1	1	1	0.0446664	0.69875	0
OCEL1	2	3	1	2	0	1	0.0446664	0.69875	-0.693147
PDCD6	2	3	1	2	0	1	0.0446664	0.69875	-0.693147
PIM1	2	3	2	0	1	0	0.0446664	0.69875	0.693147
PLD4	2	3	2	1	0	0	0.0446664	0.69875	0
PPOX	2	3	1	0	2	1	0.0446664	0.69875	1.04811
PRELP	2	3	2	1	0	0	0.0446664	0.69875	0
PTTG1IP	2	3	0	0	3	1	0.0446664	0.69875	2.07944
RECQL4	2	3	0	2	1	0	0.0446664	0.69875	0.693147
RELL2	2	3	1	2	0	0	0.0446664	0.69875	0
RNF40	2	3	2	0	1	1	0.0446664	0.69875	0
RPE	2	3	1	0	2	0	0.0446664	0.69875	1.74126
SLC25A1	2	3	2	0	1	0	0.0446664	0.69875	0.693147
SMOC2	2	3	1	1	1	0	0.0446664	0.69875	0.693147
SNORD49B	2	3	1	2	0	0	0.0446664	0.69875	0
TCL6	2	3	2	0	1	0	0.0446664	0.69875	0.693147
UCKL1	2	3	0	0	3	1	0.0446664	0.69875	2.07944
VPS26A	2	3	0	0	3	2	0.0446664	0.69875	1.03133
VPS35	2	3	0	0	3	1	0.0446664	0.69875	2.07944
ZC3HAV1L	2	3	0	2	1	2	0.0446664	0.69875	-1.04811
ZNF10	2	3	0	0	3	1	0.0446664	0.69875	2.07944
ZNF182	2	3	1	1	1	2	0.0446664	0.69875	-1.04811
ZXDB	2	3	2	1	0	0	0.0446664	0.69875	0
DEPDC5	28	12	0	0	12	5	0.0470683	0.734031	4.85981
PRR5-ARHGAP8	28	12	0	0	12	9	0.0470683	0.734031	1.84242
LOXL3	35	14	2	3	9	4	0.0494575	0.759682	3.91202
WDR76	35	14	6	3	5	8	0.0494575	0.759682	-2.33341
HDDC3	25	11	5	3	3	1	0.0494996	0.759682	2.07944
MIP	25	11	6	5	0	0	0.0494996	0.759682	0
WRAP53	49	18	1	1	16	16	0.0501638	0.759682	0
ZBTB7B	49	18	5	2	11	11	0.0501638	0.759682	0
ANAPC5	42	16	0	0	16	13	0.0503075	0.759682	1.53283
BCMO1	7	5	1	0	4	2	0.0504583	0.759682	1.99574
CBLN3	7	5	2	3	0	0	0.0504583	0.759682	0
CCDC88C	7	5	1	0	4	5	0.0504583	0.759682	-0.894632
F2R	7	5	0	0	5	0	0.0504583	0.759682	4.63163
INO80E	7	5	0	0	5	6	0.0504583	0.759682	-0.831229
INPPL1	7	5	0	0	5	5	0.0504583	0.759682	0
ITGB1BP1	7	5	0	0	5	0	0.0504583	0.759682	4.63163
LMNB2	7	5	4	0	1	1	0.0504583	0.759682	0
LOC152217	7	5	3	2	0	0	0.0504583	0.759682	0
LOC202781	7	5	3	2	0	0	0.0504583	0.759682	0
PARP3	7	5	1	1	3	0	0.0504583	0.759682	2.77259
PEG10	7	5	1	0	4	0	0.0504583	0.759682	3.737
SNAP29	7	5	1	0	4	1	0.0504583	0.759682	3.04385
TMEM38A	7	5	1	0	4	3	0.0504583	0.759682	0.96441
TXNDC17	7	5	1	0	4	2	0.0504583	0.759682	1.99574
ZNF638	7	5	0	0	5	2	0.0504583	0.759682	2.89037
TNFRSF11A	112	35	8	5	22	26	0.0505712	0.760239	-1.48773
APOLD1	22	10	3	5	2	6	0.0517897	0.776225	-3.7216
SLC16A5	22	10	1	0	9	3	0.0517897	0.776225	4.87643
GGNBP2	32	13	1	1	11	9	0.0526376	0.786579	1.25928
UBR2	32	13	0	1	12	8	0.0526376	0.786579	2.5264
CARM1	75	25	0	0	25	29	0.0537789	0.790502	-1.37482
CDH8	19	9	0	0	9	3	0.0537854	0.790502	4.87643
FLAD1	19	9	4	2	3	2	0.0537854	0.790502	1.03133
HOXA11AS	19	9	2	2	5	3	0.0537854	0.790502	1.85904
RASSF1	19	9	0	1	8	2	0.0537854	0.790502	5.22378
TDRD3	19	9	3	0	6	2	0.0537854	0.790502	3.7216
TLE3	19	9	2	1	6	2	0.0537854	0.790502	3.7216
ZBTB45	19	9	1	2	6	3	0.0537854	0.790502	2.69027
MMP24	179	52	2	0	50	39	0.0538487	0.790502	2.67104
BRWD3	10	6	0	2	4	1	0.0545825	0.790502	3.04385
FAM120A	10	6	1	0	5	4	0.0545825	0.790502	0.894632
GNA13	10	6	0	2	4	3	0.0545825	0.790502	0.96441
ISOC2	10	6	0	0	6	4	0.0545825	0.790502	1.72586
KIAA0652	10	6	2	1	3	0	0.0545825	0.790502	2.77259
KLHL17	10	6	4	1	1	1	0.0545825	0.790502	0
LEF1	10	6	1	1	4	0	0.0545825	0.790502	3.737
LOC100009676	10	6	4	2	0	0	0.0545825	0.790502	0
MAPKBP1	10	6	0	2	4	3	0.0545825	0.790502	0.96441
THOC4	10	6	1	2	3	8	0.0545825	0.790502	-4.19245
WNT3	10	6	0	1	5	3	0.0545825	0.790502	1.85904
CUL5	16	8	0	2	6	2	0.0552399	0.790502	3.7216
MAGEC3	16	8	0	0	8	1	0.0552399	0.790502	6.27189
PIP5K1B	16	8	0	0	8	5	0.0552399	0.790502	2.33341
SLC20A1	16	8	3	3	2	0	0.0552399	0.790502	1.74126
SVIL	16	8	0	1	7	6	0.0552399	0.790502	0.775464
C17orf89	13	7	1	0	6	2	0.0557425	0.790502	3.7216
C7orf42	13	7	0	0	7	1	0.0557425	0.790502	5.54518
CNNM4	13	7	2	5	0	0	0.0557425	0.790502	0
EFCAB4B	13	7	0	0	7	6	0.0557425	0.790502	0.775464
FLJ39582	13	7	5	2	0	1	0.0557425	0.790502	-0.693147
GABPB2	13	7	2	2	3	4	0.0557425	0.790502	-0.96441
LOC139201	13	7	3	1	3	5	0.0557425	0.790502	-1.85904
QTRT1	13	7	3	0	4	2	0.0557425	0.790502	1.99574
RPP25	13	7	4	3	0	0	0.0557425	0.790502	0
SFRS11	13	7	0	0	7	6	0.0557425	0.790502	0.775464
USP28	13	7	0	0	7	3	0.0557425	0.790502	3.46574
DSCR3	68	23	0	0	23	12	0.0560168	0.793268	5.07982
RNF207	50	18	3	2	13	9	0.0570486	0.806738	2.39881
ABCA3	26	11	0	0	11	5	0.0592897	0.834892	4.27667
HOXB2	26	11	2	3	6	2	0.0592897	0.834892	3.7216
PABPN1	26	11	2	6	3	4	0.0592897	0.834892	-0.96441
GNL3L	47	17	10	6	1	8	0.0613612	0.836908	-6.27189
LOC100131691	47	17	0	4	13	14	0.0613612	0.836908	-0.532228
MORF4L1	99	31	0	1	30	22	0.0615207	0.836908	2.82904
SMARCA4	40	15	0	0	15	8	0.0620624	0.836908	4.12532
CHD3	84	27	2	5	20	27	0.0625341	0.836908	-2.64658
C12orf65	23	10	1	2	7	6	0.0626449	0.836908	0.775464
MYO19	23	10	4	4	2	2	0.0626449	0.836908	0
ZBTB38	23	10	0	0	10	3	0.0626449	0.836908	5.52277
ACE	5	4	1	0	3	2	0.0631357	0.836908	1.03133
ANKLE2	5	4	0	0	4	1	0.0631357	0.836908	3.04385
BIVM	5	4	0	0	4	0	0.0631357	0.836908	3.737
C16orf71	5	4	0	0	4	2	0.0631357	0.836908	1.99574
C1R	5	4	0	1	3	0	0.0631357	0.836908	2.77259
CCDC159	5	4	0	0	4	1	0.0631357	0.836908	3.04385
CHDH	5	4	0	2	2	1	0.0631357	0.836908	1.04811
CSRNP2	5	4	0	0	4	3	0.0631357	0.836908	0.96441
EFNA2	5	4	0	0	4	0	0.0631357	0.836908	3.737
ERLIN2	5	4	1	1	2	1	0.0631357	0.836908	1.04811
FLCN	5	4	0	0	4	0	0.0631357	0.836908	3.737
GPX1	5	4	1	3	0	0	0.0631357	0.836908	0
GSTZ1	5	4	1	0	3	2	0.0631357	0.836908	1.03133
IMPG1	5	4	0	0	4	1	0.0631357	0.836908	3.04385
KIAA0802	5	4	0	0	4	1	0.0631357	0.836908	3.04385
LIPT2	5	4	1	2	1	0	0.0631357	0.836908	0.693147
LMX1B	5	4	4	0	0	1	0.0631357	0.836908	-0.693147
LOC148189	5	4	2	1	1	0	0.0631357	0.836908	0.693147
MFSD3	5	4	1	3	0	0	0.0631357	0.836908	0
PEX2	5	4	1	0	3	0	0.0631357	0.836908	2.77259
PPP1CC	5	4	1	1	2	2	0.0631357	0.836908	0
PRKAB1	5	4	0	0	4	1	0.0631357	0.836908	3.04385
PROSC	5	4	0	0	4	2	0.0631357	0.836908	1.99574
RANBP10	5	4	0	0	4	0	0.0631357	0.836908	3.737
RARA	5	4	0	0	4	3	0.0631357	0.836908	0.96441
REEP1	5	4	0	0	4	2	0.0631357	0.836908	1.99574
ROCK2	5	4	0	1	3	1	0.0631357	0.836908	2.07944
SLC39A3	5	4	0	0	4	2	0.0631357	0.836908	1.99574
STAC	5	4	0	0	4	4	0.0631357	0.836908	0
TBX2	5	4	2	2	0	1	0.0631357	0.836908	-0.693147
UBE2Q2P1	5	4	4	0	0	0	0.0631357	0.836908	0
ZFP161	5	4	1	0	3	1	0.0631357	0.836908	2.07944
ZNF639	5	4	0	0	4	1	0.0631357	0.836908	3.04385
CUX1	30	12	1	0	11	6	0.065842	0.836908	3.44544
KLHL22	30	12	0	0	12	6	0.065842	0.836908	4.02858
SEPT2	30	12	2	2	8	2	0.065842	0.836908	5.22378
TMEM87A	30	12	0	0	12	5	0.065842	0.836908	4.85981
STRADA	20	9	0	0	9	1	0.0658724	0.836908	6.95587
STRN3	20	9	2	3	4	4	0.0658724	0.836908	0
ATN1	37	14	0	4	10	6	0.0666428	0.836908	2.83249
C1orf43	66	22	0	7	15	20	0.0671232	0.836908	-2.28215
STAG2	55	19	1	2	16	14	0.0674414	0.836908	1.0006
ACTN4	17	8	1	1	6	5	0.0687644	0.836908	0.831229
C3orf63	17	8	2	0	6	8	0.0687644	0.836908	-1.50218
CDKN2C	17	8	3	0	5	1	0.0687644	0.836908	3.93848
TMEM101	17	8	0	2	6	2	0.0687644	0.836908	3.7216
TOMM40L	17	8	4	1	3	5	0.0687644	0.836908	-1.85904
MSH5	48	17	6	3	8	8	0.0695665	0.836908	0
USP48	89	28	1	2	25	23	0.0698864	0.836908	0.743229
AGAP1	8	5	0	0	5	3	0.0700836	0.836908	1.85904
BLOC1S1	8	5	1	2	2	3	0.0700836	0.836908	-1.03133
BOC	8	5	1	0	4	1	0.0700836	0.836908	3.04385
C6orf47	8	5	2	3	0	0	0.0700836	0.836908	0
CCDC9	8	5	0	2	3	0	0.0700836	0.836908	2.77259
CLEC11A	8	5	2	3	0	1	0.0700836	0.836908	-0.693147
GFPT2	8	5	0	0	5	3	0.0700836	0.836908	1.85904
HMGB1	8	5	1	0	4	0	0.0700836	0.836908	3.737
HOXA11	8	5	3	1	1	1	0.0700836	0.836908	0
LRDD	8	5	0	0	5	2	0.0700836	0.836908	2.89037
LRRC24	8	5	2	3	0	2	0.0700836	0.836908	-1.74126
MAGEF1	8	5	1	4	0	0	0.0700836	0.836908	0
MESDC2	8	5	1	1	3	1	0.0700836	0.836908	2.07944
OTUB1	8	5	1	3	1	3	0.0700836	0.836908	-2.07944
PRDX2	8	5	2	1	2	1	0.0700836	0.836908	1.04811
PTPN18	8	5	1	3	1	1	0.0700836	0.836908	0
RNF213	8	5	0	0	5	3	0.0700836	0.836908	1.85904
TMEM63A	8	5	0	2	3	1	0.0700836	0.836908	2.07944
TMEM64	8	5	2	1	2	0	0.0700836	0.836908	1.74126
TUFT1	8	5	0	0	5	1	0.0700836	0.836908	3.93848
UROC1	8	5	0	1	4	1	0.0700836	0.836908	3.04385
ZKSCAN5	8	5	1	0	4	2	0.0700836	0.836908	1.99574
NUAK2	27	11	3	1	7	10	0.070271	0.836908	-2.05703
TMEM107	27	11	4	3	4	1	0.070271	0.836908	3.04385
AP4S1	14	7	0	1	6	3	0.0709619	0.836908	2.69027
ASXL1	14	7	2	1	4	2	0.0709619	0.836908	1.99574
C7orf68	14	7	0	1	6	2	0.0709619	0.836908	3.7216
C8orf51	14	7	3	4	0	0	0.0709619	0.836908	0
DAZAP1	14	7	0	0	7	5	0.0709619	0.836908	1.60669
DDN	14	7	0	1	6	0	0.0709619	0.836908	5.46286
DHX34	14	7	0	0	7	6	0.0709619	0.836908	0.775464
FAM120AOS	14	7	2	4	1	3	0.0709619	0.836908	-2.07944
HMHA1	14	7	1	1	5	2	0.0709619	0.836908	2.89037
JUB	14	7	1	2	4	4	0.0709619	0.836908	0
PPFIA3	14	7	0	1	6	5	0.0709619	0.836908	0.831229
PRDM12	14	7	2	4	1	0	0.0709619	0.836908	0.693147
RFX5	14	7	1	3	3	0	0.0709619	0.836908	2.77259
SULF1	14	7	0	0	7	0	0.0709619	0.836908	6.23832
RCAN3	41	15	6	7	2	4	0.0710823	0.836908	-1.99574
TMCC1	41	15	1	0	14	9	0.0710823	0.836908	2.93103
MIB1	34	13	0	0	13	6	0.0715618	0.836908	4.58497
AES	11	6	2	2	2	4	0.0718168	0.836908	-1.99574
ANKRD31	11	6	2	1	3	3	0.0718168	0.836908	0
APEX1	11	6	1	2	3	1	0.0718168	0.836908	2.07944
ATF3	11	6	0	0	6	0	0.0718168	0.836908	5.46286
ATP5S	11	6	2	1	3	2	0.0718168	0.836908	1.03133
C1orf163	11	6	2	1	3	2	0.0718168	0.836908	1.03133
CAPN1	11	6	0	0	6	6	0.0718168	0.836908	0
EI24	11	6	0	0	6	2	0.0718168	0.836908	3.7216
FUNDC2	11	6	0	0	6	5	0.0718168	0.836908	0.831229
GPR173	11	6	0	0	6	3	0.0718168	0.836908	2.69027
LOC400027	11	6	3	3	0	0	0.0718168	0.836908	0
NCRNA00095	11	6	1	5	0	0	0.0718168	0.836908	0
NDUFAF3	11	6	1	4	1	0	0.0718168	0.836908	0.693147
NMNAT3	11	6	1	1	4	1	0.0718168	0.836908	3.04385
P2RX5	11	6	2	2	2	5	0.0718168	0.836908	-2.89037
PCCB	11	6	0	0	6	5	0.0718168	0.836908	0.831229
PPP1R3F	11	6	4	2	0	1	0.0718168	0.836908	-0.693147
PSME4	11	6	1	1	4	2	0.0718168	0.836908	1.99574
RFC4	11	6	2	2	2	2	0.0718168	0.836908	0
SLC22A18	11	6	0	0	6	0	0.0718168	0.836908	5.46286
ZMYM5	11	6	0	0	6	4	0.0718168	0.836908	1.72586
CSNK1G1	52	18	0	0	18	17	0.0727233	0.836908	0.45513
MOV10L1	82	26	0	0	26	14	0.0738694	0.836908	5.09128
WWTR1	109	33	0	0	33	21	0.0745002	0.836908	4.15594
PRR19	24	10	0	0	10	8	0.0748623	0.836908	1.33032
SHISA5	24	10	0	1	9	9	0.0748623	0.836908	0
RAI1	45	16	1	0	15	16	0.075006	0.836908	-0.490299
CSK	38	14	2	0	12	13	0.0765578	0.836908	-0.556387
LOC100271722	38	14	3	2	9	5	0.0765578	0.836908	3.01739
DCUN1D3	31	12	0	1	11	9	0.0768347	0.836908	1.25928
EIF4EBP1	31	12	0	0	12	8	0.0768347	0.836908	2.5264
ADCY3	3	3	1	0	2	0	0.0774342	0.836908	1.74126
ASB1	3	3	0	0	3	0	0.0774342	0.836908	2.77259
B4GALNT3	3	3	0	0	3	2	0.0774342	0.836908	1.03133
BEX4	3	3	1	2	0	0	0.0774342	0.836908	0
C13orf31	3	3	0	1	2	1	0.0774342	0.836908	1.04811
C8orf39	3	3	1	2	0	0	0.0774342	0.836908	0
C9orf50	3	3	0	2	1	0	0.0774342	0.836908	0.693147
CA2	3	3	0	0	3	2	0.0774342	0.836908	1.03133
CD180	3	3	3	0	0	0	0.0774342	0.836908	0
CES3	3	3	1	0	2	1	0.0774342	0.836908	1.04811
CXXC1	3	3	0	0	3	0	0.0774342	0.836908	2.77259
DCAF4	3	3	0	0	3	3	0.0774342	0.836908	0
EXTL1	3	3	2	0	1	2	0.0774342	0.836908	-1.04811
FITM2	3	3	0	0	3	0	0.0774342	0.836908	2.77259
GEFT	3	3	0	0	3	2	0.0774342	0.836908	1.03133
GPRC5C	3	3	0	2	1	1	0.0774342	0.836908	0
HOXA1	3	3	1	2	0	0	0.0774342	0.836908	0
HSD17B14	3	3	1	1	1	4	0.0774342	0.836908	-3.04385
ILVBL	3	3	0	0	3	0	0.0774342	0.836908	2.77259
KDELR1	3	3	0	0	3	7	0.0774342	0.836908	-3.46574
KIF3C	3	3	2	0	1	3	0.0774342	0.836908	-2.07944
LRIG2	3	3	1	0	2	1	0.0774342	0.836908	1.04811
MGC45800	3	3	2	0	1	0	0.0774342	0.836908	0.693147
NUP210L	3	3	0	0	3	0	0.0774342	0.836908	2.77259
NXT1	3	3	1	0	2	0	0.0774342	0.836908	1.74126
PARP10	3	3	2	1	0	1	0.0774342	0.836908	-0.693147
PFKFB4	3	3	0	0	3	2	0.0774342	0.836908	1.03133
PHC1	3	3	0	0	3	0	0.0774342	0.836908	2.77259
PHF2	3	3	0	0	3	1	0.0774342	0.836908	2.07944
PRPF4B	3	3	2	0	1	1	0.0774342	0.836908	0
PVR	3	3	1	0	2	0	0.0774342	0.836908	1.74126
RNF138P1	3	3	0	3	0	0	0.0774342	0.836908	0
SAT2	3	3	1	0	2	1	0.0774342	0.836908	1.04811
SIGIRR	3	3	0	1	2	0	0.0774342	0.836908	1.74126
SLC12A9	3	3	3	0	0	0	0.0774342	0.836908	0
SNX27	3	3	0	0	3	3	0.0774342	0.836908	0
SOX4	3	3	2	1	0	0	0.0774342	0.836908	0
SRM	3	3	1	1	1	1	0.0774342	0.836908	0
SRPRB	3	3	0	0	3	0	0.0774342	0.836908	2.77259
SSC5D	3	3	2	0	1	0	0.0774342	0.836908	0.693147
TSSK6	3	3	1	2	0	0	0.0774342	0.836908	0
TXNDC16	3	3	0	0	3	3	0.0774342	0.836908	0
UBE3A	3	3	0	0	3	1	0.0774342	0.836908	2.07944
VPS11	3	3	0	2	1	0	0.0774342	0.836908	0.693147
WDR53	3	3	0	0	3	1	0.0774342	0.836908	2.07944
YTHDC2	3	3	0	0	3	1	0.0774342	0.836908	2.07944
ZFPM2	3	3	0	0	3	2	0.0774342	0.836908	1.03133
ZNF254	3	3	0	0	3	0	0.0774342	0.836908	2.77259
HUWE1	49	17	0	0	17	5	0.0784758	0.836908	7.421
STAG1	79	25	0	1	24	18	0.0795288	0.836908	2.44023
CFDP1	21	9	0	0	9	4	0.0795349	0.836908	3.91202
CXorf42	21	9	2	5	2	4	0.0795349	0.836908	-1.99574
PKN3	21	9	0	0	9	3	0.0795349	0.836908	4.87643
RS1	21	9	0	0	9	4	0.0795349	0.836908	3.91202
C17orf90	28	11	1	0	10	6	0.0824698	0.836908	2.83249
CHIC1	28	11	1	4	6	5	0.0824698	0.836908	0.831229
CSAD	28	11	1	1	9	11	0.0824698	0.836908	-1.25928
TRAF3IP2	28	11	2	2	7	9	0.0824698	0.836908	-1.4107
AFG3L1	18	8	0	1	7	6	0.0841398	0.836908	0.775464
BTF3L4	18	8	0	0	8	2	0.0841398	0.836908	5.22378
CBS	18	8	1	0	7	2	0.0841398	0.836908	4.49707
COPS7A	18	8	5	2	1	3	0.0841398	0.836908	-2.07944
CREB3L4	18	8	2	4	2	2	0.0841398	0.836908	0
IRAK1	18	8	3	2	3	5	0.0841398	0.836908	-1.85904
KIAA0182	18	8	0	0	8	2	0.0841398	0.836908	5.22378
NECAB1	18	8	0	0	8	6	0.0841398	0.836908	1.50218
RP1-177G6.2	18	8	2	1	5	2	0.0841398	0.836908	2.89037
UBE2D2	18	8	0	0	8	8	0.0841398	0.836908	0
UNKL	18	8	0	0	8	6	0.0841398	0.836908	1.50218
ZHX2	18	8	1	0	7	2	0.0841398	0.836908	4.49707
DKFZP686I15217	57	19	8	11	0	0	0.0842629	0.836908	0
SLTM	46	16	0	1	15	5	0.0847506	0.836908	6.45872
ZNF292	46	16	1	0	15	7	0.0847506	0.836908	4.85203
ADCK2	1	2	1	1	0	0	0.0868303	0.836908	0
ALX4	1	2	1	0	1	0	0.0868303	0.836908	0.693147
APEH	1	2	1	0	1	1	0.0868303	0.836908	0
ARSJ	1	2	0	1	1	0	0.0868303	0.836908	0.693147
ASB13	1	2	0	0	2	0	0.0868303	0.836908	1.74126
ASCC2	1	2	0	0	2	1	0.0868303	0.836908	1.04811
ATG12	1	2	0	1	1	0	0.0868303	0.836908	0.693147
BNIP3	1	2	0	0	2	2	0.0868303	0.836908	0
BRPF1	1	2	0	0	2	1	0.0868303	0.836908	1.04811
C12orf34	1	2	0	0	2	2	0.0868303	0.836908	0
C17orf64	1	2	0	1	1	0	0.0868303	0.836908	0.693147
C1orf113	1	2	0	0	2	1	0.0868303	0.836908	1.04811
C21orf45	1	2	0	0	2	0	0.0868303	0.836908	1.74126
C4orf14	1	2	0	2	0	0	0.0868303	0.836908	0
C4orf51	1	2	1	1	0	0	0.0868303	0.836908	0
CAMK2G	1	2	1	1	0	0	0.0868303	0.836908	0
CAMK2N1	1	2	0	2	0	0	0.0868303	0.836908	0
CCDC102A	1	2	0	0	2	1	0.0868303	0.836908	1.04811
CCL28	1	2	0	0	2	0	0.0868303	0.836908	1.74126
CD8A	1	2	0	0	2	0	0.0868303	0.836908	1.74126
CDK16	1	2	0	2	0	2	0.0868303	0.836908	-1.74126
COL23A1	1	2	0	0	2	1	0.0868303	0.836908	1.04811
CRELD1	1	2	0	1	1	0	0.0868303	0.836908	0.693147
CSTF2T	1	2	1	1	0	0	0.0868303	0.836908	0
CYP2R1	1	2	0	0	2	1	0.0868303	0.836908	1.04811
DBI	1	2	0	0	2	1	0.0868303	0.836908	1.04811
DCXR	1	2	1	1	0	1	0.0868303	0.836908	-0.693147
DNAJB2	1	2	0	2	0	2	0.0868303	0.836908	-1.74126
DPH2	1	2	1	1	0	0	0.0868303	0.836908	0
DTX3L	1	2	2	0	0	1	0.0868303	0.836908	-0.693147
EFNB1	1	2	1	0	1	2	0.0868303	0.836908	-1.04811
EXTL2	1	2	0	0	2	3	0.0868303	0.836908	-1.03133
FAM108B1	1	2	0	0	2	0	0.0868303	0.836908	1.74126
FAM122B	1	2	1	1	0	0	0.0868303	0.836908	0
FAM171A2	1	2	0	0	2	0	0.0868303	0.836908	1.74126
FBXO44	1	2	1	0	1	0	0.0868303	0.836908	0.693147
FLJ10357	1	2	0	0	2	1	0.0868303	0.836908	1.04811
FZD1	1	2	0	2	0	0	0.0868303	0.836908	0
GALM	1	2	0	0	2	2	0.0868303	0.836908	0
GCNT3	1	2	1	1	0	0	0.0868303	0.836908	0
GFAP	1	2	0	0	2	0	0.0868303	0.836908	1.74126
GLB1L2	1	2	0	0	2	1	0.0868303	0.836908	1.04811
GLUL	1	2	2	0	0	1	0.0868303	0.836908	-0.693147
GNG11	1	2	0	1	1	0	0.0868303	0.836908	0.693147
GRPEL1	1	2	0	0	2	0	0.0868303	0.836908	1.74126
HSD17B4	1	2	0	1	1	0	0.0868303	0.836908	0.693147
IMPA1	1	2	2	0	0	0	0.0868303	0.836908	0
JMJD8	1	2	1	1	0	0	0.0868303	0.836908	0
KCNJ5	1	2	0	0	2	0	0.0868303	0.836908	1.74126
KIAA1462	1	2	0	0	2	0	0.0868303	0.836908	1.74126
KTI12	1	2	1	1	0	0	0.0868303	0.836908	0
LOC100287227	1	2	1	1	0	0	0.0868303	0.836908	0
LOC253039	1	2	1	1	0	0	0.0868303	0.836908	0
LOC92659	1	2	1	0	1	0	0.0868303	0.836908	0.693147
LTC4S	1	2	0	2	0	0	0.0868303	0.836908	0
MAP1LC3B	1	2	1	0	1	1	0.0868303	0.836908	0
MESDC1	1	2	1	1	0	0	0.0868303	0.836908	0
MIR330	1	2	0	2	0	0	0.0868303	0.836908	0
MRPL37	1	2	1	0	1	0	0.0868303	0.836908	0.693147
MRS2	1	2	0	1	1	0	0.0868303	0.836908	0.693147
NAGPA	1	2	0	0	2	2	0.0868303	0.836908	0
NAT9	1	2	0	1	1	1	0.0868303	0.836908	0
NEU1	1	2	1	1	0	0	0.0868303	0.836908	0
NKX2-8	1	2	1	1	0	0	0.0868303	0.836908	0
NUDT17	1	2	2	0	0	0	0.0868303	0.836908	0
NUPR1	1	2	0	0	2	0	0.0868303	0.836908	1.74126
PALM3	1	2	1	0	1	0	0.0868303	0.836908	0.693147
PAPSS1	1	2	0	0	2	0	0.0868303	0.836908	1.74126
PPP2R1B	1	2	0	0	2	1	0.0868303	0.836908	1.04811
PRKACA	1	2	0	0	2	0	0.0868303	0.836908	1.74126
PTPRT	1	2	0	0	2	0	0.0868303	0.836908	1.74126
RBMX2	1	2	0	0	2	0	0.0868303	0.836908	1.74126
RGS3	1	2	0	0	2	0	0.0868303	0.836908	1.74126
RPRM	1	2	1	1	0	0	0.0868303	0.836908	0
RPS6KA3	1	2	0	0	2	2	0.0868303	0.836908	0
SCN4B	1	2	1	0	1	0	0.0868303	0.836908	0.693147
SESN2	1	2	1	0	1	2	0.0868303	0.836908	-1.04811
SF3B4	1	2	0	0	2	0	0.0868303	0.836908	1.74126
SLC16A3	1	2	0	0	2	3	0.0868303	0.836908	-1.03133
SLC25A22	1	2	1	0	1	0	0.0868303	0.836908	0.693147
SLC25A30	1	2	0	0	2	0	0.0868303	0.836908	1.74126
SLC2A3	1	2	0	0	2	0	0.0868303	0.836908	1.74126
SLC9A1	1	2	1	1	0	0	0.0868303	0.836908	0
SMPDL3A	1	2	2	0	0	1	0.0868303	0.836908	-0.693147
SNAPIN	1	2	0	1	1	0	0.0868303	0.836908	0.693147
SNORD24	1	2	1	1	0	0	0.0868303	0.836908	0
SPATA2	1	2	0	1	1	0	0.0868303	0.836908	0.693147
STYX	1	2	0	1	1	0	0.0868303	0.836908	0.693147
TBC1D20	1	2	1	0	1	0	0.0868303	0.836908	0.693147
TEKT2	1	2	1	0	1	0	0.0868303	0.836908	0.693147
TMEM120B	1	2	1	0	1	1	0.0868303	0.836908	0
TMEM145	1	2	0	1	1	0	0.0868303	0.836908	0.693147
TNIP2	1	2	0	1	1	2	0.0868303	0.836908	-1.04811
TP53I13	1	2	0	0	2	0	0.0868303	0.836908	1.74126
TRIB2	1	2	0	2	0	0	0.0868303	0.836908	0
TSPAN17	1	2	2	0	0	0	0.0868303	0.836908	0
UBE2A	1	2	1	0	1	1	0.0868303	0.836908	0
VPS33B	1	2	0	0	2	1	0.0868303	0.836908	1.04811
VPS39	1	2	0	0	2	0	0.0868303	0.836908	1.74126
WDR16	1	2	0	0	2	0	0.0868303	0.836908	1.74126
ZNF26	1	2	1	0	1	2	0.0868303	0.836908	-1.04811
ZNF350	1	2	0	0	2	1	0.0868303	0.836908	1.04811
ZNF517	1	2	0	0	2	3	0.0868303	0.836908	-1.03133
ZNF571	1	2	0	0	2	0	0.0868303	0.836908	1.74126
AXIN1	39	14	2	1	11	6	0.0873788	0.836908	3.44544
C19orf23	15	7	2	3	2	0	0.0884025	0.836908	1.74126
CCDC57	15	7	0	0	7	5	0.0884025	0.836908	1.60669
LOC285375	15	7	0	1	6	2	0.0884025	0.836908	3.7216
PRPSAP2	15	7	0	0	7	3	0.0884025	0.836908	3.46574
RASSF4	15	7	1	1	5	0	0.0884025	0.836908	4.63163
SRA1	15	7	2	3	2	1	0.0884025	0.836908	1.04811
TMCO4	15	7	0	0	7	3	0.0884025	0.836908	3.46574
FXYD6	25	10	0	1	9	1	0.0884626	0.836908	6.95587
KLHDC3	25	10	1	1	8	5	0.0884626	0.836908	2.33341
CTPS2	32	12	7	4	1	2	0.0889255	0.836908	-1.04811
HIGD2B	32	12	4	2	6	5	0.0889255	0.836908	0.831229
MLLT10	32	12	0	0	12	5	0.0889255	0.836908	4.85981
PIK3R2	32	12	2	0	10	11	0.0889255	0.836908	-0.612942
NFAT5	163	46	5	10	31	33	0.0893056	0.836908	-0.611549
ABHD5	6	4	0	0	4	1	0.0905278	0.836908	3.04385
ALDH3B1	6	4	1	0	3	1	0.0905278	0.836908	2.07944
ALG5	6	4	0	0	4	3	0.0905278	0.836908	0.96441
ATP11A	6	4	0	0	4	2	0.0905278	0.836908	1.99574
BAG1	6	4	1	0	3	0	0.0905278	0.836908	2.77259
C11orf83	6	4	1	3	0	0	0.0905278	0.836908	0
C13orf16	6	4	0	0	4	3	0.0905278	0.836908	0.96441
C13orf38	6	4	0	0	4	2	0.0905278	0.836908	1.99574
C17orf53	6	4	0	0	4	0	0.0905278	0.836908	3.737
C1orf190	6	4	0	2	2	0	0.0905278	0.836908	1.74126
C3orf78	6	4	0	1	3	1	0.0905278	0.836908	2.07944
C4orf38	6	4	2	2	0	0	0.0905278	0.836908	0
C7orf27	6	4	0	0	4	1	0.0905278	0.836908	3.04385
CEBPG	6	4	1	0	3	0	0.0905278	0.836908	2.77259
CLTA	6	4	0	1	3	5	0.0905278	0.836908	-1.85904
CSGALNACT1	6	4	0	0	4	2	0.0905278	0.836908	1.99574
CUTA	6	4	1	2	1	0	0.0905278	0.836908	0.693147
CXorf58	6	4	1	0	3	0	0.0905278	0.836908	2.77259
DHRS3	6	4	1	2	1	5	0.0905278	0.836908	-3.93848
DISP2	6	4	1	3	0	0	0.0905278	0.836908	0
FAM118A	6	4	0	3	1	0	0.0905278	0.836908	0.693147
LGALS3BP	6	4	1	0	3	4	0.0905278	0.836908	-0.96441
LOC150197	6	4	1	3	0	0	0.0905278	0.836908	0
LOC256880	6	4	2	2	0	0	0.0905278	0.836908	0
LOC388789	6	4	0	1	3	3	0.0905278	0.836908	0
LRRC59	6	4	0	1	3	2	0.0905278	0.836908	1.03133
METTL10	6	4	0	0	4	4	0.0905278	0.836908	0
MRPL54	6	4	0	0	4	3	0.0905278	0.836908	0.96441
NDRG3	6	4	0	0	4	0	0.0905278	0.836908	3.737
NIPA1	6	4	0	0	4	0	0.0905278	0.836908	3.737
NTNG2	6	4	1	1	2	0	0.0905278	0.836908	1.74126
OPRL1	6	4	1	0	3	2	0.0905278	0.836908	1.03133
PGGT1B	6	4	0	0	4	0	0.0905278	0.836908	3.737
PPT2	6	4	1	2	1	1	0.0905278	0.836908	0
PRKCSH	6	4	1	0	3	4	0.0905278	0.836908	-0.96441
PSAT1	6	4	1	1	2	1	0.0905278	0.836908	1.04811
PTPN13	6	4	0	0	4	2	0.0905278	0.836908	1.99574
RXRA	6	4	0	0	4	1	0.0905278	0.836908	3.04385
S100A4	6	4	0	2	2	1	0.0905278	0.836908	1.04811
TKTL1	6	4	1	3	0	0	0.0905278	0.836908	0
TMEM114	6	4	1	0	3	2	0.0905278	0.836908	1.03133
TP73	6	4	0	1	3	2	0.0905278	0.836908	1.03133
TSC22D4	6	4	2	1	1	0	0.0905278	0.836908	0.693147
WNT7A	6	4	0	0	4	1	0.0905278	0.836908	3.04385
ZCCHC14	6	4	0	0	4	0	0.0905278	0.836908	3.737
ZNF546	6	4	1	0	3	1	0.0905278	0.836908	2.07944
ZNF621	6	4	1	0	3	0	0.0905278	0.836908	2.77259
LOC100129387	54	18	6	12	0	0	0.0910405	0.836908	0
ISL2	43	15	1	1	13	4	0.0916073	0.836908	6.31083
C11orf35	12	6	0	0	6	2	0.0918015	0.836908	3.7216
C8orf58	12	6	3	2	1	1	0.0918015	0.836908	0
CRLF1	12	6	2	2	2	1	0.0918015	0.836908	1.04811
DLL3	12	6	0	5	1	2	0.0918015	0.836908	-1.04811
FRAT2	12	6	2	4	0	0	0.0918015	0.836908	0
GPCPD1	12	6	0	0	6	1	0.0918015	0.836908	4.76971
MRC2	12	6	0	0	6	0	0.0918015	0.836908	5.46286
PC	12	6	0	0	6	3	0.0918015	0.836908	2.69027
PRSS30P	12	6	4	2	0	0	0.0918015	0.836908	0
ST7	12	6	0	0	6	1	0.0918015	0.836908	4.76971
TPI1P2	12	6	3	3	0	0	0.0918015	0.836908	0
ADORA2B	9	5	2	2	1	3	0.093287	0.836908	-2.07944
APOF	9	5	3	2	0	0	0.093287	0.836908	0
ARHGAP5	9	5	0	0	5	2	0.093287	0.836908	2.89037
BBS1	9	5	1	0	4	2	0.093287	0.836908	1.99574
C1orf56	9	5	3	2	0	1	0.093287	0.836908	-0.693147
GPSM1	9	5	0	0	5	5	0.093287	0.836908	0
GTPBP3	9	5	1	2	2	1	0.093287	0.836908	1.04811
IBTK	9	5	0	1	4	1	0.093287	0.836908	3.04385
ITFG3	9	5	0	0	5	1	0.093287	0.836908	3.93848
KLHL1	9	5	1	1	3	1	0.093287	0.836908	2.07944
LRP5	9	5	0	0	5	3	0.093287	0.836908	1.85904
MTRF1	9	5	1	0	4	0	0.093287	0.836908	3.737
NEURL2	9	5	2	3	0	0	0.093287	0.836908	0
NOTCH4	9	5	0	1	4	1	0.093287	0.836908	3.04385
PIGO	9	5	3	1	1	0	0.093287	0.836908	0.693147
RPS26	9	5	3	0	2	2	0.093287	0.836908	0
SLC35F2	9	5	1	0	4	2	0.093287	0.836908	1.99574
SLC37A4	9	5	0	3	2	4	0.093287	0.836908	-1.99574
SLC4A2	9	5	0	0	5	2	0.093287	0.836908	2.89037
TBC1D7	9	5	0	0	5	1	0.093287	0.836908	3.93848
TNFRSF10A	9	5	0	0	5	2	0.093287	0.836908	2.89037
TRAF4	9	5	1	0	4	6	0.093287	0.836908	-1.72586
TRIM7	9	5	1	1	3	0	0.093287	0.836908	2.77259
ZFP30	9	5	0	2	3	0	0.093287	0.836908	2.77259
ST3GAL2	36	13	4	6	3	2	0.0944216	0.846329	1.03133
DGKZ	22	9	0	0	9	4	0.0947846	0.847307	3.91202
IFT88	22	9	0	0	9	6	0.0947846	0.847307	2.18616
KIAA1530	22	9	1	1	7	6	0.0947846	0.847307	0.775464
CBARA1	47	16	0	0	16	11	0.0952724	0.850448	2.67236
C14orf176	29	11	6	3	2	4	0.0958979	0.850448	-1.99574
IFRD2	29	11	0	1	10	10	0.0958979	0.850448	0
TEF	29	11	1	1	9	8	0.0958979	0.850448	0.683985
NSMAF	40	14	1	0	13	9	0.0991146	0.850448	2.39881
PIGW	40	14	4	4	6	5	0.0991146	0.850448	0.831229
FADS2	19	8	0	5	3	4	0.101362	0.850448	-0.96441
RAF1	19	8	1	0	7	2	0.101362	0.850448	4.49707
RCAN1	19	8	0	0	8	2	0.101362	0.850448	5.22378
SLC43A1	19	8	0	2	6	7	0.101362	0.850448	-0.775464
COL4A6	33	12	0	0	12	9	0.102121	0.850448	1.84242
TFAP2C	44	15	2	4	9	11	0.103132	0.850448	-1.25928
CCDC77	26	10	0	0	10	8	0.103448	0.850448	1.33032
PRTFDC1	26	10	2	1	7	7	0.103448	0.850448	0
DCAF6	16	7	0	0	7	4	0.108032	0.850448	2.50133
DNAL1	16	7	0	0	7	4	0.108032	0.850448	2.50133
EML3	16	7	2	0	5	4	0.108032	0.850448	0.894632
HIST1H2BD	16	7	1	1	5	0	0.108032	0.850448	4.63163
ICA1L	16	7	0	0	7	2	0.108032	0.850448	4.49707
METTL12	16	7	3	3	1	4	0.108032	0.850448	-3.04385
NT5C2	16	7	0	0	7	5	0.108032	0.850448	1.60669
OLFM2	16	7	0	0	7	3	0.108032	0.850448	3.46574
PRKCE	16	7	0	0	7	4	0.108032	0.850448	2.50133
SMARCD2	16	7	0	0	7	3	0.108032	0.850448	3.46574
LOC285847	52	17	3	6	8	18	0.109533	0.850448	-5.54273
C8orf38	23	9	0	0	9	4	0.111609	0.850448	3.91202
COG8	23	9	1	2	6	5	0.111609	0.850448	0.831229
MGC3771	23	9	0	0	9	6	0.111609	0.850448	2.18616
ADNP	41	14	0	0	14	8	0.111767	0.850448	3.61502
RUNX2	41	14	0	0	14	6	0.111767	0.850448	5.1172
C19orf45	13	6	0	1	5	4	0.114451	0.850448	0.894632
C1orf156	13	6	1	2	3	2	0.114451	0.850448	1.03133
CUL7	13	6	0	2	4	2	0.114451	0.850448	1.99574
GLRA3	13	6	0	0	6	2	0.114451	0.850448	3.7216
HDAC8	13	6	0	0	6	3	0.114451	0.850448	2.69027
NQO1	13	6	0	0	6	4	0.114451	0.850448	1.72586
PCM1	13	6	0	0	6	2	0.114451	0.850448	3.7216
PSPC1	13	6	3	1	2	3	0.114451	0.850448	-1.03133
RPS16	13	6	1	0	5	2	0.114451	0.850448	2.89037
SIX5	13	6	1	4	1	2	0.114451	0.850448	-1.04811
STC2	13	6	4	1	1	0	0.114451	0.850448	0.693147
TOPORS	13	6	0	0	6	2	0.114451	0.850448	3.7216
ADAM12	95	28	0	0	28	17	0.114609	0.850448	4.30563
NEDD4L	99	29	0	0	29	22	0.115068	0.850448	2.5057
ANP32A	119	34	0	0	34	23	0.116062	0.850448	3.66513
IGDCC3	34	12	0	0	12	12	0.116417	0.850448	0
ARL4C	4	3	2	1	0	0	0.117667	0.850448	0
ATPIF1	4	3	2	1	0	0	0.117667	0.850448	0
BLVRB	4	3	0	0	3	4	0.117667	0.850448	-0.96441
BSCL2	4	3	0	0	3	0	0.117667	0.850448	2.77259
C16orf13	4	3	1	2	0	1	0.117667	0.850448	-0.693147
CD302	4	3	0	0	3	1	0.117667	0.850448	2.07944
CHSY3	4	3	0	1	2	1	0.117667	0.850448	1.04811
COMP	4	3	0	1	2	1	0.117667	0.850448	1.04811
COX6B1	4	3	0	0	3	2	0.117667	0.850448	1.03133
CSF1	4	3	0	2	1	0	0.117667	0.850448	0.693147
DHX36	4	3	0	0	3	4	0.117667	0.850448	-0.96441
DNASE2	4	3	2	0	1	0	0.117667	0.850448	0.693147
EEF1E1	4	3	0	0	3	3	0.117667	0.850448	0
FAM19A2	4	3	1	0	2	1	0.117667	0.850448	1.04811
FBXL8	4	3	0	0	3	0	0.117667	0.850448	2.77259
FBXO6	4	3	0	0	3	2	0.117667	0.850448	1.03133
GCSH	4	3	0	0	3	2	0.117667	0.850448	1.03133
GOLPH3L	4	3	0	0	3	0	0.117667	0.850448	2.77259
GSTP1	4	3	0	0	3	3	0.117667	0.850448	0
H2AFX	4	3	0	3	0	0	0.117667	0.850448	0
HYAL3	4	3	1	1	1	1	0.117667	0.850448	0
IKZF5	4	3	0	0	3	2	0.117667	0.850448	1.03133
KIAA0495	4	3	2	1	0	0	0.117667	0.850448	0
KIAA1279	4	3	1	0	2	1	0.117667	0.850448	1.04811
KIAA1383	4	3	0	3	0	0	0.117667	0.850448	0
KIAA1715	4	3	0	0	3	0	0.117667	0.850448	2.77259
LOC100329108	4	3	0	0	3	2	0.117667	0.850448	1.03133
MAN1A2	4	3	0	1	2	0	0.117667	0.850448	1.74126
MED29	4	3	0	1	2	1	0.117667	0.850448	1.04811
MGC16275	4	3	3	0	0	0	0.117667	0.850448	0
MIF	4	3	3	0	0	1	0.117667	0.850448	-0.693147
MRPL53	4	3	1	2	0	0	0.117667	0.850448	0
MSR1	4	3	0	0	3	0	0.117667	0.850448	2.77259
NAT14	4	3	0	0	3	2	0.117667	0.850448	1.03133
NEK1	4	3	0	0	3	4	0.117667	0.850448	-0.96441
NKX3-2	4	3	1	1	1	0	0.117667	0.850448	0.693147
OGG1	4	3	0	2	1	2	0.117667	0.850448	-1.04811
PDP2	4	3	0	0	3	0	0.117667	0.850448	2.77259
PLA2G1B	4	3	1	0	2	0	0.117667	0.850448	1.74126
PLEKHG2	4	3	1	1	1	1	0.117667	0.850448	0
PNPLA7	4	3	1	2	0	0	0.117667	0.850448	0
PRCP	4	3	0	0	3	1	0.117667	0.850448	2.07944
RAB11FIP3	4	3	0	0	3	0	0.117667	0.850448	2.77259
RAMP2	4	3	1	0	2	1	0.117667	0.850448	1.04811
RFXAP	4	3	1	1	1	0	0.117667	0.850448	0.693147
SEPT8	4	3	0	0	3	1	0.117667	0.850448	2.07944
SHISA2	4	3	0	0	3	1	0.117667	0.850448	2.07944
SNHG9	4	3	2	1	0	1	0.117667	0.850448	-0.693147
ST6GALNAC4	4	3	0	0	3	1	0.117667	0.850448	2.07944
TBP	4	3	1	0	2	0	0.117667	0.850448	1.74126
TBX3	4	3	0	2	1	1	0.117667	0.850448	0
TCEB3	4	3	0	0	3	5	0.117667	0.850448	-1.85904
TENC1	4	3	0	1	2	1	0.117667	0.850448	1.04811
THYN1	4	3	1	1	1	0	0.117667	0.850448	0.693147
TMEM8A	4	3	2	0	1	2	0.117667	0.850448	-1.04811
TRAPPC6B	4	3	0	1	2	2	0.117667	0.850448	0
TRMT12	4	3	0	3	0	0	0.117667	0.850448	0
U2AF1L4	4	3	0	2	1	1	0.117667	0.850448	0
ZC3H7A	4	3	1	1	1	1	0.117667	0.850448	0
ZNF215	4	3	1	1	1	1	0.117667	0.850448	0
ZNF389	4	3	0	0	3	0	0.117667	0.850448	2.77259
ASPM	27	10	2	4	4	1	0.119803	0.850448	3.04385
MAT2B	27	10	0	0	10	8	0.119803	0.850448	1.33032
PRRT2	27	10	4	5	1	1	0.119803	0.850448	0
SNX3	27	10	0	0	10	3	0.119803	0.850448	5.52277
BCL2L12	10	5	2	2	1	4	0.119877	0.850448	-3.04385
BCS1L	10	5	1	1	3	2	0.119877	0.850448	1.03133
CPNE7	10	5	1	1	3	5	0.119877	0.850448	-1.85904
ETNK1	10	5	0	0	5	1	0.119877	0.850448	3.93848
FASTK	10	5	0	0	5	1	0.119877	0.850448	3.93848
HOXA7	10	5	1	2	2	2	0.119877	0.850448	0
MEGF8	10	5	1	2	2	4	0.119877	0.850448	-1.99574
MKRN1	10	5	0	0	5	1	0.119877	0.850448	3.93848
MUTYH	10	5	0	0	5	2	0.119877	0.850448	2.89037
NRXN2	10	5	1	0	4	0	0.119877	0.850448	3.737
PRSS36	10	5	0	3	2	2	0.119877	0.850448	0
RGS20	10	5	0	0	5	2	0.119877	0.850448	2.89037
SFRS14	10	5	0	1	4	0	0.119877	0.850448	3.737
SIGMAR1	10	5	0	4	1	1	0.119877	0.850448	0
STAMBP	10	5	1	3	1	0	0.119877	0.850448	0.693147
TRIM8	10	5	2	2	1	2	0.119877	0.850448	-1.04811
ZDHHC1	10	5	1	0	4	1	0.119877	0.850448	3.04385
CHST7	20	8	1	1	6	2	0.120392	0.850448	3.7216
LOC100128191	20	8	3	5	0	0	0.120392	0.850448	0
MRPL34	20	8	4	4	0	0	0.120392	0.850448	0
RGMA	20	8	2	0	6	6	0.120392	0.850448	0
RPN2	20	8	0	0	8	6	0.120392	0.850448	1.50218
SMAD7	20	8	2	0	6	11	0.120392	0.850448	-3.44544
TOB2	20	8	1	2	5	7	0.120392	0.850448	-1.60669
IPO5	38	13	0	0	13	9	0.12128	0.850448	2.39881
ABCA12	7	4	0	1	3	4	0.122558	0.850448	-0.96441
ADAT1	7	4	0	0	4	0	0.122558	0.850448	3.737
ARMC7	7	4	1	1	2	1	0.122558	0.850448	1.04811
BAX	7	4	1	1	2	2	0.122558	0.850448	0
BCDIN3D	7	4	0	1	3	3	0.122558	0.850448	0
C17orf59	7	4	0	4	0	0	0.122558	0.850448	0
C3orf1	7	4	2	0	2	0	0.122558	0.850448	1.74126
CES2	7	4	1	3	0	1	0.122558	0.850448	-0.693147
CHMP4A	7	4	3	1	0	0	0.122558	0.850448	0
CIB2	7	4	1	0	3	3	0.122558	0.850448	0
CNOT6	7	4	1	1	2	1	0.122558	0.850448	1.04811
DUSP2	7	4	1	1	2	1	0.122558	0.850448	1.04811
FUZ	7	4	1	3	0	1	0.122558	0.850448	-0.693147
GPR162	7	4	1	3	0	1	0.122558	0.850448	-0.693147
GRRP1	7	4	3	1	0	1	0.122558	0.850448	-0.693147
HSPA4	7	4	0	1	3	4	0.122558	0.850448	-0.96441
KCTD2	7	4	1	1	2	0	0.122558	0.850448	1.74126
KDM4A	7	4	1	0	3	1	0.122558	0.850448	2.07944
LAMB2	7	4	2	1	1	0	0.122558	0.850448	0.693147
LMBRD2	7	4	2	0	2	0	0.122558	0.850448	1.74126
LOC400657	7	4	1	3	0	0	0.122558	0.850448	0
LOC644538	7	4	1	3	0	0	0.122558	0.850448	0
LRRK2	7	4	0	2	2	3	0.122558	0.850448	-1.03133
LSM1	7	4	0	0	4	1	0.122558	0.850448	3.04385
MYEF2	7	4	2	0	2	0	0.122558	0.850448	1.74126
NTNG1	7	4	0	0	4	2	0.122558	0.850448	1.99574
PAFAH1B3	7	4	0	1	3	2	0.122558	0.850448	1.03133
PCBP1	7	4	3	1	0	0	0.122558	0.850448	0
PHC2	7	4	0	0	4	2	0.122558	0.850448	1.99574
PLEKHA4	7	4	1	1	2	0	0.122558	0.850448	1.74126
PNPLA6	7	4	0	1	3	1	0.122558	0.850448	2.07944
QRICH1	7	4	1	0	3	3	0.122558	0.850448	0
SEC24A	7	4	1	2	1	1	0.122558	0.850448	0
SERAC1	7	4	0	0	4	1	0.122558	0.850448	3.04385
SFRS3	7	4	0	0	4	3	0.122558	0.850448	0.96441
SGTA	7	4	0	0	4	3	0.122558	0.850448	0.96441
SHROOM2	7	4	0	0	4	3	0.122558	0.850448	0.96441
SIRT5	7	4	2	1	1	1	0.122558	0.850448	0
SIX3	7	4	1	3	0	2	0.122558	0.850448	-1.74126
SPPL2B	7	4	0	1	3	6	0.122558	0.850448	-2.69027
ST7OT1	7	4	3	1	0	0	0.122558	0.850448	0
VSIG10	7	4	1	0	3	2	0.122558	0.850448	1.03133
ZNF323	7	4	0	1	3	2	0.122558	0.850448	1.03133
IGDCC4	57	18	0	0	18	14	0.123606	0.850448	1.92771
CA11	31	11	4	6	1	3	0.126418	0.850448	-2.07944
C9orf23	17	7	1	1	5	2	0.129769	0.850448	2.89037
CCDC111	17	7	0	1	6	4	0.129769	0.850448	1.72586
CRLF3	17	7	0	0	7	0	0.129769	0.850448	6.23832
FHAD1	17	7	0	0	7	2	0.129769	0.850448	4.49707
GOSR1	17	7	0	0	7	5	0.129769	0.850448	1.60669
JAG2	17	7	0	1	6	4	0.129769	0.850448	1.72586
KIAA0226	17	7	1	0	6	2	0.129769	0.850448	3.7216
LOC100289511	17	7	2	5	0	0	0.129769	0.850448	0
PPTC7	17	7	2	0	5	3	0.129769	0.850448	1.85904
RHOBTB1	17	7	0	0	7	5	0.129769	0.850448	1.60669
SEMA4C	17	7	0	1	6	4	0.129769	0.850448	1.72586
TGFBR2	17	7	1	1	5	1	0.129769	0.850448	3.93848
ZNF436	17	7	3	2	2	6	0.129769	0.850448	-3.7216
KCNMB2	24	9	1	1	7	7	0.12997	0.850448	0
LSM14A	24	9	2	0	7	5	0.12997	0.850448	1.60669
VGLL4	50	16	2	4	10	13	0.13152	0.850448	-1.75247
GPC6	129	36	2	0	34	13	0.131715	0.850448	8.18856
PIK3R3	35	12	3	2	7	3	0.131795	0.850448	3.46574
RHBDD3	35	12	2	2	8	5	0.131795	0.850448	2.33341
PITPNC1	101	29	0	0	29	20	0.132909	0.850448	3.31679
CBFA2T2	39	13	1	0	12	8	0.136187	0.850448	2.5264
LETMD1	39	13	2	2	9	2	0.136187	0.850448	5.90776
MFNG	39	13	2	0	11	13	0.136187	0.850448	-1.13953
TEKT5	39	13	0	0	13	6	0.136187	0.850448	4.58497
ITPR2	150	41	1	1	39	31	0.137129	0.850448	2.30327
PLA2G6	28	10	1	0	9	8	0.137494	0.850448	0.683985
SOX5	283	73	0	1	72	41	0.139235	0.850448	6.40249
ANKRD33B	14	6	0	0	6	1	0.139612	0.850448	4.76971
BDH1	14	6	2	1	3	5	0.139612	0.850448	-1.85904
DDX3X	14	6	2	3	1	2	0.139612	0.850448	-1.04811
G6PC3	14	6	1	0	5	3	0.139612	0.850448	1.85904
HOXB4	14	6	2	2	2	4	0.139612	0.850448	-1.99574
IGFBP5	14	6	1	1	4	2	0.139612	0.850448	1.99574
MAN2C1	14	6	1	0	5	0	0.139612	0.850448	4.63163
MDH2	14	6	0	0	6	6	0.139612	0.850448	0
MLST8	14	6	2	0	4	2	0.139612	0.850448	1.99574
SPATA12	14	6	1	0	5	0	0.139612	0.850448	4.63163
TATDN2	14	6	2	1	3	1	0.139612	0.850448	2.07944
UBIAD1	14	6	0	5	1	0	0.139612	0.850448	0.693147
C11orf80	43	14	0	1	13	10	0.139784	0.850448	1.75247
EXOC6B	43	14	0	0	14	4	0.139784	0.850448	6.84306
ANKFY1	21	8	1	2	5	5	0.141162	0.850448	0
KIF13A	21	8	0	0	8	5	0.141162	0.850448	2.33341
MYOZ3	21	8	1	1	6	4	0.141162	0.850448	1.72586
NRN1	21	8	4	2	2	1	0.141162	0.850448	1.04811
ZNF236	21	8	1	3	4	1	0.141162	0.850448	3.04385
CDK19	86	25	5	8	12	12	0.142168	0.850448	0
ABR	106	30	3	0	27	14	0.142261	0.850448	5.43903
CDC42EP1	47	15	0	0	15	16	0.142732	0.850448	-0.490299
MIER1	47	15	1	0	14	6	0.142732	0.850448	5.1172
C16orf86	32	11	1	3	7	5	0.143463	0.850448	1.60669
PPP1R9A	32	11	1	2	8	6	0.143463	0.850448	1.50218
YARS	32	11	4	2	5	6	0.143463	0.850448	-0.831229
TXNDC15	36	12	3	1	8	3	0.14823	0.850448	4.19245
ADAMTSL1	201	53	0	0	53	32	0.14867	0.850448	5.31839
AKNAD1	11	5	0	0	5	2	0.149556	0.850448	2.89037
ALKBH5	11	5	1	3	1	1	0.149556	0.850448	0
ANGEL2	11	5	1	1	3	4	0.149556	0.850448	-0.96441
BRI3BP	11	5	0	0	5	3	0.149556	0.850448	1.85904
C16orf7	11	5	2	0	3	2	0.149556	0.850448	1.03133
C19orf43	11	5	0	0	5	5	0.149556	0.850448	0
CFL2	11	5	2	1	2	2	0.149556	0.850448	0
CTBP1	11	5	0	0	5	3	0.149556	0.850448	1.85904
EEF1B2	11	5	0	1	4	2	0.149556	0.850448	1.99574
FAM57A	11	5	0	0	5	6	0.149556	0.850448	-0.831229
FSCN1	11	5	0	0	5	3	0.149556	0.850448	1.85904
HDX	11	5	1	2	2	1	0.149556	0.850448	1.04811
KLF16	11	5	2	0	3	2	0.149556	0.850448	1.03133
LOC63930	11	5	0	0	5	1	0.149556	0.850448	3.93848
MTX1	11	5	0	2	3	7	0.149556	0.850448	-3.46574
SDCCAG3	11	5	0	0	5	1	0.149556	0.850448	3.93848
SFMBT1	11	5	0	0	5	4	0.149556	0.850448	0.894632
SLC35C1	11	5	1	2	2	2	0.149556	0.850448	0
TCEA2	11	5	1	1	3	1	0.149556	0.850448	2.07944
THBS4	11	5	0	0	5	1	0.149556	0.850448	3.93848
YWHAQ	11	5	0	0	5	4	0.149556	0.850448	0.894632
ZMYM6	11	5	1	0	4	3	0.149556	0.850448	0.96441
ZNFX1	11	5	0	0	5	3	0.149556	0.850448	1.85904
ERMN	25	9	0	2	7	1	0.149809	0.850448	5.54518
SERTAD2	25	9	0	0	9	3	0.149809	0.850448	4.87643
ZNF668	25	9	5	4	0	7	0.149809	0.850448	-6.23832
USP34	71	21	1	0	20	15	0.151708	0.850448	2.28215
DCAKD	107	30	0	0	30	26	0.151961	0.850448	1.34131
DBP	40	13	1	1	11	20	0.15205	0.850448	-4.46421
ACAD9	2	2	0	1	1	3	0.153014	0.850448	-2.07944
ADAMTSL4	2	2	0	2	0	0	0.153014	0.850448	0
ANAPC16	2	2	0	0	2	1	0.153014	0.850448	1.04811
ARFIP2	2	2	0	1	1	0	0.153014	0.850448	0.693147
ARGLU1	2	2	1	0	1	0	0.153014	0.850448	0.693147
ATP6V1G1	2	2	0	0	2	1	0.153014	0.850448	1.04811
ATP8B3	2	2	0	1	1	2	0.153014	0.850448	-1.04811
BAK1	2	2	0	0	2	0	0.153014	0.850448	1.74126
BCKDK	2	2	1	1	0	0	0.153014	0.850448	0
BICD2	2	2	0	0	2	0	0.153014	0.850448	1.74126
C13orf27	2	2	0	0	2	0	0.153014	0.850448	1.74126
C19orf42	2	2	0	0	2	0	0.153014	0.850448	1.74126
C1orf123	2	2	1	0	1	4	0.153014	0.850448	-3.04385
C1orf91	2	2	0	0	2	5	0.153014	0.850448	-2.89037
C2orf24	2	2	1	0	1	1	0.153014	0.850448	0
C8orf41	2	2	1	1	0	2	0.153014	0.850448	-1.74126
CA14	2	2	0	0	2	0	0.153014	0.850448	1.74126
CCDC157	2	2	0	1	1	0	0.153014	0.850448	0.693147
CCNB1	2	2	0	0	2	0	0.153014	0.850448	1.74126
CDX2	2	2	2	0	0	0	0.153014	0.850448	0
CECR4	2	2	0	0	2	0	0.153014	0.850448	1.74126
CEP97	2	2	0	0	2	0	0.153014	0.850448	1.74126
CHRNA6	2	2	1	1	0	0	0.153014	0.850448	0
CLTB	2	2	0	1	1	0	0.153014	0.850448	0.693147
CPT1C	2	2	0	1	1	0	0.153014	0.850448	0.693147
CRYZ	2	2	0	2	0	0	0.153014	0.850448	0
CTSB	2	2	0	0	2	0	0.153014	0.850448	1.74126
CYBA	2	2	0	0	2	2	0.153014	0.850448	0
CYP2S1	2	2	0	0	2	1	0.153014	0.850448	1.04811
DDX19B	2	2	0	0	2	1	0.153014	0.850448	1.04811
DYRK4	2	2	0	0	2	0	0.153014	0.850448	1.74126
ECM2	2	2	0	0	2	1	0.153014	0.850448	1.04811
EPB41L4A	2	2	0	0	2	0	0.153014	0.850448	1.74126
ERH	2	2	0	0	2	1	0.153014	0.850448	1.04811
ERMP1	2	2	0	0	2	1	0.153014	0.850448	1.04811
FAM149A	2	2	0	0	2	1	0.153014	0.850448	1.04811
FJX1	2	2	1	1	0	0	0.153014	0.850448	0
FLYWCH1	2	2	0	0	2	2	0.153014	0.850448	0
FNDC5	2	2	0	0	2	0	0.153014	0.850448	1.74126
FOXD3	2	2	1	1	0	0	0.153014	0.850448	0
FRS2	2	2	1	0	1	0	0.153014	0.850448	0.693147
GAK	2	2	0	0	2	1	0.153014	0.850448	1.04811
GALNT11	2	2	0	0	2	2	0.153014	0.850448	0
GPR137	2	2	0	2	0	1	0.153014	0.850448	-0.693147
HAS3	2	2	0	0	2	0	0.153014	0.850448	1.74126
HIF1A	2	2	0	0	2	1	0.153014	0.850448	1.04811
HMOX1	2	2	0	0	2	0	0.153014	0.850448	1.74126
HORMAD1	2	2	1	1	0	0	0.153014	0.850448	0
IVNS1ABP	2	2	0	0	2	0	0.153014	0.850448	1.74126
JUND	2	2	1	1	0	0	0.153014	0.850448	0
KAT5	2	2	1	1	0	0	0.153014	0.850448	0
KBTBD7	2	2	2	0	0	0	0.153014	0.850448	0
KIAA1147	2	2	0	0	2	0	0.153014	0.850448	1.74126
KRBA1	2	2	1	0	1	1	0.153014	0.850448	0
KRTCAP2	2	2	1	0	1	1	0.153014	0.850448	0
LAMA4	2	2	1	0	1	0	0.153014	0.850448	0.693147
LANCL1	2	2	0	0	2	1	0.153014	0.850448	1.04811
LARP6	2	2	0	0	2	0	0.153014	0.850448	1.74126
LHFPL3	2	2	0	0	2	0	0.153014	0.850448	1.74126
LOC100144603	2	2	0	1	1	0	0.153014	0.850448	0.693147
LOC100190938	2	2	1	1	0	0	0.153014	0.850448	0
LOC441204	2	2	0	0	2	0	0.153014	0.850448	1.74126
LOC729991	2	2	1	0	1	0	0.153014	0.850448	0.693147
LOC729991-MEF2B	2	2	1	0	1	0	0.153014	0.850448	0.693147
LOC81691	2	2	0	0	2	2	0.153014	0.850448	0
LOX	2	2	1	1	0	0	0.153014	0.850448	0
LXN	2	2	0	1	1	0	0.153014	0.850448	0.693147
MAP2K2	2	2	0	0	2	3	0.153014	0.850448	-1.03133
MAP3K11	2	2	0	1	1	1	0.153014	0.850448	0
MAP3K2	2	2	2	0	0	0	0.153014	0.850448	0
MAPK11	2	2	0	2	0	0	0.153014	0.850448	0
MBD1	2	2	0	0	2	1	0.153014	0.850448	1.04811
MED16	2	2	0	0	2	0	0.153014	0.850448	1.74126
MGAT5B	2	2	1	0	1	2	0.153014	0.850448	-1.04811
MGC87042	2	2	0	0	2	1	0.153014	0.850448	1.04811
MPHOSPH8	2	2	0	0	2	0	0.153014	0.850448	1.74126
MTCH1	2	2	0	0	2	2	0.153014	0.850448	0
MTRR	2	2	0	0	2	0	0.153014	0.850448	1.74126
NAT8L	2	2	0	0	2	0	0.153014	0.850448	1.74126
NCRNA00029	2	2	1	1	0	0	0.153014	0.850448	0
NEDD1	2	2	1	1	0	3	0.153014	0.850448	-2.77259
NKX6-1	2	2	0	1	1	2	0.153014	0.850448	-1.04811
NUP43	2	2	0	0	2	2	0.153014	0.850448	0
OBSCN	2	2	1	1	0	0	0.153014	0.850448	0
ORC6L	2	2	0	0	2	1	0.153014	0.850448	1.04811
OSTCL	2	2	0	0	2	0	0.153014	0.850448	1.74126
OTUD5	2	2	0	0	2	0	0.153014	0.850448	1.74126
PDGFRL	2	2	0	0	2	2	0.153014	0.850448	0
PEX7	2	2	0	0	2	0	0.153014	0.850448	1.74126
PITPNM2	2	2	0	1	1	0	0.153014	0.850448	0.693147
PKN1	2	2	0	0	2	5	0.153014	0.850448	-2.89037
PMM1	2	2	0	0	2	2	0.153014	0.850448	0
PPP1CA	2	2	1	0	1	0	0.153014	0.850448	0.693147
PRELID2	2	2	0	1	1	1	0.153014	0.850448	0
PRSS16	2	2	1	0	1	1	0.153014	0.850448	0
PSMB8	2	2	0	0	2	0	0.153014	0.850448	1.74126
RAB5A	2	2	0	0	2	0	0.153014	0.850448	1.74126
RALB	2	2	0	0	2	1	0.153014	0.850448	1.04811
RBM17	2	2	0	2	0	1	0.153014	0.850448	-0.693147
RGS19	2	2	1	0	1	2	0.153014	0.850448	-1.04811
RNF113A	2	2	0	2	0	0	0.153014	0.850448	0
RPS9	2	2	0	0	2	2	0.153014	0.850448	0
RPUSD1	2	2	0	0	2	0	0.153014	0.850448	1.74126
RRP15	2	2	0	1	1	0	0.153014	0.850448	0.693147
SAC3D1	2	2	0	0	2	1	0.153014	0.850448	1.04811
SAMD3	2	2	0	0	2	0	0.153014	0.850448	1.74126
SCN2A	2	2	0	0	2	0	0.153014	0.850448	1.74126
SERPINB1	2	2	0	0	2	2	0.153014	0.850448	0
SERPINI1	2	2	0	0	2	0	0.153014	0.850448	1.74126
SIP1	2	2	0	0	2	1	0.153014	0.850448	1.04811
SLA2	2	2	1	0	1	0	0.153014	0.850448	0.693147
SLC35A2	2	2	0	1	1	1	0.153014	0.850448	0
SLC9A5	2	2	0	0	2	0	0.153014	0.850448	1.74126
SMOC1	2	2	0	0	2	0	0.153014	0.850448	1.74126
SNORD104	2	2	0	2	0	0	0.153014	0.850448	0
SNORD49A	2	2	1	1	0	0	0.153014	0.850448	0
SS18L2	2	2	0	0	2	1	0.153014	0.850448	1.04811
STARD4	2	2	0	0	2	0	0.153014	0.850448	1.74126
STRA13	2	2	0	0	2	2	0.153014	0.850448	0
SYT5	2	2	2	0	0	0	0.153014	0.850448	0
TCTN2	2	2	0	1	1	1	0.153014	0.850448	0
TM2D2	2	2	0	0	2	0	0.153014	0.850448	1.74126
TMEM141	2	2	1	1	0	0	0.153014	0.850448	0
TMEM173	2	2	2	0	0	0	0.153014	0.850448	0
TMEM20	2	2	0	0	2	0	0.153014	0.850448	1.74126
TMEM50A	2	2	0	0	2	1	0.153014	0.850448	1.04811
TMEM65	2	2	1	0	1	0	0.153014	0.850448	0.693147
TSPAN9	2	2	0	0	2	1	0.153014	0.850448	1.04811
TTC25	2	2	0	0	2	0	0.153014	0.850448	1.74126
TTC31	2	2	0	0	2	2	0.153014	0.850448	0
TUG1	2	2	2	0	0	0	0.153014	0.850448	0
UBE2Z	2	2	1	0	1	1	0.153014	0.850448	0
UPB1	2	2	0	0	2	1	0.153014	0.850448	1.04811
VWA3A	2	2	0	1	1	0	0.153014	0.850448	0.693147
ZC3H15	2	2	0	0	2	1	0.153014	0.850448	1.04811
ZFP1	2	2	0	0	2	0	0.153014	0.850448	1.74126
ZFYVE20	2	2	1	0	1	0	0.153014	0.850448	0.693147
ZMIZ2	2	2	0	0	2	0	0.153014	0.850448	1.74126
ZNF140	2	2	0	0	2	1	0.153014	0.850448	1.04811
ZNF181	2	2	1	1	0	0	0.153014	0.850448	0
ZNF480	2	2	0	0	2	1	0.153014	0.850448	1.04811
ZNF593	2	2	0	2	0	0	0.153014	0.850448	0
ZNF614	2	2	0	0	2	1	0.153014	0.850448	1.04811
ZNF84	2	2	0	0	2	0	0.153014	0.850448	1.74126
CDKN1B	18	7	2	1	4	1	0.153493	0.850448	3.04385
CLIP2	18	7	1	0	6	9	0.153493	0.850448	-2.18616
LMO7	18	7	1	0	6	6	0.153493	0.850448	0
MTFMT	18	7	0	0	7	7	0.153493	0.850448	0
POMGNT1	18	7	0	0	7	3	0.153493	0.850448	3.46574
PSMA4	18	7	0	0	7	3	0.153493	0.850448	3.46574
RPS19	18	7	0	1	6	3	0.153493	0.850448	2.69027
SLC22A11	18	7	0	0	7	4	0.153493	0.850448	2.50133
SLC2A11	18	7	1	0	6	3	0.153493	0.850448	2.69027
SLC37A3	18	7	0	0	7	2	0.153493	0.850448	4.49707
VPS45	18	7	2	2	3	0	0.153493	0.850448	2.77259
LOC344967	44	14	0	0	14	17	0.155113	0.850448	-1.47258
SLC38A5	48	15	0	0	15	14	0.157563	0.850448	0.510299
ZNF219	48	15	2	1	12	11	0.157563	0.850448	0.583143
ABHD15	8	4	2	2	0	1	0.158608	0.850448	-0.693147
ACVR2A	8	4	0	1	3	1	0.158608	0.850448	2.07944
ADAMTS9	8	4	0	1	3	1	0.158608	0.850448	2.07944
AKAP11	8	4	0	1	3	2	0.158608	0.850448	1.03133
ALDH16A1	8	4	0	0	4	5	0.158608	0.850448	-0.894632
ANKHD1	8	4	0	2	2	0	0.158608	0.850448	1.74126
ANKHD1-EIF4EBP3	8	4	0	2	2	0	0.158608	0.850448	1.74126
ATP6V0E1	8	4	0	0	4	1	0.158608	0.850448	3.04385
CACNB4	8	4	0	0	4	0	0.158608	0.850448	3.737
CSRNP3	8	4	0	0	4	1	0.158608	0.850448	3.04385
DCK	8	4	0	0	4	0	0.158608	0.850448	3.737
ELAVL1	8	4	0	1	3	3	0.158608	0.850448	0
FOSL1	8	4	0	0	4	5	0.158608	0.850448	-0.894632
FXR1	8	4	0	0	4	0	0.158608	0.850448	3.737
GK5	8	4	0	0	4	0	0.158608	0.850448	3.737
HNRNPH3	8	4	1	0	3	0	0.158608	0.850448	2.77259
ITGA2B	8	4	1	1	2	2	0.158608	0.850448	0
LPAR4	8	4	2	0	2	1	0.158608	0.850448	1.04811
MPV17	8	4	0	1	3	1	0.158608	0.850448	2.07944
MYO9B	8	4	0	0	4	1	0.158608	0.850448	3.04385
NRBP1	8	4	0	0	4	1	0.158608	0.850448	3.04385
OSM	8	4	2	2	0	0	0.158608	0.850448	0
PAK1	8	4	0	0	4	3	0.158608	0.850448	0.96441
PDCD2L	8	4	1	0	3	1	0.158608	0.850448	2.07944
PDPK1	8	4	1	3	0	0	0.158608	0.850448	0
PEX6	8	4	3	1	0	1	0.158608	0.850448	-0.693147
PRDXDD1P	8	4	2	2	0	0	0.158608	0.850448	0
PSMG3	8	4	3	1	0	0	0.158608	0.850448	0
RPH3AL	8	4	1	0	3	4	0.158608	0.850448	-0.96441
SMCR8	8	4	2	2	0	0	0.158608	0.850448	0
SYNCRIP	8	4	0	1	3	1	0.158608	0.850448	2.07944
TAF1	8	4	0	0	4	4	0.158608	0.850448	0
TBC1D13	8	4	0	0	4	0	0.158608	0.850448	3.737
TBC1D15	8	4	1	0	3	0	0.158608	0.850448	2.77259
TCF19	8	4	2	1	1	0	0.158608	0.850448	0.693147
TNRC6A	8	4	0	0	4	3	0.158608	0.850448	0.96441
WIPF3	8	4	0	0	4	0	0.158608	0.850448	3.737
ZADH2	8	4	0	0	4	2	0.158608	0.850448	1.99574
ZRANB1	8	4	1	0	3	0	0.158608	0.850448	2.77259
TSR1	52	16	6	6	4	1	0.159508	0.850448	3.04385
CAPZA1	33	11	2	6	3	7	0.161642	0.850448	-3.46574
HS6ST2	33	11	0	3	8	6	0.161642	0.850448	1.50218
TMEM189-UBE2V1	64	19	0	0	19	18	0.163096	0.850448	0.439576
BAD	22	8	0	0	8	3	0.163571	0.850448	4.19245
KIAA0391	22	8	2	1	5	1	0.163571	0.850448	3.93848
SSBP3	22	8	0	0	8	4	0.163571	0.850448	3.22804
TGIF2	22	8	0	0	8	8	0.163571	0.850448	0
TNKS	22	8	0	0	8	8	0.163571	0.850448	0
ABCA7	5	3	0	1	2	0	0.163771	0.850448	1.74126
ABTB2	5	3	0	0	3	0	0.163771	0.850448	2.77259
ANG	5	3	1	0	2	1	0.163771	0.850448	1.04811
AP1M2	5	3	0	2	1	0	0.163771	0.850448	0.693147
AP4B1	5	3	0	0	3	0	0.163771	0.850448	2.77259
ARHGAP26	5	3	0	0	3	2	0.163771	0.850448	1.03133
ASB6	5	3	0	1	2	0	0.163771	0.850448	1.74126
ATP5D	5	3	0	1	2	1	0.163771	0.850448	1.04811
BAIAP2L1	5	3	0	0	3	1	0.163771	0.850448	2.07944
BIN2	5	3	0	0	3	1	0.163771	0.850448	2.07944
BPNT1	5	3	0	0	3	0	0.163771	0.850448	2.77259
C16orf5	5	3	0	0	3	4	0.163771	0.850448	-0.96441
C2CD4C	5	3	1	2	0	0	0.163771	0.850448	0
C2orf62	5	3	0	1	2	1	0.163771	0.850448	1.04811
CACNA1A	5	3	1	1	1	0	0.163771	0.850448	0.693147
CBX4	5	3	0	0	3	2	0.163771	0.850448	1.03133
CCDC97	5	3	0	0	3	2	0.163771	0.850448	1.03133
CCNL1	5	3	1	1	1	1	0.163771	0.850448	0
CKAP4	5	3	0	0	3	1	0.163771	0.850448	2.07944
CLEC7A	5	3	1	0	2	1	0.163771	0.850448	1.04811
CLPTM1L	5	3	0	1	2	0	0.163771	0.850448	1.74126
COL8A1	5	3	0	0	3	0	0.163771	0.850448	2.77259
CORO7	5	3	0	0	3	1	0.163771	0.850448	2.07944
COX7A2L	5	3	0	1	2	0	0.163771	0.850448	1.74126
CRYBG3	5	3	0	0	3	3	0.163771	0.850448	0
DNAJB14	5	3	0	0	3	1	0.163771	0.850448	2.07944
EIF4H	5	3	0	0	3	1	0.163771	0.850448	2.07944
GFM1	5	3	0	0	3	2	0.163771	0.850448	1.03133
IL12A	5	3	1	0	2	3	0.163771	0.850448	-1.03133
IL4R	5	3	0	0	3	0	0.163771	0.850448	2.77259
IQCC	5	3	2	1	0	1	0.163771	0.850448	-0.693147
KANK3	5	3	2	1	0	0	0.163771	0.850448	0
KIAA0892	5	3	1	0	2	1	0.163771	0.850448	1.04811
KIAA1529	5	3	0	0	3	2	0.163771	0.850448	1.03133
LOC100130581	5	3	1	2	0	0	0.163771	0.850448	0
LOC283856	5	3	1	1	1	0	0.163771	0.850448	0.693147
LOC401588	5	3	0	0	3	1	0.163771	0.850448	2.07944
MAMDC2	5	3	0	1	2	1	0.163771	0.850448	1.04811
MRE11A	5	3	0	0	3	0	0.163771	0.850448	2.77259
NCRNA00245	5	3	0	1	2	1	0.163771	0.850448	1.04811
NFKB2	5	3	0	0	3	0	0.163771	0.850448	2.77259
NOXA1	5	3	0	1	2	1	0.163771	0.850448	1.04811
NPM3	5	3	1	0	2	2	0.163771	0.850448	0
OXSR1	5	3	0	0	3	0	0.163771	0.850448	2.77259
PAX8	5	3	0	0	3	2	0.163771	0.850448	1.03133
PCOLCE	5	3	0	1	2	1	0.163771	0.850448	1.04811
PDCD7	5	3	0	2	1	2	0.163771	0.850448	-1.04811
PDE3B	5	3	0	1	2	0	0.163771	0.850448	1.74126
PEX5	5	3	0	1	2	1	0.163771	0.850448	1.04811
PLEKHH3	5	3	2	1	0	0	0.163771	0.850448	0
PPARA	5	3	0	0	3	0	0.163771	0.850448	2.77259
PPWD1	5	3	0	0	3	1	0.163771	0.850448	2.07944
PRNP	5	3	0	1	2	1	0.163771	0.850448	1.04811
PUF60	5	3	0	0	3	0	0.163771	0.850448	2.77259
PUS10	5	3	0	0	3	1	0.163771	0.850448	2.07944
RALGAPB	5	3	0	0	3	1	0.163771	0.850448	2.07944
RNASE4	5	3	1	0	2	1	0.163771	0.850448	1.04811
RNF167	5	3	1	2	0	1	0.163771	0.850448	-0.693147
SEC61A1	5	3	0	0	3	2	0.163771	0.850448	1.03133
SFN	5	3	2	1	0	0	0.163771	0.850448	0
SLC9A3R1	5	3	0	1	2	1	0.163771	0.850448	1.04811
SMAD9	5	3	0	0	3	1	0.163771	0.850448	2.07944
STK19	5	3	0	1	2	3	0.163771	0.850448	-1.03133
SULT1A1	5	3	1	1	1	0	0.163771	0.850448	0.693147
SUPT7L	5	3	0	1	2	0	0.163771	0.850448	1.74126
SYT2	5	3	0	0	3	2	0.163771	0.850448	1.03133
TSPO	5	3	0	0	3	3	0.163771	0.850448	0
TTPA	5	3	0	1	2	1	0.163771	0.850448	1.04811
TXNDC11	5	3	0	0	3	3	0.163771	0.850448	0
UBTD1	5	3	0	0	3	1	0.163771	0.850448	2.07944
USP20	5	3	0	0	3	1	0.163771	0.850448	2.07944
ZGPAT	5	3	2	0	1	1	0.163771	0.850448	0
ZNF282	5	3	0	0	3	0	0.163771	0.850448	2.77259
ZNF598	5	3	0	0	3	1	0.163771	0.850448	2.07944
ZNF646	5	3	2	0	1	1	0.163771	0.850448	0
BRD2	92	26	4	4	18	22	0.163951	0.850448	-1.67584
SH3BP2	76	22	9	8	5	3	0.164386	0.850448	1.85904
KLHL15	37	12	1	0	11	5	0.165681	0.850448	4.27667
SLC38A9	37	12	5	4	3	3	0.165681	0.850448	0
ATP2B2	15	6	0	0	6	2	0.167072	0.850448	3.7216
COX5A	15	6	2	0	4	2	0.167072	0.850448	1.99574
EFR3A	15	6	0	0	6	3	0.167072	0.850448	2.69027
LZTR1	15	6	0	1	5	1	0.167072	0.850448	3.93848
METTL7A	15	6	2	2	2	2	0.167072	0.850448	0
NFKBIL1	15	6	1	2	3	2	0.167072	0.850448	1.03133
NFXL1	15	6	1	0	5	1	0.167072	0.850448	3.93848
PCNX	15	6	2	0	4	4	0.167072	0.850448	0
PHKA1	15	6	0	0	6	3	0.167072	0.850448	2.69027
STMN1	15	6	0	0	6	11	0.167072	0.850448	-3.44544
TIAM2	15	6	0	0	6	5	0.167072	0.850448	0.831229
LPIN2	41	13	2	8	3	6	0.168835	0.850448	-2.69027
NYX	41	13	7	5	1	0	0.168835	0.850448	0.693147
SPG20	41	13	1	1	11	9	0.168835	0.850448	1.25928
UBE4B	41	13	2	7	4	5	0.168835	0.850448	-0.894632
ACBD5	26	9	1	0	8	6	0.171044	0.850448	1.50218
CTTNBP2NL	26	9	0	0	9	3	0.171044	0.850448	4.87643
DLG1	26	9	1	0	8	3	0.171044	0.850448	4.19245
FBLN1	26	9	0	1	8	7	0.171044	0.850448	0.726712
FSTL3	26	9	4	3	2	1	0.171044	0.850448	1.04811
HNRNPR	26	9	1	0	8	7	0.171044	0.850448	0.726712
OGT	26	9	1	3	5	3	0.171044	0.850448	1.85904
PHF12	26	9	4	3	2	8	0.171044	0.850448	-5.22378
SNX25	26	9	0	0	9	3	0.171044	0.850448	4.87643
ZRANB3	26	9	0	0	9	5	0.171044	0.850448	3.01739
MYO18A	45	14	0	0	14	14	0.171286	0.850448	0
KLF7	53	16	1	1	14	7	0.174594	0.850448	4.34173
TCF7L2	61	18	0	9	9	14	0.176367	0.850448	-2.93103
C4orf45	30	10	0	0	10	6	0.176657	0.850448	2.83249
FAM192A	30	10	1	0	9	6	0.176657	0.850448	2.18616
PLD5	30	10	1	0	9	9	0.176657	0.850448	0
PPHLN1	30	10	1	0	9	8	0.176657	0.850448	0.683985
ZNF423	30	10	0	0	10	10	0.176657	0.850448	0
C1QBP	19	7	0	1	6	4	0.179045	0.850448	1.72586
COQ9	19	7	0	0	7	6	0.179045	0.850448	0.775464
HOXA10	19	7	5	0	2	2	0.179045	0.850448	0
MLKL	19	7	2	1	4	8	0.179045	0.850448	-3.22804
NEK8	19	7	3	1	3	0	0.179045	0.850448	2.77259
PPP1R12B	19	7	0	0	7	7	0.179045	0.850448	0
QSER1	19	7	0	0	7	5	0.179045	0.850448	1.60669
TARBP2	19	7	0	1	6	1	0.179045	0.850448	4.76971
C7orf50	34	11	0	0	11	8	0.180898	0.850448	1.94326
A2ML1	0	1	0	1	0	0	0.181456	0.850448	0
AAAS	0	1	0	1	0	0	0.181456	0.850448	0
ABLIM3	0	1	0	0	1	0	0.181456	0.850448	0.693147
ABO	0	1	0	0	1	0	0.181456	0.850448	0.693147
ACTL8	0	1	0	0	1	0	0.181456	0.850448	0.693147
ACTN3	0	1	1	0	0	1	0.181456	0.850448	-0.693147
ADAM29	0	1	0	0	1	0	0.181456	0.850448	0.693147
ADAM8	0	1	1	0	0	0	0.181456	0.850448	0
ADAMTS8	0	1	0	0	1	0	0.181456	0.850448	0.693147
ADCY4	0	1	0	0	1	0	0.181456	0.850448	0.693147
AIFM3	0	1	0	0	1	1	0.181456	0.850448	0
AKAP2	0	1	0	0	1	0	0.181456	0.850448	0.693147
AKAP3	0	1	0	0	1	0	0.181456	0.850448	0.693147
ALDH3B2	0	1	0	0	1	0	0.181456	0.850448	0.693147
ALS2CR8	0	1	0	0	1	0	0.181456	0.850448	0.693147
ANKRD22	0	1	1	0	0	0	0.181456	0.850448	0
ANKRD52	0	1	0	0	1	1	0.181456	0.850448	0
ANKRD58	0	1	1	0	0	0	0.181456	0.850448	0
ANKZF1	0	1	0	0	1	1	0.181456	0.850448	0
ARAP1	0	1	0	0	1	0	0.181456	0.850448	0.693147
ARID5A	0	1	0	0	1	1	0.181456	0.850448	0
ARMCX4	0	1	0	0	1	0	0.181456	0.850448	0.693147
ASPHD1	0	1	1	0	0	0	0.181456	0.850448	0
ASPHD2	0	1	0	0	1	0	0.181456	0.850448	0.693147
ATP13A4	0	1	0	1	0	0	0.181456	0.850448	0
ATP6V1G3	0	1	0	0	1	0	0.181456	0.850448	0.693147
ATXN8OS	0	1	0	0	1	0	0.181456	0.850448	0.693147
AVPI1	0	1	0	0	1	0	0.181456	0.850448	0.693147
BBS12	0	1	0	0	1	0	0.181456	0.850448	0.693147
BCAR4	0	1	0	0	1	1	0.181456	0.850448	0
BMP2	0	1	1	0	0	0	0.181456	0.850448	0
BTG1	0	1	0	1	0	0	0.181456	0.850448	0
C12orf44	0	1	0	1	0	0	0.181456	0.850448	0
C12orf59	0	1	0	1	0	0	0.181456	0.850448	0
C13orf26	0	1	0	0	1	0	0.181456	0.850448	0.693147
C13orf36	0	1	0	0	1	0	0.181456	0.850448	0.693147
C13orf37	0	1	0	0	1	1	0.181456	0.850448	0
C14orf165	0	1	0	0	1	1	0.181456	0.850448	0
C14orf166B	0	1	0	0	1	0	0.181456	0.850448	0.693147
C14orf167	0	1	1	0	0	0	0.181456	0.850448	0
C14orf21	0	1	0	0	1	0	0.181456	0.850448	0.693147
C14orf73	0	1	1	0	0	0	0.181456	0.850448	0
C14orf79	0	1	1	0	0	0	0.181456	0.850448	0
C15orf50	0	1	0	0	1	0	0.181456	0.850448	0.693147
C15orf55	0	1	0	0	1	0	0.181456	0.850448	0.693147
C17orf60	0	1	1	0	0	0	0.181456	0.850448	0
C17orf99	0	1	0	0	1	0	0.181456	0.850448	0.693147
C1orf172	0	1	0	0	1	0	0.181456	0.850448	0.693147
C1orf220	0	1	0	0	1	0	0.181456	0.850448	0.693147
C1orf52	0	1	0	1	0	0	0.181456	0.850448	0
C20orf173	0	1	0	0	1	0	0.181456	0.850448	0.693147
C20orf191	0	1	0	0	1	0	0.181456	0.850448	0.693147
C20orf202	0	1	0	0	1	0	0.181456	0.850448	0.693147
C21orf125	0	1	0	1	0	0	0.181456	0.850448	0
C22orf36	0	1	0	0	1	0	0.181456	0.850448	0.693147
C2CD4B	0	1	0	1	0	0	0.181456	0.850448	0
C2orf15	0	1	0	0	1	0	0.181456	0.850448	0.693147
C2orf29	0	1	1	0	0	1	0.181456	0.850448	-0.693147
C5orf4	0	1	0	0	1	0	0.181456	0.850448	0.693147
C6orf127	0	1	0	0	1	0	0.181456	0.850448	0.693147
C6orf176	0	1	0	0	1	0	0.181456	0.850448	0.693147
C6orf223	0	1	0	0	1	0	0.181456	0.850448	0.693147
C9orf116	0	1	0	0	1	1	0.181456	0.850448	0
C9orf4	0	1	0	0	1	0	0.181456	0.850448	0.693147
C9orf84	0	1	0	0	1	0	0.181456	0.850448	0.693147
CACNA1B	0	1	0	0	1	0	0.181456	0.850448	0.693147
CALCOCO2	0	1	0	0	1	0	0.181456	0.850448	0.693147
CAPN10	0	1	0	0	1	0	0.181456	0.850448	0.693147
CAPN6	0	1	0	0	1	0	0.181456	0.850448	0.693147
CCDC113	0	1	0	0	1	0	0.181456	0.850448	0.693147
CCDC144A	0	1	0	0	1	0	0.181456	0.850448	0.693147
CCDC42B	0	1	0	0	1	0	0.181456	0.850448	0.693147
CCDC90A	0	1	0	1	0	1	0.181456	0.850448	-0.693147
CCKBR	0	1	0	1	0	0	0.181456	0.850448	0
CD22	0	1	0	0	1	0	0.181456	0.850448	0.693147
CD46	0	1	0	0	1	0	0.181456	0.850448	0.693147
CDH20	0	1	0	0	1	0	0.181456	0.850448	0.693147
CEACAM20	0	1	0	0	1	1	0.181456	0.850448	0
CENPW	0	1	0	0	1	2	0.181456	0.850448	-1.04811
CGA	0	1	0	0	1	0	0.181456	0.850448	0.693147
CHIA	0	1	0	0	1	0	0.181456	0.850448	0.693147
CHRNA4	0	1	0	0	1	0	0.181456	0.850448	0.693147
CIB3	0	1	0	1	0	0	0.181456	0.850448	0
CLNK	0	1	0	0	1	0	0.181456	0.850448	0.693147
CMTM2	0	1	0	0	1	0	0.181456	0.850448	0.693147
CMTM6	0	1	0	0	1	0	0.181456	0.850448	0.693147
CNFN	0	1	0	0	1	0	0.181456	0.850448	0.693147
CNTFR	0	1	0	0	1	0	0.181456	0.850448	0.693147
COL6A6	0	1	0	0	1	0	0.181456	0.850448	0.693147
COL8A2	0	1	0	1	0	0	0.181456	0.850448	0
COX5B	0	1	0	0	1	0	0.181456	0.850448	0.693147
CR2	0	1	0	0	1	0	0.181456	0.850448	0.693147
CRHBP	0	1	1	0	0	0	0.181456	0.850448	0
CRHR1	0	1	0	0	1	0	0.181456	0.850448	0.693147
CRYBB1	0	1	0	0	1	0	0.181456	0.850448	0.693147
CSMD2	0	1	0	0	1	0	0.181456	0.850448	0.693147
CST8	0	1	0	0	1	0	0.181456	0.850448	0.693147
CTRC	0	1	0	0	1	0	0.181456	0.850448	0.693147
CTSL2	0	1	1	0	0	0	0.181456	0.850448	0
CYBB	0	1	0	0	1	0	0.181456	0.850448	0.693147
CYP27A1	0	1	0	1	0	0	0.181456	0.850448	0
CYP3A7	0	1	0	0	1	0	0.181456	0.850448	0.693147
CYP4F3	0	1	0	0	1	0	0.181456	0.850448	0.693147
CYTH4	0	1	0	0	1	0	0.181456	0.850448	0.693147
DDIT4	0	1	0	0	1	0	0.181456	0.850448	0.693147
DDIT4L	0	1	0	1	0	0	0.181456	0.850448	0
DGCR5	0	1	0	0	1	0	0.181456	0.850448	0.693147
DKFZp566F0947	0	1	1	0	0	0	0.181456	0.850448	0
DNAJC12	0	1	0	0	1	0	0.181456	0.850448	0.693147
DNHD1	0	1	0	0	1	0	0.181456	0.850448	0.693147
DNPEP	0	1	0	1	0	0	0.181456	0.850448	0
DRP2	0	1	0	1	0	0	0.181456	0.850448	0
DSG3	0	1	1	0	0	0	0.181456	0.850448	0
DTHD1	0	1	0	0	1	0	0.181456	0.850448	0.693147
DUSP13	0	1	0	1	0	0	0.181456	0.850448	0
ECHS1	0	1	0	0	1	0	0.181456	0.850448	0.693147
EDDM3B	0	1	0	0	1	0	0.181456	0.850448	0.693147
EFEMP2	0	1	1	0	0	0	0.181456	0.850448	0
EHD3	0	1	0	0	1	0	0.181456	0.850448	0.693147
ELF1	0	1	0	0	1	0	0.181456	0.850448	0.693147
ELOVL3	0	1	0	1	0	1	0.181456	0.850448	-0.693147
ELTD1	0	1	0	0	1	0	0.181456	0.850448	0.693147
EME2	0	1	0	0	1	0	0.181456	0.850448	0.693147
ENGASE	0	1	0	0	1	0	0.181456	0.850448	0.693147
EPPK1	0	1	1	0	0	0	0.181456	0.850448	0
ESYT1	0	1	0	1	0	1	0.181456	0.850448	-0.693147
EVPL	0	1	1	0	0	0	0.181456	0.850448	0
FADS3	0	1	0	0	1	0	0.181456	0.850448	0.693147
FAHD2A	0	1	0	1	0	0	0.181456	0.850448	0
FAM105A	0	1	0	0	1	0	0.181456	0.850448	0.693147
FAM127B	0	1	0	1	0	0	0.181456	0.850448	0
FAM167B	0	1	0	0	1	0	0.181456	0.850448	0.693147
FAM20C	0	1	0	0	1	1	0.181456	0.850448	0
FAM26F	0	1	0	1	0	0	0.181456	0.850448	0
FCN3	0	1	1	0	0	0	0.181456	0.850448	0
FERMT3	0	1	0	0	1	0	0.181456	0.850448	0.693147
FETUB	0	1	0	0	1	0	0.181456	0.850448	0.693147
FGF20	0	1	0	0	1	0	0.181456	0.850448	0.693147
FGF4	0	1	0	1	0	0	0.181456	0.850448	0
FH	0	1	0	0	1	0	0.181456	0.850448	0.693147
FOXN1	0	1	0	0	1	0	0.181456	0.850448	0.693147
FREM3	0	1	0	0	1	0	0.181456	0.850448	0.693147
GCM1	0	1	0	0	1	0	0.181456	0.850448	0.693147
GCNT7	0	1	0	1	0	0	0.181456	0.850448	0
GET4	0	1	0	0	1	0	0.181456	0.850448	0.693147
GIPC1	0	1	0	0	1	0	0.181456	0.850448	0.693147
GJC3	0	1	0	1	0	0	0.181456	0.850448	0
GJD3	0	1	1	0	0	0	0.181456	0.850448	0
GLIPR1L1	0	1	0	0	1	0	0.181456	0.850448	0.693147
GLRA2	0	1	1	0	0	0	0.181456	0.850448	0
GMFG	0	1	0	0	1	0	0.181456	0.850448	0.693147
GOLGA6L5	0	1	1	0	0	0	0.181456	0.850448	0
GP1BA	0	1	1	0	0	0	0.181456	0.850448	0
GPR153	0	1	0	0	1	0	0.181456	0.850448	0.693147
GPR85	0	1	1	0	0	0	0.181456	0.850448	0
GPR88	0	1	1	0	0	0	0.181456	0.850448	0
GRIK1	0	1	0	0	1	0	0.181456	0.850448	0.693147
GRK7	0	1	0	0	1	0	0.181456	0.850448	0.693147
GSC2	0	1	1	0	0	0	0.181456	0.850448	0
GSDMC	0	1	0	0	1	0	0.181456	0.850448	0.693147
GSPT2	0	1	0	1	0	0	0.181456	0.850448	0
GTSE1	0	1	0	0	1	0	0.181456	0.850448	0.693147
HCRTR1	0	1	0	0	1	0	0.181456	0.850448	0.693147
HEPHL1	0	1	0	1	0	0	0.181456	0.850448	0
HGFAC	0	1	0	1	0	0	0.181456	0.850448	0
HIST4H4	0	1	0	1	0	0	0.181456	0.850448	0
HMX2	0	1	0	0	1	0	0.181456	0.850448	0.693147
HNF4A	0	1	0	0	1	0	0.181456	0.850448	0.693147
HNRNPAB	0	1	0	1	0	0	0.181456	0.850448	0
HOXA2	0	1	1	0	0	0	0.181456	0.850448	0
HRH4	0	1	1	0	0	0	0.181456	0.850448	0
IFT20	0	1	0	0	1	0	0.181456	0.850448	0.693147
IGFBP3	0	1	0	0	1	0	0.181456	0.850448	0.693147
IL1RAP	0	1	0	0	1	0	0.181456	0.850448	0.693147
INSC	0	1	0	0	1	0	0.181456	0.850448	0.693147
IQGAP3	0	1	0	0	1	0	0.181456	0.850448	0.693147
IRAK4	0	1	0	0	1	0	0.181456	0.850448	0.693147
IRX4	0	1	1	0	0	0	0.181456	0.850448	0
ISG20L2	0	1	0	1	0	0	0.181456	0.850448	0
ITGA10	0	1	1	0	0	0	0.181456	0.850448	0
ITGA11	0	1	0	0	1	0	0.181456	0.850448	0.693147
ITGA3	0	1	1	0	0	0	0.181456	0.850448	0
IYD	0	1	0	1	0	0	0.181456	0.850448	0
JAKMIP1	0	1	0	0	1	0	0.181456	0.850448	0.693147
JSRP1	0	1	0	0	1	0	0.181456	0.850448	0.693147
JUN	0	1	0	1	0	0	0.181456	0.850448	0
KC6	0	1	0	0	1	0	0.181456	0.850448	0.693147
KCNH2	0	1	0	0	1	1	0.181456	0.850448	0
KCNH3	0	1	0	0	1	0	0.181456	0.850448	0.693147
KCNH6	0	1	0	0	1	0	0.181456	0.850448	0.693147
KCNK13	0	1	0	0	1	0	0.181456	0.850448	0.693147
KCNQ5	0	1	0	0	1	1	0.181456	0.850448	0
KIAA0141	0	1	0	1	0	1	0.181456	0.850448	-0.693147
KIAA1045	0	1	0	0	1	0	0.181456	0.850448	0.693147
KIAA1161	0	1	0	1	0	0	0.181456	0.850448	0
KIAA1257	0	1	0	1	0	0	0.181456	0.850448	0
KIAA1324L	0	1	0	0	1	0	0.181456	0.850448	0.693147
KIAA1683	0	1	0	0	1	1	0.181456	0.850448	0
KIAA1875	0	1	1	0	0	0	0.181456	0.850448	0
KIFC2	0	1	1	0	0	1	0.181456	0.850448	-0.693147
KLK10	0	1	1	0	0	0	0.181456	0.850448	0
KRT17	0	1	0	1	0	0	0.181456	0.850448	0
KRT18	0	1	0	0	1	0	0.181456	0.850448	0.693147
KRT78	0	1	1	0	0	0	0.181456	0.850448	0
L3MBTL4	0	1	0	0	1	0	0.181456	0.850448	0.693147
LBX2	0	1	0	0	1	0	0.181456	0.850448	0.693147
LDOC1	0	1	1	0	0	0	0.181456	0.850448	0
LGI4	0	1	0	0	1	0	0.181456	0.850448	0.693147
LLGL1	0	1	0	0	1	0	0.181456	0.850448	0.693147
LMOD1	0	1	0	0	1	1	0.181456	0.850448	0
LOC100128842	0	1	1	0	0	0	0.181456	0.850448	0
LOC100130238	0	1	0	1	0	0	0.181456	0.850448	0
LOC100133091	0	1	1	0	0	0	0.181456	0.850448	0
LOC143188	0	1	1	0	0	0	0.181456	0.850448	0
LOC150776	0	1	1	0	0	0	0.181456	0.850448	0
LOC157627	0	1	1	0	0	0	0.181456	0.850448	0
LOC222699	0	1	0	1	0	0	0.181456	0.850448	0
LOC285548	0	1	1	0	0	0	0.181456	0.850448	0
LOC285733	0	1	1	0	0	0	0.181456	0.850448	0
LOC360030	0	1	0	0	1	0	0.181456	0.850448	0.693147
LOC645638	0	1	0	0	1	0	0.181456	0.850448	0.693147
LOC647979	0	1	1	0	0	0	0.181456	0.850448	0
LOC90784	0	1	1	0	0	0	0.181456	0.850448	0
LRRC37B	0	1	0	1	0	0	0.181456	0.850448	0
LRRC46	0	1	0	1	0	0	0.181456	0.850448	0
LRRC4C	0	1	0	0	1	0	0.181456	0.850448	0.693147
MAG	0	1	0	0	1	0	0.181456	0.850448	0.693147
MAP3K10	0	1	0	0	1	0	0.181456	0.850448	0.693147
MARVELD3	0	1	0	0	1	0	0.181456	0.850448	0.693147
MEPE	0	1	0	0	1	0	0.181456	0.850448	0.693147
METTL7B	0	1	1	0	0	0	0.181456	0.850448	0
MFAP2	0	1	0	0	1	2	0.181456	0.850448	-1.04811
MFSD1	0	1	0	0	1	0	0.181456	0.850448	0.693147
MFSD2B	0	1	0	0	1	0	0.181456	0.850448	0.693147
MFSD4	0	1	0	0	1	0	0.181456	0.850448	0.693147
MGC4473	0	1	0	0	1	0	0.181456	0.850448	0.693147
MGC70857	0	1	0	1	0	0	0.181456	0.850448	0
MICB	0	1	0	0	1	1	0.181456	0.850448	0
MKNK1	0	1	1	0	0	0	0.181456	0.850448	0
MORC4	0	1	1	0	0	0	0.181456	0.850448	0
MPP4	0	1	0	0	1	0	0.181456	0.850448	0.693147
MSL3L2	0	1	0	0	1	0	0.181456	0.850448	0.693147
MTERF	0	1	0	0	1	0	0.181456	0.850448	0.693147
MUC20	0	1	0	1	0	0	0.181456	0.850448	0
MYCNOS	0	1	0	1	0	0	0.181456	0.850448	0
MYL2	0	1	0	0	1	0	0.181456	0.850448	0.693147
NAT1	0	1	0	0	1	0	0.181456	0.850448	0.693147
NCRNA00176	0	1	1	0	0	0	0.181456	0.850448	0
NDUFAF4	0	1	0	0	1	0	0.181456	0.850448	0.693147
NDUFB7	0	1	0	0	1	0	0.181456	0.850448	0.693147
NEUROD2	0	1	1	0	0	0	0.181456	0.850448	0
NLRC4	0	1	0	0	1	0	0.181456	0.850448	0.693147
NODAL	0	1	1	0	0	0	0.181456	0.850448	0
NOVA2	0	1	1	0	0	1	0.181456	0.850448	-0.693147
NTRK1	0	1	0	0	1	1	0.181456	0.850448	0
NUDT9P1	0	1	1	0	0	0	0.181456	0.850448	0
NUS1	0	1	0	0	1	0	0.181456	0.850448	0.693147
OGN	0	1	0	0	1	0	0.181456	0.850448	0.693147
OLFML2B	0	1	0	0	1	1	0.181456	0.850448	0
OR13J1	0	1	0	1	0	0	0.181456	0.850448	0
OR9G1	0	1	0	1	0	0	0.181456	0.850448	0
OR9G9	0	1	0	1	0	0	0.181456	0.850448	0
OTOP2	0	1	0	1	0	0	0.181456	0.850448	0
P2RX6P	0	1	0	0	1	0	0.181456	0.850448	0.693147
P2RY1	0	1	0	1	0	0	0.181456	0.850448	0
P2RY11	0	1	0	0	1	0	0.181456	0.850448	0.693147
PACRGL	0	1	0	0	1	0	0.181456	0.850448	0.693147
PAX7	0	1	0	0	1	0	0.181456	0.850448	0.693147
PCDH17	0	1	0	0	1	0	0.181456	0.850448	0.693147
PDCL2	0	1	0	0	1	1	0.181456	0.850448	0
PDCL3	0	1	0	0	1	0	0.181456	0.850448	0.693147
PDE1C	0	1	0	0	1	0	0.181456	0.850448	0.693147
PDGFA	0	1	0	0	1	0	0.181456	0.850448	0.693147
PDXDC2	0	1	0	0	1	0	0.181456	0.850448	0.693147
PEA15	0	1	0	0	1	0	0.181456	0.850448	0.693147
PGBD2	0	1	0	0	1	0	0.181456	0.850448	0.693147
PLBD1	0	1	0	0	1	0	0.181456	0.850448	0.693147
PLK2	0	1	1	0	0	0	0.181456	0.850448	0
PNOC	0	1	0	0	1	0	0.181456	0.850448	0.693147
POLR2G	0	1	1	0	0	0	0.181456	0.850448	0
POU3F3	0	1	0	1	0	0	0.181456	0.850448	0
PPIC	0	1	0	0	1	1	0.181456	0.850448	0
PPM1N	0	1	0	0	1	0	0.181456	0.850448	0.693147
PPP1R1A	0	1	0	0	1	0	0.181456	0.850448	0.693147
[truncated: 8,016 more rows]

## Sheet: RSPO3 screen in LGR4,5,6 KO
	Unsorted cells	Sorted cells					Derived from columns B and C		Derived from columns F and G
	All GT insertions in genes	Inactivating GT insertions in genes	Sense GT insetions in exons	Antisense GT insetions in exons	Sense GT insetions in introns	Antisense GT insetions in introns	p-value	FDR-corrected p-value	IGTIOB score
Total for dataset:	179474	63943	5222	5272	53449	52656
Gene
CNOT2	9	58	0	0	58	1	6.29891e-25	6.77447e-21	23.2936
LRP6	42	92	7	9	76	18	1.50589e-24	8.09794e-21	14.7139
BCL9	69	88	1	0	87	20	3.13048e-15	1.07946e-11	15.5485
SETD1B	20	50	7	15	28	16	4.01473e-15	1.07946e-11	4.7776
WDR20	137	123	0	3	120	72	3.06837e-13	6.60007e-10	6.62423
AXIN2	2	24	1	0	23	5	2.1261e-12	3.81103e-09	9.93963
CREBBP	28	50	1	0	49	5	2.82133e-12	4.33477e-09	17.4473
PIGP	26	45	12	7	26	5	6.01816e-11	8.09067e-08	11.0397
PIGS	13	32	1	2	29	1	4.2801e-10	5.11472e-07	15.9962
CNOT3	0	16	2	4	10	9	5.14938e-10	5.53815e-07	0.646333
GPC4	42	53	4	5	44	24	1.12057e-09	1.09561e-06	5.95763
DPM3	1	16	7	9	0	2	6.58922e-09	5.90559e-06	-1.74126
CTNNB1	4	19	1	5	13	2	2.62677e-08	2.17315e-05	8.30657
RNF146	3	16	0	0	16	1	2.13042e-07	0.000163662	10.8875
PIGU	17	28	0	0	28	9	4.34036e-07	0.000311203	8.70924
DOT1L	34	38	2	1	35	11	1.5711e-06	0.00105607	9.61823
PIGL	22	30	2	4	24	5	1.69141e-06	0.00107007	10.3164
MECOM	153	99	0	0	99	57	4.48442e-06	0.00267944	6.81009
KEAP1	35	36	2	0	34	13	9.70681e-06	0.00549456	8.18856
RHOA	31	33	13	2	18	2	1.42866e-05	0.00768261	10.7665
MALAT1	84	61	28	33	0	0	2.67923e-05	0.0137215	0
RTKN2	20	25	3	5	17	12	2.98762e-05	0.0146054	2.56119
PIGV	28	30	1	1	28	7	3.19752e-05	0.0149519	10.1199
FZD5	6	14	10	4	0	0	5.38574e-05	0.0241349	0
MIP	25	27	18	8	1	0	7.18223e-05	0.030898	0.693147
DPM1	0	7	2	1	4	0	8.63445e-05	0.0357168	3.737
TSC1	7	14	0	0	14	3	0.000122329	0.0487277	7.80747
CLEC12B	1	8	4	2	2	0	0.000156479	0.0601049	1.74126
OMG	115	72	32	31	9	6	0.000169791	0.0629692	2.18616
ZNF193	0	6	0	0	6	2	0.000328668	0.117828	3.7216
XPO6	106	66	0	1	65	45	0.000343441	0.119152	4.17619
NPRL3	24	24	3	1	20	4	0.000374273	0.125791	9.63551
LOC100128191	10	15	9	6	0	0	0.000386792	0.126059	0
TRIP12	13	17	1	1	15	7	0.000409425	0.129511	4.85203
CSDE1	5	11	1	1	9	2	0.000456403	0.140246	5.90776
ZNF688	30	27	6	6	15	10	0.000503085	0.150297	2.795
DEPDC5	20	21	1	2	18	10	0.000567444	0.164942	4.21241
DERL2	2	8	0	0	8	3	0.000600384	0.169924	4.19245
LOC100129387	22	22	8	14	0	0	0.00064885	0.178933	0
NCRNA00167	11	15	10	5	0	0	0.00069242	0.186174	0
CDK19	72	48	18	9	21	22	0.000719589	0.188761	-0.39931
ITPKC	7	12	2	3	7	3	0.00078988	0.197562	3.46574
RGS9BP	7	12	6	6	0	0	0.00078988	0.197562	0
BRD9	10	14	4	2	8	2	0.000898648	0.219658	5.22378
ZCCHC7	23	22	0	0	22	13	0.000956414	0.228583	4.13577
TFAP4	34	28	4	4	20	31	0.00102808	0.239777	-3.95617
ALG8	25	23	1	1	21	12	0.0010499	0.239777	4.29285
ERF	36	29	0	0	29	27	0.00107013	0.239777	0.670214
KIAA1841	9	13	0	1	12	2	0.00116388	0.251751	7.75018
MC1R	12	15	11	4	0	0	0.00118064	0.251751	0
RABIF	5	10	0	0	10	4	0.00121158	0.251751	4.55836
KSR1	56	39	0	1	38	16	0.00121721	0.251751	7.78274
TMC7	0	5	1	1	3	1	0.00125108	0.253875	2.07944
MTUS1	127	72	9	5	58	49	0.00132806	0.264506	1.9078
FLJ37453	67	44	17	17	10	7	0.00144737	0.279825	2.05703
E2F8	4	9	2	0	7	3	0.00145702	0.279825	3.46574
GTF2I	32	26	1	4	21	14	0.00174526	0.30491	3.20424
CH25H	1	6	4	2	0	0	0.00178261	0.30491	0
HIGD1A	1	6	0	0	6	3	0.00178261	0.30491	2.69027
LOC144486	2	7	4	3	0	0	0.00184618	0.30491	0
MFSD6	2	7	0	0	7	1	0.00184618	0.30491	5.54518
MPPE1	2	7	0	0	7	3	0.00184618	0.30491	3.46574
PIGX	2	7	0	0	7	3	0.00184618	0.30491	3.46574
TOR1A	2	7	2	3	2	0	0.00184618	0.30491	1.74126
C1orf213	64	42	20	22	0	0	0.00184656	0.30491	0
ERMN	13	15	3	1	11	4	0.00192823	0.30491	5.1713
FAM109B	13	15	10	5	0	0	0.00192823	0.30491	0
CHST14	7	11	7	4	0	0	0.00193276	0.30491	0
TAOK1	42	31	0	1	30	11	0.00195619	0.30491	8.10435
SEC14L2	26	22	10	12	0	2	0.00272705	0.418992	-1.74126
HDX	28	23	5	6	12	3	0.00285632	0.432672	6.71885
SPRYD4	14	15	7	4	4	7	0.00303059	0.452694	-2.50133
LOC644538	5	9	5	4	0	0	0.00312793	0.460834	0
BMF	106	60	14	13	33	26	0.00323444	0.470086	2.26889
FRAT2	11	13	3	10	0	0	0.00337829	0.484447	0
C10orf95	16	16	5	11	0	0	0.0034643	0.490245	0
SLC7A6	27	22	1	1	20	10	0.00373458	0.507116	5.07715
ANO3	18	17	0	0	17	8	0.00384728	0.507116	5.0876
HYAL1	18	17	7	10	0	0	0.00384728	0.507116	0
RP1-177G6.2	18	17	3	3	11	5	0.00384728	0.507116	4.27667
CACYBP	4	8	0	0	8	3	0.00390327	0.507116	4.19245
TM7SF2	4	8	4	3	1	1	0.00390327	0.507116	0
AGPS	160	83	20	18	45	31	0.0039501	0.507116	3.81906
LRRTM3	33	25	13	4	8	6	0.00404033	0.507116	1.50218
ZNF292	41	29	4	1	24	28	0.00414763	0.507116	-1.41026
IMP3	20	18	11	7	0	0	0.00417867	0.507116	0
SETD3	10	12	4	1	7	6	0.00448027	0.507116	0.775464
CCDC142	7	10	3	7	0	0	0.00459126	0.507116	0
JUNB	7	10	7	3	0	0	0.00459126	0.507116	0
LOC100132354	7	10	0	0	10	4	0.00459126	0.507116	4.55836
MBD6	7	10	1	1	8	0	0.00459126	0.507116	6.96504
TM9SF1	7	10	2	6	2	1	0.00459126	0.507116	1.04811
RSRC1	3	7	0	0	7	7	0.00475305	0.507116	0
ADCK2	0	4	1	2	1	0	0.00476232	0.507116	0.693147
CHRNA3	0	4	2	1	1	0	0.00476232	0.507116	0.693147
HECW2	0	4	0	0	4	1	0.00476232	0.507116	3.04385
MIR320C1	0	4	3	1	0	0	0.00476232	0.507116	0
PDIA3	0	4	0	0	4	0	0.00476232	0.507116	3.737
SEL1L	0	4	0	0	4	1	0.00476232	0.507116	3.04385
SMARCD1	0	4	0	2	2	2	0.00476232	0.507116	0
TM2D2	0	4	2	1	1	1	0.00476232	0.507116	0
EYS	93	53	0	0	53	41	0.00486615	0.513093	2.80145
MKX	69	42	15	12	15	12	0.00496989	0.518944	1.59891
ZEB2	48	32	2	1	29	20	0.00510557	0.527985	3.31679
RUNX1	32	24	1	1	22	12	0.00523099	0.535802	4.69216
LOC92249	19	17	0	0	17	12	0.00552477	0.551147	2.56119
CASC1	2	6	0	0	6	1	0.00553453	0.551147	4.76971
RNF125	2	6	1	1	4	0	0.00553453	0.551147	3.737
ATP8B5P	1	5	0	0	5	4	0.00586315	0.563019	0.894632
ELMOD3	1	5	1	3	1	2	0.00586315	0.563019	-1.04811
SGPP1	1	5	3	0	2	1	0.00586315	0.563019	1.04811
TRUB1	1	5	0	1	4	3	0.00586315	0.563019	0.96441
JMJD1C	14	14	4	2	8	4	0.00612419	0.581439	3.22804
HNRNPD	23	19	3	2	14	7	0.00616309	0.581439	4.34173
LRRC1	181	90	4	5	81	71	0.00666568	0.623386	1.62924
ACSS2	11	12	2	1	9	3	0.00714766	0.662699	4.87643
FOXK2	18	16	0	0	16	11	0.00731348	0.672277	2.67236
C12orf66	8	10	1	0	9	4	0.00791439	0.715288	3.91202
LOC153684	8	10	4	6	0	0	0.00791439	0.715288	0
CCAR1	22	18	3	2	13	9	0.00809657	0.719658	2.39881
CYTSB	22	18	0	0	18	15	0.00809657	0.719658	1.41741
CAB39L	13	13	0	0	13	8	0.00816695	0.719964	3.08279
NYX	34	24	15	7	2	1	0.00877594	0.767359	1.04811
GABARAP	15	14	2	1	11	4	0.00901155	0.7692	5.1713
LONRF2	15	14	3	10	1	1	0.00901155	0.7692	0
PRKCE	15	14	1	1	12	5	0.00901155	0.7692	4.85981
UBL3	10	11	0	2	9	9	0.00955689	0.804881	0
C11orf41	51	32	12	20	0	0	0.00957925	0.804881	0
ENO2	4	7	2	0	5	2	0.0101111	0.811526	2.89037
PCDH18	4	7	1	2	4	0	0.0101111	0.811526	3.737
SLC4A1AP	4	7	3	1	3	0	0.0101111	0.811526	2.77259
TNNI3	4	7	0	0	7	2	0.0101111	0.811526	4.49707
TUBB6	4	7	0	0	7	1	0.0101111	0.811526	5.54518
ZMYM2	4	7	0	0	7	2	0.0101111	0.811526	4.49707
ARHGEF6	71	41	4	1	36	18	0.0103491	0.824479	6.30315
FGD4	7	9	0	0	9	6	0.0105439	0.827736	2.18616
NCRNA00095	7	9	3	6	0	0	0.0105439	0.827736	0
C14orf159	21	17	4	6	7	9	0.0106428	0.829447	-1.4107
CXorf42	12	12	2	6	4	1	0.010917	0.844696	3.04385
WNK3	35	24	10	10	4	1	0.0111701	0.8581	3.04385
MLL	9	10	2	1	7	2	0.0128146	0.871863	4.49707
CNOT4	16	14	0	1	13	4	0.01287	0.871863	6.31083
LRRC31	16	14	6	4	4	3	0.01287	0.871863	0.96441
SOS2	16	14	4	4	6	8	0.01287	0.871863	-1.50218
FKBP3	3	6	0	0	6	1	0.0129112	0.871863	4.76971
LNP1	3	6	1	5	0	0	0.0129112	0.871863	0
LOC100128822	3	6	4	2	0	0	0.0129112	0.871863	0
MEN1	3	6	5	1	0	0	0.0129112	0.871863	0
NRBP2	3	6	3	1	2	1	0.0129112	0.871863	1.04811
PAM	3	6	1	0	5	2	0.0129112	0.871863	2.89037
SLC5A3	3	6	0	0	6	4	0.0129112	0.871863	1.72586
SRI	3	6	0	0	6	4	0.0129112	0.871863	1.72586
ATP5G2	44	28	2	6	20	11	0.0129523	0.871863	4.46421
DOCK3	142	71	4	5	62	39	0.0132188	0.871863	5.13272
ARRDC3	42	27	1	1	25	13	0.0132582	0.871863	5.26666
C16orf91	18	15	1	0	14	7	0.0135223	0.871863	4.34173
LOC100271722	20	16	1	2	13	6	0.0139985	0.871863	4.58497
IFT122	6	8	0	0	8	5	0.0140697	0.871863	2.33341
MFSD10	6	8	2	1	5	0	0.0140697	0.871863	4.63163
TMEM163	6	8	0	0	8	3	0.0140697	0.871863	4.19245
GSPT1	24	18	6	10	2	7	0.0145273	0.871863	-4.49707
LOC147727	30	21	13	8	0	0	0.0145701	0.871863	0
PDS5B	26	19	8	6	5	4	0.014624	0.871863	0.894632
CUX1	28	20	0	0	20	12	0.0146333	0.871863	3.88107
CAMTA2	11	11	6	3	2	2	0.0146335	0.871863	0
ZFHX4	11	11	1	0	10	5	0.0146335	0.871863	3.66372
STAG1	78	43	1	0	42	25	0.0153983	0.871863	5.09478
BTG2	13	12	6	4	2	3	0.0160477	0.871863	-1.03133
C14orf145	13	12	0	0	12	2	0.0160477	0.871863	7.75018
DHRS3	13	12	6	2	4	2	0.0160477	0.871863	1.99574
MFHAS1	13	12	1	0	11	8	0.0160477	0.871863	1.94326
C11orf52	2	5	2	2	1	1	0.0160645	0.871863	0
C9orf6	2	5	0	0	5	0	0.0160645	0.871863	4.63163
CRELD1	2	5	3	1	1	0	0.0160645	0.871863	0.693147
DVL3	2	5	0	1	4	3	0.0160645	0.871863	0.96441
MYB	2	5	0	0	5	0	0.0160645	0.871863	4.63163
SLC10A7	2	5	2	1	2	1	0.0160645	0.871863	1.04811
UGCG	2	5	0	0	5	2	0.0160645	0.871863	2.89037
PRC1	8	9	1	1	7	9	0.0172406	0.871863	-1.4107
SS18L1	8	9	2	6	1	0	0.0172406	0.871863	0.693147
ZFYVE9	8	9	0	0	9	7	0.0172406	0.871863	1.4107
C21orf34	275	124	1	1	122	110	0.0180753	0.871863	1.41015
ADAP1	0	3	0	0	3	1	0.0181283	0.871863	2.07944
ANKS4B	0	3	1	0	2	0	0.0181283	0.871863	1.74126
C17orf37	0	3	0	3	0	0	0.0181283	0.871863	0
C17orf82	0	3	2	1	0	0	0.0181283	0.871863	0
C20orf114	0	3	0	0	3	0	0.0181283	0.871863	2.77259
CCL18	0	3	0	0	3	1	0.0181283	0.871863	2.07944
CHMP5	0	3	0	0	3	0	0.0181283	0.871863	2.77259
CHRNB1	0	3	3	0	0	1	0.0181283	0.871863	-0.693147
DHRS4L1	0	3	0	3	0	1	0.0181283	0.871863	-0.693147
FGFR1OP	0	3	0	0	3	0	0.0181283	0.871863	2.77259
GMPPA	0	3	1	1	1	0	0.0181283	0.871863	0.693147
GNPTG	0	3	0	0	3	0	0.0181283	0.871863	2.77259
HCG27	0	3	0	1	2	1	0.0181283	0.871863	1.04811
ING5	0	3	1	0	2	0	0.0181283	0.871863	1.74126
LTC4S	0	3	1	1	1	0	0.0181283	0.871863	0.693147
MCAT	0	3	2	0	1	0	0.0181283	0.871863	0.693147
NAMPT	0	3	0	0	3	0	0.0181283	0.871863	2.77259
PLXDC1	0	3	0	1	2	2	0.0181283	0.871863	0
RAB14	0	3	0	1	2	2	0.0181283	0.871863	0
RASSF7	0	3	0	0	3	0	0.0181283	0.871863	2.77259
SBF1	0	3	1	0	2	2	0.0181283	0.871863	0
SNHG9	0	3	2	0	1	0	0.0181283	0.871863	0.693147
SPATA24	0	3	0	1	2	1	0.0181283	0.871863	1.04811
STAB1	0	3	2	1	0	0	0.0181283	0.871863	0
ZNF217	0	3	0	2	1	0	0.0181283	0.871863	0.693147
EPB41L4B	33	22	0	0	22	13	0.0182205	0.871863	4.13577
NDE1	48	29	5	5	19	14	0.0186256	0.871863	2.36728
ST7L	59	34	6	6	22	15	0.0186558	0.871863	3.09325
C12orf47	21	16	9	6	1	2	0.0187585	0.871863	-1.04811
ACSS1	5	7	3	1	3	2	0.018802	0.871863	1.03133
ACVR2A	5	7	0	0	7	2	0.018802	0.871863	4.49707
ANO10	5	7	0	0	7	8	0.018802	0.871863	-0.726712
CHMP7	5	7	0	2	5	1	0.018802	0.871863	3.93848
CRLF1	5	7	3	2	2	4	0.018802	0.871863	-1.99574
INPP5F	5	7	0	1	6	3	0.018802	0.871863	2.69027
PRDXDD1P	5	7	3	4	0	0	0.018802	0.871863	0
C17orf59	1	4	1	3	0	0	0.0188073	0.871863	0
C2orf65	1	4	0	0	4	1	0.0188073	0.871863	3.04385
CCPG1	1	4	1	0	3	1	0.0188073	0.871863	2.07944
CEBPD	1	4	2	2	0	0	0.0188073	0.871863	0
FLJ10038	1	4	2	2	0	0	0.0188073	0.871863	0
KATNAL2	1	4	0	0	4	2	0.0188073	0.871863	1.99574
LIMS1	1	4	0	0	4	2	0.0188073	0.871863	1.99574
PNLDC1	1	4	0	1	3	1	0.0188073	0.871863	2.07944
PNMAL1	1	4	3	1	0	0	0.0188073	0.871863	0
PRUNE	1	4	0	2	2	4	0.0188073	0.871863	-1.99574
SLC25A26	1	4	0	0	4	2	0.0188073	0.871863	1.99574
SUOX	1	4	2	0	2	0	0.0188073	0.871863	1.74126
VCPIP1	1	4	2	1	1	0	0.0188073	0.871863	0.693147
ZNF432	1	4	0	0	4	1	0.0188073	0.871863	3.04385
MYO19	23	17	7	5	5	7	0.0189296	0.873768	-1.60669
ELOVL6	57	33	1	0	32	16	0.01936	0.889815	6.05711
C16orf72	10	10	1	1	8	3	0.019679	0.900628	4.19245
C2orf3	12	11	1	1	9	4	0.0214956	0.971364	3.91202
DVL1	12	11	4	0	7	4	0.0214956	0.971364	2.50133
LOC100133985	12	11	3	2	6	7	0.0214956	0.971364	-0.775464
B3GNT1	14	12	4	7	1	2	0.0228026	0.995746	-1.04811
CCDC88A	14	12	1	1	10	6	0.0228026	0.995746	2.83249
FADS2	14	12	3	1	8	9	0.0228026	0.995746	-0.683985
HOXA11	14	12	1	3	8	5	0.0228026	0.995746	2.33341
KRT10	14	12	2	4	6	3	0.0228026	0.995746	2.69027
TLE3	14	12	4	0	8	5	0.0228026	0.995746	2.33341
C1GALT1C1	7	8	0	0	8	4	0.0232895	0.995746	3.22804
C9orf102	7	8	0	0	8	6	0.0232895	0.995746	1.50218
CHD1	7	8	0	0	8	2	0.0232895	0.995746	5.22378
FAM125A	7	8	1	1	6	0	0.0232895	0.995746	5.46286
FXR2	7	8	0	0	8	4	0.0232895	0.995746	3.22804
MAFG	7	8	0	1	7	0	0.0232895	0.995746	6.23832
TXLNG	16	13	3	3	7	4	0.0236984	0.995746	2.50133
MED15	45	27	0	0	27	16	0.0239598	0.995746	4.43844
CCDC91	150	72	0	0	72	71	0.0240115	0.995746	0.170482
COL24A1	26	18	2	3	13	7	0.0243813	0.995746	3.8095
RUNX2	26	18	0	0	18	15	0.0243813	0.995746	1.41741
APOOL	20	15	2	4	9	6	0.0245676	0.995746	2.18616
LCORL	24	17	0	0	17	3	0.0245871	0.995746	9.28004
XPR1	24	17	0	0	17	13	0.0245871	0.995746	2.00481
ACAP3	4	6	0	0	6	5	0.0251485	0.995746	0.831229
APOF	4	6	5	1	0	0	0.0251485	0.995746	0
CDS1	4	6	0	0	6	3	0.0251485	0.995746	2.69027
GPD1	4	6	2	4	0	0	0.0251485	0.995746	0
MEGF8	4	6	0	3	3	2	0.0251485	0.995746	1.03133
NDUFB6	4	6	1	3	2	0	0.0251485	0.995746	1.74126
NEK10	4	6	0	0	6	6	0.0251485	0.995746	0
NFATC1	4	6	1	0	5	7	0.0251485	0.995746	-1.60669
PCGF1	4	6	2	3	1	1	0.0251485	0.995746	0
PIGM	4	6	4	2	0	0	0.0251485	0.995746	0
PRSS27	4	6	2	3	1	1	0.0251485	0.995746	0
SIX3	4	6	3	2	1	2	0.0251485	0.995746	-1.04811
SSR3	4	6	1	1	4	1	0.0251485	0.995746	3.04385
MACROD2	61	34	0	0	34	22	0.0258081	0.995746	4.05278
MLL5	39	24	1	0	23	10	0.0264126	0.995746	6.2759
ATF3	9	9	0	0	9	1	0.0265669	0.995746	6.95587
COBL	9	9	0	0	9	8	0.0265669	0.995746	0.683985
METTL12	9	9	4	5	0	2	0.0265669	0.995746	-1.74126
NFXL1	9	9	1	1	7	7	0.0265669	0.995746	0
TPI1P2	9	9	5	4	0	0	0.0265669	0.995746	0
BMPR2	35	22	5	3	14	12	0.0280297	0.995746	1.08862
PARK2	221	100	0	0	100	75	0.0287856	0.995746	3.67034
DKFZP686I15217	33	21	12	9	0	0	0.0288099	0.995746	0
BTK	11	10	5	0	5	1	0.0288809	0.995746	3.93848
INPP4A	11	10	0	0	10	2	0.0288809	0.995746	6.5541
KLF5	11	10	0	0	10	6	0.0288809	0.995746	2.83249
NME1	11	10	4	1	5	6	0.0288809	0.995746	-0.831229
PPPDE2	11	10	0	2	8	6	0.0288809	0.995746	1.50218
RNF43	11	10	4	3	3	3	0.0288809	0.995746	0
RPN2	11	10	1	1	8	6	0.0288809	0.995746	1.50218
MID1IP1	31	20	2	6	12	5	0.0295565	0.995746	4.85981
SIPA1L1	31	20	0	0	20	13	0.0295565	0.995746	3.32468
EIF4E3	78	41	10	5	26	20	0.0296168	0.995746	2.29882
C14orf176	29	19	5	10	4	6	0.0302546	0.995746	-1.72586
CSAD	29	19	3	2	14	3	0.0302546	0.995746	7.80747
LACE1	29	19	1	1	17	8	0.0302546	0.995746	5.0876
DLL3	13	11	1	6	4	1	0.0304466	0.995746	3.04385
KIAA0232	13	11	2	0	9	8	0.0304466	0.995746	0.683985
FAM78A	69	37	2	5	30	24	0.0306781	0.995746	2.06465
DUSP16	90	46	1	3	42	33	0.0307953	0.995746	2.46904
PTK2	27	18	0	0	18	16	0.0308861	0.995746	0.927109
MYH15	25	17	1	0	16	8	0.0314278	0.995746	4.61562
SNX17	15	12	2	0	10	3	0.0314351	0.995746	5.52277
ARPC1A	6	7	0	0	7	5	0.0316174	0.995746	1.60669
ATP11B	6	7	1	3	3	4	0.0316174	0.995746	-0.96441
C11orf58	6	7	1	0	6	3	0.0316174	0.995746	2.69027
C17orf48	6	7	0	0	7	5	0.0316174	0.995746	1.60669
CBL	6	7	0	0	7	0	0.0316174	0.995746	6.23832
CCDC106	6	7	1	2	4	0	0.0316174	0.995746	3.737
FAM53C	6	7	1	2	4	2	0.0316174	0.995746	1.99574
HEATR2	6	7	0	0	7	1	0.0316174	0.995746	5.54518
LRFN5	6	7	0	1	6	9	0.0316174	0.995746	-2.18616
MBD4	6	7	1	0	6	0	0.0316174	0.995746	5.46286
PPP1R12A	6	7	0	0	7	4	0.0316174	0.995746	2.50133
RSPO3	6	7	0	0	7	3	0.0316174	0.995746	3.46574
SLC25A36	6	7	0	0	7	0	0.0316174	0.995746	6.23832
SMARCD2	6	7	0	0	7	3	0.0316174	0.995746	3.46574
UNC119B	6	7	0	1	6	4	0.0316174	0.995746	1.72586
ATXN3	17	13	6	7	0	1	0.0319789	0.995746	-0.693147
NCOR1	17	13	0	0	13	4	0.0319789	0.995746	6.31083
C2orf86	21	15	1	1	13	8	0.0321169	0.995746	3.08279
CLTCL1	21	15	2	0	13	5	0.0321169	0.995746	5.4162
FAM13C	21	15	0	1	14	6	0.0321169	0.995746	5.1172
ASXL2	19	14	0	1	13	4	0.03218	0.995746	6.31083
P4HTM	38	23	3	8	12	9	0.0331021	0.995746	1.84242
ALPK2	3	5	0	0	5	1	0.0336144	0.995746	3.93848
ANGPTL5	3	5	2	2	1	2	0.0336144	0.995746	-1.04811
B3GALT2	3	5	0	1	4	0	0.0336144	0.995746	3.737
C17orf71	3	5	1	3	1	0	0.0336144	0.995746	0.693147
C19orf38	3	5	0	0	5	1	0.0336144	0.995746	3.93848
CELF5	3	5	0	0	5	3	0.0336144	0.995746	1.85904
ELOVL1	3	5	0	0	5	3	0.0336144	0.995746	1.85904
ERN1	3	5	0	0	5	0	0.0336144	0.995746	4.63163
ESYT1	3	5	1	0	4	1	0.0336144	0.995746	3.04385
IRF3	3	5	0	1	4	1	0.0336144	0.995746	3.04385
LOC100288730	3	5	4	1	0	0	0.0336144	0.995746	0
SYNCRIP	3	5	1	0	4	1	0.0336144	0.995746	3.04385
TJP1	3	5	0	0	5	5	0.0336144	0.995746	0
VPS8	3	5	0	0	5	5	0.0336144	0.995746	0
ZDHHC3	3	5	0	0	5	0	0.0336144	0.995746	4.63163
ZNF76	3	5	0	0	5	3	0.0336144	0.995746	1.85904
C11orf30	56	31	4	3	24	24	0.0341551	0.995746	0
SYT1	261	115	2	1	112	111	0.0342761	0.995746	0.121134
PCDHA1	77	40	0	4	36	16	0.0353705	0.995746	7.23025
PCDHA10	77	40	0	4	36	16	0.0353705	0.995746	7.23025
PCDHA11	77	40	0	4	36	16	0.0353705	0.995746	7.23025
PCDHA12	77	40	0	4	36	16	0.0353705	0.995746	7.23025
PCDHA13	77	40	0	4	36	16	0.0353705	0.995746	7.23025
PCDHA2	77	40	0	4	36	16	0.0353705	0.995746	7.23025
PCDHA3	77	40	0	4	36	16	0.0353705	0.995746	7.23025
PCDHA4	77	40	0	4	36	16	0.0353705	0.995746	7.23025
PCDHA5	77	40	0	4	36	16	0.0353705	0.995746	7.23025
PCDHA6	77	40	0	4	36	16	0.0353705	0.995746	7.23025
PCDHA7	77	40	0	4	36	16	0.0353705	0.995746	7.23025
PCDHA8	77	40	0	4	36	16	0.0353705	0.995746	7.23025
PCDHA9	77	40	0	4	36	16	0.0353705	0.995746	7.23025
GLCE	8	8	0	1	7	3	0.0360351	0.995746	3.46574
MYO3A	8	8	0	0	8	5	0.0360351	0.995746	2.33341
PHC2	8	8	0	0	8	3	0.0360351	0.995746	4.19245
PIGB	8	8	3	0	5	4	0.0360351	0.995746	0.894632
SAV1	8	8	0	1	7	2	0.0360351	0.995746	4.49707
TRIM2	142	67	1	0	66	60	0.0362065	0.995746	1.12553
RNGTT	43	25	1	2	22	7	0.0369502	0.995746	7.94528
C2orf34	150	70	1	0	69	59	0.0384537	0.995746	1.85538
APC2	10	9	4	5	0	0	0.038944	0.995746	0
C4orf21	10	9	0	0	9	2	0.038944	0.995746	5.90776
C8orf40	10	9	0	2	7	2	0.038944	0.995746	4.49707
DOK6	26	17	0	0	17	17	0.039575	0.995746	0
HSPC159	48	27	15	8	4	8	0.0403783	0.995746	-3.22804
MAGIX	24	16	7	5	4	5	0.0404642	0.995746	-0.894632
ATP2B2	12	10	0	0	10	2	0.0407538	0.995746	6.5541
COL2A1	12	10	0	0	10	5	0.0407538	0.995746	3.66372
DSC2	12	10	2	4	4	5	0.0407538	0.995746	-0.894632
HHAT	12	10	0	1	9	8	0.0407538	0.995746	0.683985
HINT2	12	10	1	1	8	5	0.0407538	0.995746	2.33341
PODXL2	12	10	1	3	6	4	0.0407538	0.995746	1.72586
STK38L	12	10	0	1	9	5	0.0407538	0.995746	3.01739
TBL1XR1	12	10	0	0	10	4	0.0407538	0.995746	4.55836
FSTL3	22	15	6	8	1	2	0.041225	0.995746	-1.04811
PRRT2	22	15	7	7	1	3	0.041225	0.995746	-2.07944
FAT3	14	11	0	0	11	1	0.0417601	0.995746	8.21515
LOC374443	14	11	1	1	9	2	0.0417601	0.995746	5.90776
NAA35	14	11	0	0	11	7	0.0417601	0.995746	2.66997
PAPD5	14	11	0	2	9	0	0.0417601	0.995746	7.64902
KIAA0195	20	14	2	0	12	2	0.0418093	0.995746	7.75018
C20orf94	46	26	0	0	26	17	0.0420912	0.995746	3.6187
KIFC1	18	13	4	0	9	7	0.0421542	0.995746	1.4107
MARCH6	18	13	1	1	11	11	0.0421542	0.995746	0
MORF4L2	18	13	0	1	12	8	0.0421542	0.995746	2.5264
PABPN1	18	13	4	8	1	4	0.0421542	0.995746	-3.04385
PGAP3	18	13	0	0	13	4	0.0421542	0.995746	6.31083
ADAM23	16	12	0	0	12	8	0.0421755	0.995746	2.5264
C14orf181	16	12	4	8	0	0	0.0421755	0.995746	0
SLC25A16	35	21	1	1	19	6	0.0429282	0.995746	7.48448
TMEM33	35	21	2	1	18	13	0.0429282	0.995746	2.45994
ARHGEF19	5	6	1	0	5	2	0.0431934	0.995746	2.89037
C22orf34	5	6	2	2	2	0	0.0431934	0.995746	1.74126
C6orf47	5	6	4	2	0	0	0.0431934	0.995746	0
CCNL1	5	6	5	1	0	0	0.0431934	0.995746	0
DHX29	5	6	0	0	6	1	0.0431934	0.995746	4.76971
DUSP5P	5	6	0	0	6	3	0.0431934	0.995746	2.69027
FBXL2	5	6	0	0	6	1	0.0431934	0.995746	4.76971
KLHL14	5	6	1	1	4	4	0.0431934	0.995746	0
LOH12CR2	5	6	4	2	0	0	0.0431934	0.995746	0
LSM1	5	6	2	2	2	1	0.0431934	0.995746	1.04811
PHF15	5	6	1	1	4	3	0.0431934	0.995746	0.96441
PIK3R1	5	6	1	2	3	1	0.0431934	0.995746	2.07944
PUS7L	5	6	1	0	5	3	0.0431934	0.995746	1.85904
SLC39A9	5	6	1	2	3	2	0.0431934	0.995746	1.03133
SNHG10	5	6	4	2	0	0	0.0431934	0.995746	0
TMEM110	5	6	0	1	5	2	0.0431934	0.995746	2.89037
AAGAB	2	4	0	0	4	1	0.0446955	0.995746	3.04385
ALG9	2	4	1	0	3	0	0.0446955	0.995746	2.77259
ALK	2	4	0	0	4	3	0.0446955	0.995746	0.96441
ALKBH8	2	4	0	0	4	2	0.0446955	0.995746	1.99574
C14orf50	2	4	0	0	4	1	0.0446955	0.995746	3.04385
CA10	2	4	0	0	4	3	0.0446955	0.995746	0.96441
CCDC22	2	4	0	0	4	1	0.0446955	0.995746	3.04385
CHCHD3	2	4	0	0	4	1	0.0446955	0.995746	3.04385
GAS8	2	4	0	0	4	0	0.0446955	0.995746	3.737
GNL1	2	4	1	3	0	0	0.0446955	0.995746	0
IFI30	2	4	1	0	3	1	0.0446955	0.995746	2.07944
KIAA1715	2	4	0	0	4	0	0.0446955	0.995746	3.737
LENG9	2	4	3	1	0	0	0.0446955	0.995746	0
LOC93622	2	4	1	2	1	0	0.0446955	0.995746	0.693147
MON1A	2	4	1	0	3	0	0.0446955	0.995746	2.77259
PIK3C2B	2	4	0	0	4	0	0.0446955	0.995746	3.737
S1PR5	2	4	0	2	2	0	0.0446955	0.995746	1.74126
SLC35B2	2	4	2	0	2	1	0.0446955	0.995746	1.04811
ST6GALNAC2	2	4	2	0	2	1	0.0446955	0.995746	1.04811
TELO2	2	4	1	0	3	0	0.0446955	0.995746	2.77259
TSHZ2	2	4	0	0	4	0	0.0446955	0.995746	3.737
USMG5	2	4	0	0	4	4	0.0446955	0.995746	0
XYLT2	2	4	0	0	4	0	0.0446955	0.995746	3.737
ZFPL1	2	4	2	2	0	2	0.0446955	0.995746	-1.74126
ZNF460	2	4	0	1	3	1	0.0446955	0.995746	2.07944
SPEN	110	53	0	2	51	31	0.0447319	0.995746	5.19515
ARID5B	265	115	7	14	94	83	0.0452069	0.995746	1.59513
ZNF219	42	24	2	4	18	8	0.0457115	0.995746	5.54273
CENPV	31	19	2	1	16	12	0.0460496	0.995746	2.08921
CHN1	268	116	1	0	115	74	0.0465866	0.995746	5.70718
EIF4G3	96	47	1	0	46	47	0.0471868	0.995746	-0.234526
PCDHAC1	77	39	0	4	35	16	0.0477967	0.995746	6.94587
BCL11B	27	17	0	0	17	13	0.0491414	0.995746	2.00481
ARHGAP19	7	7	0	0	7	4	0.0491651	0.995746	2.50133
C17orf75	7	7	2	1	4	5	0.0491651	0.995746	-0.894632
DCAF10	7	7	1	1	5	4	0.0491651	0.995746	0.894632
DPEP2	7	7	1	0	6	0	0.0491651	0.995746	5.46286
DSCAML1	7	7	0	0	7	3	0.0491651	0.995746	3.46574
GNA13	7	7	0	2	5	1	0.0491651	0.995746	3.93848
LOC401431	7	7	2	1	4	1	0.0491651	0.995746	3.04385
NCRNA00169	7	7	0	3	4	1	0.0491651	0.995746	3.04385
NRG2	7	7	1	2	4	2	0.0491651	0.995746	1.99574
NTNG2	7	7	1	1	5	6	0.0491651	0.995746	-0.831229
NUDC	7	7	0	0	7	4	0.0491651	0.995746	2.50133
PREX2	7	7	0	0	7	11	0.0491651	0.995746	-2.66997
TBXAS1	7	7	0	0	7	1	0.0491651	0.995746	5.54518
TIAL1	7	7	0	1	6	6	0.0491651	0.995746	0
TMPRSS15	7	7	0	0	7	1	0.0491651	0.995746	5.54518
ZNF367	7	7	2	3	2	1	0.0491651	0.995746	1.04811
ZNF800	7	7	2	3	2	0	0.0491651	0.995746	1.74126
HOXB3	47	26	6	13	7	5	0.0494862	0.995746	1.60669
RPL27A	38	22	8	14	0	5	0.0495885	0.995746	-4.63163
CLEC2B	75	38	5	5	28	35	0.0500423	0.995746	-2.16827
EFR3B	25	16	0	0	16	10	0.0506256	0.995746	3.2853
C8orf86	23	15	3	2	10	5	0.0520278	0.995746	3.66372
ARHGEF38	9	8	2	2	4	2	0.0527413	0.995746	1.99574
ERAP2	9	8	2	0	6	2	0.0527413	0.995746	3.7216
FAM120AOS	9	8	0	4	4	1	0.0527413	0.995746	3.04385
GK	9	8	0	0	8	4	0.0527413	0.995746	3.22804
KCNN1	9	8	2	0	6	2	0.0527413	0.995746	3.7216
LOXL1	9	8	1	2	5	2	0.0527413	0.995746	2.89037
SH3PXD2B	9	8	0	0	8	6	0.0527413	0.995746	1.50218
ZCCHC8	34	20	0	1	19	9	0.0537058	0.995746	5.29832
CAPZA1	19	13	2	3	8	4	0.0543944	0.995746	3.22804
DOCK1	19	13	0	0	13	12	0.0543944	0.995746	0.556387
ARHGDIA	11	9	1	1	7	0	0.0547062	0.995746	6.23832
ELK4	11	9	1	4	4	2	0.0547062	0.995746	1.99574
GANAB	11	9	0	0	9	5	0.0547062	0.995746	3.01739
LYSMD2	11	9	0	1	8	6	0.0547062	0.995746	1.50218
MCFD2	11	9	0	0	9	6	0.0547062	0.995746	2.18616
NDUFAF3	11	9	0	3	6	1	0.0547062	0.995746	4.76971
PARP9	11	9	2	0	7	1	0.0547062	0.995746	5.54518
ZNF692	11	9	2	4	3	4	0.0547062	0.995746	-0.96441
ABHD14B	17	12	5	4	3	2	0.0552181	0.995746	1.03133
PSTPIP2	17	12	0	0	12	6	0.0552181	0.995746	4.02858
SERTAD2	17	12	0	0	12	5	0.0552181	0.995746	4.85981
SOCS5	17	12	0	1	11	5	0.0552181	0.995746	4.27667
ACAA2	13	10	0	1	9	10	0.0555678	0.995746	-0.646333
BAD	13	10	2	2	6	6	0.0555678	0.995746	0
CRYZL1	13	10	3	1	6	3	0.0555678	0.995746	2.69027
PARP11	13	10	2	4	4	4	0.0555678	0.995746	0
C11orf54	15	11	1	0	10	5	0.0556622	0.995746	3.66372
KLF12	15	11	1	1	9	2	0.0556622	0.995746	5.90776
LETMD1	15	11	0	4	7	6	0.0556622	0.995746	0.775464
LRP5	15	11	0	0	11	3	0.0556622	0.995746	6.13571
MLL3	15	11	1	0	10	4	0.0556622	0.995746	4.55836
PPP1R12B	15	11	0	0	11	2	0.0556622	0.995746	7.16704
TOMM7	15	11	2	0	9	4	0.0556622	0.995746	3.91202
MIB1	32	19	0	2	17	12	0.0558424	0.995746	2.56119
MRPS6	32	19	0	0	19	14	0.0558424	0.995746	2.36728
LRBA	147	67	1	0	66	41	0.0570917	0.995746	5.35134
AP1AR	1	3	0	0	3	1	0.0582261	0.995746	2.07944
BBS7	1	3	1	2	0	0	0.0582261	0.995746	0
BOD1	1	3	0	2	1	2	0.0582261	0.995746	-1.04811
BSDC1	1	3	0	0	3	0	0.0582261	0.995746	2.77259
C10orf25	1	3	2	1	0	0	0.0582261	0.995746	0
C14orf178	1	3	1	0	2	1	0.0582261	0.995746	1.04811
C16orf73	1	3	0	0	3	3	0.0582261	0.995746	0
C18orf54	1	3	0	1	2	0	0.0582261	0.995746	1.74126
C21orf119	1	3	1	2	0	0	0.0582261	0.995746	0
C9orf50	1	3	0	3	0	0	0.0582261	0.995746	0
CARNS1	1	3	0	1	2	1	0.0582261	0.995746	1.04811
CDC25C	1	3	0	0	3	0	0.0582261	0.995746	2.77259
CDO1	1	3	0	1	2	0	0.0582261	0.995746	1.74126
CSNK2A2	1	3	0	1	2	4	0.0582261	0.995746	-1.99574
DDX4	1	3	0	0	3	0	0.0582261	0.995746	2.77259
E2F6	1	3	0	0	3	1	0.0582261	0.995746	2.07944
ECT2L	1	3	0	1	2	0	0.0582261	0.995746	1.74126
EMILIN2	1	3	0	0	3	2	0.0582261	0.995746	1.03133
ESPL1	1	3	0	2	1	1	0.0582261	0.995746	0
FAM83E	1	3	0	0	3	0	0.0582261	0.995746	2.77259
FBXO2	1	3	3	0	0	3	0.0582261	0.995746	-2.77259
GAS2L1	1	3	0	1	2	2	0.0582261	0.995746	0
HSF2	1	3	0	1	2	0	0.0582261	0.995746	1.74126
HYAL2	1	3	0	0	3	4	0.0582261	0.995746	-0.96441
KCTD5	1	3	0	0	3	0	0.0582261	0.995746	2.77259
KIAA0831	1	3	0	0	3	1	0.0582261	0.995746	2.07944
MICAL2	1	3	0	0	3	0	0.0582261	0.995746	2.77259
MPP1	1	3	0	0	3	2	0.0582261	0.995746	1.03133
MYO15A	1	3	0	1	2	3	0.0582261	0.995746	-1.03133
NFATC2IP	1	3	0	2	1	2	0.0582261	0.995746	-1.04811
NIPA1	1	3	0	0	3	0	0.0582261	0.995746	2.77259
PCDHGA5	1	3	0	0	3	0	0.0582261	0.995746	2.77259
PCDHGA6	1	3	0	0	3	0	0.0582261	0.995746	2.77259
PCDHGA7	1	3	0	0	3	0	0.0582261	0.995746	2.77259
PCDHGA8	1	3	0	0	3	0	0.0582261	0.995746	2.77259
PCDHGA9	1	3	0	0	3	0	0.0582261	0.995746	2.77259
PCDHGB3	1	3	0	0	3	0	0.0582261	0.995746	2.77259
PCDHGB4	1	3	0	0	3	0	0.0582261	0.995746	2.77259
PCDHGB5	1	3	0	0	3	0	0.0582261	0.995746	2.77259
PCDHGB6	1	3	0	0	3	0	0.0582261	0.995746	2.77259
PIGF	1	3	0	0	3	2	0.0582261	0.995746	1.03133
PPOX	1	3	2	1	0	1	0.0582261	0.995746	-0.693147
PPP1R15B	1	3	3	0	0	0	0.0582261	0.995746	0
PRINS	1	3	2	1	0	0	0.0582261	0.995746	0
RAP2A	1	3	1	0	2	0	0.0582261	0.995746	1.74126
RASGRP2	1	3	0	0	3	1	0.0582261	0.995746	2.07944
RIT1	1	3	0	1	2	1	0.0582261	0.995746	1.04811
RMST	1	3	1	0	2	0	0.0582261	0.995746	1.74126
SESN2	1	3	0	0	3	1	0.0582261	0.995746	2.07944
SLC27A3	1	3	3	0	0	0	0.0582261	0.995746	0
SLC6A9	1	3	0	0	3	1	0.0582261	0.995746	2.07944
SPC25	1	3	0	0	3	0	0.0582261	0.995746	2.77259
TDRD1	1	3	0	0	3	0	0.0582261	0.995746	2.77259
TMEM170B	1	3	0	0	3	0	0.0582261	0.995746	2.77259
TRIM41	1	3	1	2	0	0	0.0582261	0.995746	0
TUSC1	1	3	3	0	0	0	0.0582261	0.995746	0
UBE2A	1	3	1	0	2	0	0.0582261	0.995746	1.74126
UBQLN1	1	3	1	2	0	3	0.0582261	0.995746	-2.77259
VTA1	1	3	0	0	3	0	0.0582261	0.995746	2.77259
ZCCHC4	1	3	0	0	3	1	0.0582261	0.995746	2.07944
ZFC3H1	1	3	0	1	2	0	0.0582261	0.995746	1.74126
ZNF573	1	3	0	0	3	1	0.0582261	0.995746	2.07944
ZNF674	1	3	0	0	3	1	0.0582261	0.995746	2.07944
ZXDA	1	3	1	2	0	0	0.0582261	0.995746	0
RPRD2	39	22	1	3	18	5	0.0588886	0.995746	7.87613
ACP2	4	5	1	1	3	6	0.0594934	0.995746	-2.69027
ARHGEF11	4	5	1	2	2	1	0.0594934	0.995746	1.04811
C14orf4	4	5	4	1	0	0	0.0594934	0.995746	0
C16orf5	4	5	0	0	5	3	0.0594934	0.995746	1.85904
C1orf91	4	5	1	0	4	0	0.0594934	0.995746	3.737
CHD8	4	5	0	1	4	2	0.0594934	0.995746	1.99574
DEDD	4	5	0	1	4	1	0.0594934	0.995746	3.04385
ERCC8	4	5	1	2	2	0	0.0594934	0.995746	1.74126
ERLIN2	4	5	0	1	4	4	0.0594934	0.995746	0
FLJ35776	4	5	0	1	4	2	0.0594934	0.995746	1.99574
GORASP2	4	5	0	0	5	1	0.0594934	0.995746	3.93848
LIMD1	4	5	0	1	4	1	0.0594934	0.995746	3.04385
LOC152217	4	5	3	2	0	0	0.0594934	0.995746	0
LOC283314	4	5	1	1	3	0	0.0594934	0.995746	2.77259
MON2	4	5	0	1	4	1	0.0594934	0.995746	3.04385
MRP63	4	5	5	0	0	0	0.0594934	0.995746	0
NMB	4	5	1	1	3	1	0.0594934	0.995746	2.07944
NME4	4	5	0	4	1	1	0.0594934	0.995746	0
NT5M	4	5	1	0	4	2	0.0594934	0.995746	1.99574
PIGK	4	5	0	0	5	0	0.0594934	0.995746	4.63163
PNPLA7	4	5	1	2	2	1	0.0594934	0.995746	1.04811
RARA	4	5	0	0	5	2	0.0594934	0.995746	2.89037
RBM15	4	5	1	3	1	0	0.0594934	0.995746	0.693147
RBM16	4	5	0	0	5	6	0.0594934	0.995746	-0.831229
RNF19A	4	5	0	0	5	3	0.0594934	0.995746	1.85904
SOCS2	4	5	0	2	3	2	0.0594934	0.995746	1.03133
TLCD1	4	5	0	1	4	3	0.0594934	0.995746	0.96441
UBE2N	4	5	0	0	5	1	0.0594934	0.995746	3.93848
WT1	4	5	1	1	3	3	0.0594934	0.995746	0
SALL4	28	17	0	0	17	3	0.060225	0.995746	9.28004
UGT1A6	53	28	1	2	25	11	0.0610314	0.995746	6.40619
CTPS2	26	16	5	9	2	3	0.0624397	0.995746	-1.03133
UNK	116	54	0	1	53	41	0.0637859	0.995746	2.80145
HERC4	24	15	0	2	13	5	0.0646386	0.995746	5.4162
SEMA3C	24	15	0	0	15	5	0.0646386	0.995746	6.45872
C7orf55	22	14	1	1	12	11	0.0667864	0.995746	0.583143
TTC7B	22	14	0	0	14	7	0.0667864	0.995746	4.34173
PPP2R4	49	26	0	0	26	18	0.0670106	0.995746	3.16357
BMX	6	6	0	0	6	5	0.0675849	0.995746	0.831229
C18orf16	6	6	0	0	6	4	0.0675849	0.995746	1.72586
CA5BP	6	6	0	0	6	1	0.0675849	0.995746	4.76971
CDCA7L	6	6	0	0	6	1	0.0675849	0.995746	4.76971
CNOT6	6	6	0	2	4	1	0.0675849	0.995746	3.04385
CXorf58	6	6	0	0	6	3	0.0675849	0.995746	2.69027
DNAJC5G	6	6	3	2	1	0	0.0675849	0.995746	0.693147
FBXO4	6	6	0	0	6	5	0.0675849	0.995746	0.831229
GALNT11	6	6	0	0	6	0	0.0675849	0.995746	5.46286
MPRIP	6	6	0	0	6	1	0.0675849	0.995746	4.76971
OSBPL11	6	6	2	1	3	3	0.0675849	0.995746	0
SFRS2B	6	6	4	2	0	0	0.0675849	0.995746	0
SPCS1	6	6	2	2	2	2	0.0675849	0.995746	0
STIM2	6	6	0	0	6	5	0.0675849	0.995746	0.831229
TBK1	6	6	0	0	6	4	0.0675849	0.995746	1.72586
TPBG	6	6	3	3	0	0	0.0675849	0.995746	0
TYMP	6	6	1	4	1	4	0.0675849	0.995746	-3.04385
ZBTB41	6	6	3	0	3	4	0.0675849	0.995746	-0.96441
ZFP91	6	6	0	0	6	2	0.0675849	0.995746	3.7216
ZFP91-CNTF	6	6	0	0	6	2	0.0675849	0.995746	3.7216
ZZZ3	6	6	0	0	6	4	0.0675849	0.995746	1.72586
MIR548F5	68	34	0	0	34	33	0.0682463	0.995746	0.296158
DDX26B	20	13	1	1	11	5	0.0688337	0.995746	4.27667
SLC25A17	20	13	0	1	12	8	0.0688337	0.995746	2.5264
ABRA	0	2	0	0	2	0	0.069008	0.995746	1.74126
ACADVL	0	2	1	0	1	0	0.069008	0.995746	0.693147
ADCY7	0	2	0	0	2	0	0.069008	0.995746	1.74126
AMBRA1	0	2	1	0	1	0	0.069008	0.995746	0.693147
ANXA13	0	2	0	0	2	0	0.069008	0.995746	1.74126
AP1G2	0	2	1	0	1	0	0.069008	0.995746	0.693147
ARPM1	0	2	1	1	0	0	0.069008	0.995746	0
ATPAF1	0	2	0	0	2	1	0.069008	0.995746	1.04811
B4GALT3	0	2	1	0	1	0	0.069008	0.995746	0.693147
BCAR3	0	2	0	0	2	1	0.069008	0.995746	1.04811
BRPF1	0	2	0	0	2	0	0.069008	0.995746	1.74126
C10orf88	0	2	0	1	1	0	0.069008	0.995746	0.693147
C12orf59	0	2	1	1	0	0	0.069008	0.995746	0
C1orf95	0	2	0	0	2	0	0.069008	0.995746	1.74126
C22orf15	0	2	1	0	1	0	0.069008	0.995746	0.693147
C22orf23	0	2	0	0	2	0	0.069008	0.995746	1.74126
C2CD4A	0	2	1	0	1	0	0.069008	0.995746	0.693147
C4orf26	0	2	0	0	2	0	0.069008	0.995746	1.74126
C6orf223	0	2	0	0	2	0	0.069008	0.995746	1.74126
C8G	0	2	0	1	1	1	0.069008	0.995746	0
CACNA1G	0	2	0	2	0	1	0.069008	0.995746	-0.693147
CLIC5	0	2	1	0	1	1	0.069008	0.995746	0
CPAMD8	0	2	0	0	2	0	0.069008	0.995746	1.74126
CTNND2	0	2	0	0	2	0	0.069008	0.995746	1.74126
CYBA	0	2	0	1	1	0	0.069008	0.995746	0.693147
DAGLA	0	2	0	0	2	0	0.069008	0.995746	1.74126
DNTT	0	2	0	0	2	0	0.069008	0.995746	1.74126
DUSP15	0	2	2	0	0	0	0.069008	0.995746	0
EPHB6	0	2	0	0	2	1	0.069008	0.995746	1.04811
FAIM2	0	2	0	0	2	0	0.069008	0.995746	1.74126
FAM163A	0	2	0	2	0	1	0.069008	0.995746	-0.693147
FAM81B	0	2	0	0	2	0	0.069008	0.995746	1.74126
FASAS	0	2	1	1	0	0	0.069008	0.995746	0
FBXL12	0	2	2	0	0	1	0.069008	0.995746	-0.693147
FOXD1	0	2	1	1	0	0	0.069008	0.995746	0
GATA6	0	2	0	0	2	0	0.069008	0.995746	1.74126
GNPAT	0	2	0	0	2	1	0.069008	0.995746	1.04811
HCG22	0	2	1	1	0	0	0.069008	0.995746	0
HEBP1	0	2	1	0	1	0	0.069008	0.995746	0.693147
HOXC10	0	2	1	1	0	0	0.069008	0.995746	0
HSD17B4	0	2	0	0	2	0	0.069008	0.995746	1.74126
HSH2D	0	2	0	0	2	0	0.069008	0.995746	1.74126
HTR3D	0	2	0	2	0	1	0.069008	0.995746	-0.693147
KLHL9	0	2	1	1	0	0	0.069008	0.995746	0
LDOC1L	0	2	0	1	1	0	0.069008	0.995746	0.693147
LOC100128003	0	2	1	1	0	0	0.069008	0.995746	0
LOC152024	0	2	0	1	1	0	0.069008	0.995746	0.693147
MAN2B2	0	2	0	0	2	0	0.069008	0.995746	1.74126
MGAT2	0	2	1	1	0	0	0.069008	0.995746	0
MORC2	0	2	2	0	0	0	0.069008	0.995746	0
MRPL33	0	2	0	0	2	0	0.069008	0.995746	1.74126
NCRNA00029	0	2	1	0	1	0	0.069008	0.995746	0.693147
NEXN	0	2	0	0	2	0	0.069008	0.995746	1.74126
NOL4	0	2	0	0	2	1	0.069008	0.995746	1.04811
OTC	0	2	0	0	2	1	0.069008	0.995746	1.04811
P2RX1	0	2	0	1	1	0	0.069008	0.995746	0.693147
PDE6A	0	2	0	0	2	0	0.069008	0.995746	1.74126
PIP4K2C	0	2	0	0	2	0	0.069008	0.995746	1.74126
PIPSL	0	2	1	1	0	0	0.069008	0.995746	0
PLVAP	0	2	0	0	2	0	0.069008	0.995746	1.74126
PPARD	0	2	0	0	2	1	0.069008	0.995746	1.04811
PRND	0	2	0	2	0	0	0.069008	0.995746	0
PSEN2	0	2	0	1	1	1	0.069008	0.995746	0
PSRC1	0	2	1	1	0	0	0.069008	0.995746	0
REEP6	0	2	0	0	2	1	0.069008	0.995746	1.04811
RFNG	0	2	0	0	2	0	0.069008	0.995746	1.74126
RIN1	0	2	0	1	1	0	0.069008	0.995746	0.693147
RNF149	0	2	0	0	2	0	0.069008	0.995746	1.74126
RRAGA	0	2	0	2	0	0	0.069008	0.995746	0
RTEL1	0	2	0	1	1	1	0.069008	0.995746	0
S100B	0	2	0	1	1	0	0.069008	0.995746	0.693147
SGSM1	0	2	0	0	2	0	0.069008	0.995746	1.74126
SH3TC1	0	2	0	1	1	1	0.069008	0.995746	0
SLC6A15	0	2	1	0	1	0	0.069008	0.995746	0.693147
SLC6A16	0	2	1	0	1	0	0.069008	0.995746	0.693147
SMPX	0	2	0	0	2	0	0.069008	0.995746	1.74126
SNORD104	0	2	1	1	0	0	0.069008	0.995746	0
SNX22	0	2	0	2	0	1	0.069008	0.995746	-0.693147
SYNPR	0	2	0	1	1	2	0.069008	0.995746	-1.04811
SYT2	0	2	0	0	2	0	0.069008	0.995746	1.74126
TFPI2	0	2	0	1	1	0	0.069008	0.995746	0.693147
TGM2	0	2	0	1	1	0	0.069008	0.995746	0.693147
THAP8	0	2	0	1	1	1	0.069008	0.995746	0
TINAG	0	2	0	0	2	1	0.069008	0.995746	1.04811
TLL2	0	2	0	0	2	2	0.069008	0.995746	0
TNFRSF13C	0	2	0	0	2	0	0.069008	0.995746	1.74126
TNFSF9	0	2	0	0	2	1	0.069008	0.995746	1.04811
TRIM69	0	2	0	0	2	0	0.069008	0.995746	1.74126
TSG1	0	2	0	0	2	0	0.069008	0.995746	1.74126
USF2	0	2	2	0	0	0	0.069008	0.995746	0
ZNF177	0	2	0	0	2	0	0.069008	0.995746	1.74126
ZNF200	0	2	1	0	1	0	0.069008	0.995746	0.693147
ZNF225	0	2	0	0	2	0	0.069008	0.995746	1.74126
ZNF451	0	2	0	1	1	2	0.069008	0.995746	-1.04811
ZNF559	0	2	0	0	2	0	0.069008	0.995746	1.74126
ZNF792	0	2	1	0	1	0	0.069008	0.995746	0.693147
SQSTM1	40	22	2	0	20	7	0.0693451	0.995746	7.13418
FBXO31	61	31	1	0	30	14	0.0694296	0.995746	6.43259
ZNF462	61	31	0	2	29	26	0.0694296	0.995746	1.01797
DYM	402	165	4	2	159	165	0.07024	0.995746	-0.541054
CENPT	95	45	2	1	42	31	0.0712098	0.995746	3.08059
ADCY10	8	7	0	1	6	5	0.0718063	0.995746	0.831229
CACNA1C	8	7	5	2	0	1	0.0718063	0.995746	-0.693147
CARD6	8	7	2	3	2	1	0.0718063	0.995746	1.04811
CCDC85C	8	7	0	0	7	5	0.0718063	0.995746	1.60669
CENPBD1	8	7	3	4	0	0	0.0718063	0.995746	0
CORIN	8	7	0	0	7	6	0.0718063	0.995746	0.775464
FBXO9	8	7	2	3	2	1	0.0718063	0.995746	1.04811
FXYD1	8	7	1	0	6	3	0.0718063	0.995746	2.69027
GPR108	8	7	0	1	6	7	0.0718063	0.995746	-0.775464
ITPRIP	8	7	0	0	7	3	0.0718063	0.995746	3.46574
LDB3	8	7	0	0	7	2	0.0718063	0.995746	4.49707
MMP16	8	7	1	1	5	4	0.0718063	0.995746	0.894632
NEIL3	8	7	1	1	5	5	0.0718063	0.995746	0
RAB6A	8	7	1	0	6	3	0.0718063	0.995746	2.69027
RNF19B	8	7	0	3	4	1	0.0718063	0.995746	3.04385
SLC7A8	8	7	2	0	5	4	0.0718063	0.995746	0.894632
CDC25A	16	11	2	3	6	6	0.0723183	0.995746	0
EP300	16	11	3	3	5	4	0.0723183	0.995746	0.894632
RXFP2	16	11	0	0	11	5	0.0723183	0.995746	4.27667
NKIRAS2	38	21	0	1	20	10	0.0725985	0.995746	5.07715
ATN1	29	17	0	6	11	8	0.0729053	0.995746	1.94326
GARNL3	29	17	2	3	12	10	0.0729053	0.995746	1.19609
MAN2A1	29	17	1	1	15	3	0.0729053	0.995746	8.31777
CCDC34	14	10	2	3	5	5	0.0735114	0.995746	0
CECR1	14	10	0	0	10	3	0.0735114	0.995746	5.52277
LOC388796	14	10	4	2	4	2	0.0735114	0.995746	1.99574
TMEM167B	14	10	2	0	8	6	0.0735114	0.995746	1.50218
ZNF423	14	10	0	0	10	5	0.0735114	0.995746	3.66372
SMARCA2	52	27	0	0	27	14	0.0735971	0.995746	5.43903
STX16	52	27	2	2	23	11	0.0735971	0.995746	5.66296
ARHGEF18	10	8	0	0	8	6	0.0736808	0.995746	1.50218
CNOT6L	10	8	1	2	5	2	0.0736808	0.995746	2.89037
FLJ13224	10	8	5	3	0	0	0.0736808	0.995746	0
GPI	10	8	3	4	1	3	0.0736808	0.995746	-2.07944
MASTL	10	8	4	3	1	2	0.0736808	0.995746	-1.04811
NDUFAF1	10	8	1	1	6	1	0.0736808	0.995746	4.76971
OTUB1	10	8	0	4	4	2	0.0736808	0.995746	1.99574
PCGF6	10	8	1	0	7	5	0.0736808	0.995746	1.60669
PLEKHM2	10	8	1	0	7	2	0.0736808	0.995746	4.49707
POGZ	10	8	0	2	6	4	0.0736808	0.995746	1.72586
RC3H2	10	8	0	0	8	4	0.0736808	0.995746	3.22804
TET2	10	8	0	3	5	4	0.0736808	0.995746	0.894632
TM9SF3	10	8	1	0	7	2	0.0736808	0.995746	4.49707
ASPH	12	9	2	0	7	8	0.0740752	0.995746	-0.726712
C15orf34	12	9	7	2	0	0	0.0740752	0.995746	0
C16orf7	12	9	1	3	5	4	0.0740752	0.995746	0.894632
CCR10	12	9	6	2	1	0	0.0740752	0.995746	0.693147
FLJ39582	12	9	6	1	2	1	0.0740752	0.995746	1.04811
PCNX	12	9	1	0	8	3	0.0740752	0.995746	4.19245
POLK	12	9	0	0	9	6	0.0740752	0.995746	2.18616
PRKAR1A	12	9	2	2	5	7	0.0740752	0.995746	-1.60669
SOX21	12	9	5	4	0	0	0.0740752	0.995746	0
USP46	12	9	0	0	9	2	0.0740752	0.995746	5.90776
BNC2	27	16	0	0	16	10	0.0759891	0.995746	3.2853
JAM2	27	16	1	0	15	10	0.0759891	0.995746	2.795
PIK3R2	27	16	0	2	14	7	0.0759891	0.995746	4.34173
C15orf17	36	20	2	7	11	12	0.0760091	0.995746	-0.583143
C5orf13	36	20	1	2	17	12	0.0760091	0.995746	2.56119
DET1	36	20	0	0	20	12	0.0760091	0.995746	3.88107
MIR548F1	36	20	0	0	20	11	0.0760091	0.995746	4.46421
PLK1S1	43	23	0	1	22	14	0.0772247	0.995746	3.60355
IMMP2L	91	43	1	0	42	28	0.0780681	0.995746	4.05101
CRADD	161	71	1	1	69	60	0.0787011	0.995746	1.65972
KIF9	55	28	2	1	25	19	0.0802018	0.995746	2.36715
LRRC8B	89	42	20	13	9	8	0.0817642	0.995746	0.683985
SEC22B	23	14	0	1	13	11	0.0823456	0.995746	1.13953
AMACR	3	4	0	0	4	1	0.0828702	0.995746	3.04385
BAP1	3	4	0	1	3	4	0.0828702	0.995746	-0.96441
C12orf52	3	4	1	2	1	2	0.0828702	0.995746	-1.04811
CASP7	3	4	1	1	2	2	0.0828702	0.995746	0
CITED1	3	4	1	3	0	1	0.0828702	0.995746	-0.693147
COL9A2	3	4	0	0	4	1	0.0828702	0.995746	3.04385
COLEC12	3	4	2	1	1	1	0.0828702	0.995746	0
COQ2	3	4	1	0	3	1	0.0828702	0.995746	2.07944
DNAH9	3	4	0	0	4	0	0.0828702	0.995746	3.737
EID2	3	4	2	2	0	0	0.0828702	0.995746	0
FAM129C	3	4	2	2	0	2	0.0828702	0.995746	-1.74126
FIG4	3	4	1	0	3	4	0.0828702	0.995746	-0.96441
FLJ40852	3	4	0	1	3	1	0.0828702	0.995746	2.07944
GPR137	3	4	2	1	1	0	0.0828702	0.995746	0.693147
GYPC	3	4	0	0	4	0	0.0828702	0.995746	3.737
HCG11	3	4	1	3	0	0	0.0828702	0.995746	0
HDAC2	3	4	2	2	0	0	0.0828702	0.995746	0
KCNIP4	3	4	0	0	4	4	0.0828702	0.995746	0
KIAA1279	3	4	0	1	3	0	0.0828702	0.995746	2.77259
KIAA1737	3	4	0	0	4	1	0.0828702	0.995746	3.04385
KIAA1967	3	4	0	0	4	0	0.0828702	0.995746	3.737
LDLRAD2	3	4	1	1	2	0	0.0828702	0.995746	1.74126
LOC100144603	3	4	1	0	3	0	0.0828702	0.995746	2.77259
LOC202781	3	4	1	3	0	0	0.0828702	0.995746	0
LRRCC1	3	4	0	0	4	1	0.0828702	0.995746	3.04385
MBD2	3	4	0	0	4	3	0.0828702	0.995746	0.96441
MFAP2	3	4	0	0	4	0	0.0828702	0.995746	3.737
MTF1	3	4	0	1	3	0	0.0828702	0.995746	2.77259
NDUFA3	3	4	0	0	4	3	0.0828702	0.995746	0.96441
NEUROG2	3	4	1	2	1	3	0.0828702	0.995746	-2.07944
NPEPPS	3	4	0	0	4	0	0.0828702	0.995746	3.737
NR2C1	3	4	1	0	3	0	0.0828702	0.995746	2.77259
PACSIN2	3	4	0	0	4	2	0.0828702	0.995746	1.99574
PPT1	3	4	0	0	4	2	0.0828702	0.995746	1.99574
PRMT6	3	4	3	1	0	0	0.0828702	0.995746	0
SERINC4	3	4	0	1	3	1	0.0828702	0.995746	2.07944
SETD4	3	4	0	0	4	4	0.0828702	0.995746	0
SIAH2	3	4	0	0	4	6	0.0828702	0.995746	-1.72586
SLC29A3	3	4	0	0	4	0	0.0828702	0.995746	3.737
SPOCK1	3	4	0	0	4	0	0.0828702	0.995746	3.737
ST3GAL5	3	4	0	0	4	1	0.0828702	0.995746	3.04385
TBC1D13	3	4	0	0	4	2	0.0828702	0.995746	1.99574
TEKT2	3	4	4	0	0	0	0.0828702	0.995746	0
UBQLN2	3	4	1	3	0	0	0.0828702	0.995746	0
WDR13	3	4	2	2	0	0	0.0828702	0.995746	0
WRNIP1	3	4	1	2	1	1	0.0828702	0.995746	0
XIST	3	4	1	2	1	0	0.0828702	0.995746	0.693147
ZNF296	3	4	0	3	1	0	0.0828702	0.995746	0.693147
R3HDM1	32	18	0	0	18	11	0.0833254	0.995746	3.59947
TPM3	53	27	1	0	26	24	0.0842052	0.995746	0.723337
ZFAND6	82	39	0	0	39	24	0.0847845	0.995746	4.68395
HIRIP3	21	13	7	4	2	3	0.0855631	0.995746	-1.03133
MED13	21	13	1	1	11	7	0.0855631	0.995746	2.66997
RBMS3	102	47	0	2	45	35	0.0872087	0.995746	2.62121
ARHGEF12	30	17	1	0	16	12	0.0872405	0.995746	2.08921
DOCK8	30	17	1	2	14	4	0.0872405	0.995746	6.84306
MEIS1	51	26	1	2	23	21	0.0884393	0.995746	0.786965
HDDC3	19	12	7	3	2	2	0.0887467	0.995746	0
HECTD1	19	12	2	3	7	6	0.0887467	0.995746	0.775464
LOC100289341	19	12	8	4	0	0	0.0887467	0.995746	0
HTR2C	80	38	7	6	25	20	0.0888754	0.995746	1.94198
NFAT5	155	68	11	14	43	45	0.0889059	0.995746	-0.488213
KIF3B	63	31	0	0	31	17	0.0889373	0.995746	5.27605
MGAT4C	90	42	0	0	42	37	0.0904117	0.995746	1.31948
EML6	28	16	0	0	16	6	0.0913307	0.995746	6.11779
HOMER1	28	16	1	1	14	10	0.0913307	0.995746	2.2847
B3GAT3	17	11	0	0	11	6	0.0918225	0.995746	3.44544
GPR126	17	11	0	1	10	3	0.0918225	0.995746	5.52277
TMEM91	17	11	0	2	9	5	0.0918225	0.995746	3.01739
TNFRSF19	17	11	3	3	5	4	0.0918225	0.995746	0.894632
TBC1D16	78	37	2	3	32	23	0.0931861	0.995746	3.0665
PCOLCE2	35	19	1	0	18	5	0.0936307	0.995746	7.87613
CAND1	5	5	0	0	5	1	0.0938383	0.995746	3.93848
CAPN1	5	5	0	1	4	3	0.0938383	0.995746	0.96441
CAST	5	5	0	0	5	0	0.0938383	0.995746	4.63163
CCDC138	5	5	0	0	5	1	0.0938383	0.995746	3.93848
CPEB1	5	5	1	1	3	3	0.0938383	0.995746	0
DDR1	5	5	0	0	5	0	0.0938383	0.995746	4.63163
DYX1C1	5	5	0	0	5	1	0.0938383	0.995746	3.93848
ESR2	5	5	2	1	2	2	0.0938383	0.995746	0
GOLPH3L	5	5	2	0	3	6	0.0938383	0.995746	-2.69027
GPAA1	5	5	1	4	0	4	0.0938383	0.995746	-3.737
HERPUD1	5	5	1	2	2	3	0.0938383	0.995746	-1.03133
LARP1B	5	5	0	0	5	4	0.0938383	0.995746	0.894632
MTMR10	5	5	0	1	4	1	0.0938383	0.995746	3.04385
NCSTN	5	5	0	0	5	1	0.0938383	0.995746	3.93848
NEAT1	5	5	3	2	0	0	0.0938383	0.995746	0
PIK3R4	5	5	1	1	3	3	0.0938383	0.995746	0
PITPNA	5	5	2	2	1	1	0.0938383	0.995746	0
PLIN1	5	5	2	3	0	0	0.0938383	0.995746	0
PM20D2	5	5	1	0	4	1	0.0938383	0.995746	3.04385
PRDM12	5	5	1	1	3	0	0.0938383	0.995746	2.77259
PRR13	5	5	0	0	5	3	0.0938383	0.995746	1.85904
TMEM126B	5	5	0	0	5	2	0.0938383	0.995746	2.89037
UGGT1	5	5	0	0	5	1	0.0938383	0.995746	3.93848
ZNF18	5	5	1	0	4	1	0.0938383	0.995746	3.04385
ZNF616	5	5	0	1	4	3	0.0938383	0.995746	0.96441
ZNF787	5	5	0	0	5	3	0.0938383	0.995746	1.85904
GPC5	15	10	0	0	10	9	0.094679	0.995746	0.646333
SULF1	15	10	2	0	8	3	0.094679	0.995746	4.19245
CSNK1E	26	15	1	2	12	2	0.0955957	0.995746	7.75018
CPS1	13	9	3	2	4	3	0.0971439	0.995746	0.96441
GAS2	13	9	0	1	8	8	0.0971439	0.995746	0
GIN1	13	9	0	0	9	6	0.0971439	0.995746	2.18616
HOXA10	13	9	2	4	3	2	0.0971439	0.995746	1.03133
MRPL34	13	9	6	3	0	1	0.0971439	0.995746	-0.693147
NKX2-2	13	9	3	3	3	1	0.0971439	0.995746	2.07944
RPP25	13	9	6	3	0	0	0.0971439	0.995746	0
AMMECR1	47	24	0	0	24	16	0.0976683	0.995746	3.36734
GSN	33	18	0	0	18	11	0.0983161	0.995746	3.59947
IFT172	33	18	4	4	10	9	0.0983161	0.995746	0.646333
ATP1A1	7	6	0	1	5	2	0.0984142	0.995746	2.89037
CCDC58	7	6	0	0	6	3	0.0984142	0.995746	2.69027
CHST3	7	6	0	1	5	3	0.0984142	0.995746	1.85904
EDARADD	7	6	0	1	5	3	0.0984142	0.995746	1.85904
EMID2	7	6	1	0	5	3	0.0984142	0.995746	1.85904
FAM119A	7	6	0	0	6	2	0.0984142	0.995746	3.7216
FAM119B	7	6	3	1	2	1	0.0984142	0.995746	1.04811
GCHFR	7	6	0	0	6	4	0.0984142	0.995746	1.72586
GLCCI1	7	6	0	0	6	4	0.0984142	0.995746	1.72586
HIST1H2BD	7	6	0	4	2	5	0.0984142	0.995746	-2.89037
HOXA7	7	6	1	2	3	2	0.0984142	0.995746	1.03133
HUS1B	7	6	4	2	0	0	0.0984142	0.995746	0
LOC100128239	7	6	0	0	6	2	0.0984142	0.995746	3.7216
PIP5K1A	7	6	2	1	3	1	0.0984142	0.995746	2.07944
PYGO2	7	6	1	0	5	1	0.0984142	0.995746	3.93848
SEPT11	7	6	0	1	5	4	0.0984142	0.995746	0.894632
SLC35A3	7	6	0	0	6	3	0.0984142	0.995746	2.69027
TM2D1	7	6	1	0	5	2	0.0984142	0.995746	2.89037
TMED2	7	6	1	0	5	5	0.0984142	0.995746	0
TRIM38	7	6	0	3	3	4	0.0984142	0.995746	-0.96441
TXLNA	7	6	1	1	4	4	0.0984142	0.995746	0
UCKL1AS	7	6	3	3	0	0	0.0984142	0.995746	0
USP22	7	6	1	0	5	3	0.0984142	0.995746	1.85904
ZDHHC24	7	6	0	0	6	3	0.0984142	0.995746	2.69027
ATP2A1	11	8	0	0	8	1	0.0989439	0.995746	6.27189
C3orf21	11	8	0	0	8	4	0.0989439	0.995746	3.22804
CCDC7	11	8	2	2	4	2	0.0989439	0.995746	1.99574
CLU	11	8	1	0	7	3	0.0989439	0.995746	3.46574
CN5H6.4	11	8	2	6	0	0	0.0989439	0.995746	0
CTNND1	11	8	1	0	7	2	0.0989439	0.995746	4.49707
EME1	11	8	0	0	8	3	0.0989439	0.995746	4.19245
LOC375190	11	8	1	1	6	1	0.0989439	0.995746	4.76971
LRRC34	11	8	0	2	6	1	0.0989439	0.995746	4.76971
MTMR12	11	8	0	0	8	7	0.0989439	0.995746	0.726712
NR2E1	11	8	0	2	6	8	0.0989439	0.995746	-1.50218
USP49	11	8	0	0	8	5	0.0989439	0.995746	2.33341
ZNF114	11	8	2	1	5	4	0.0989439	0.995746	0.894632
DCAF4L1	9	7	3	4	0	0	0.0996284	0.995746	0
MEG8	9	7	0	0	7	4	0.0996284	0.995746	2.50133
PAX6	9	7	2	0	5	0	0.0996284	0.995746	4.63163
PMM2	9	7	0	0	7	4	0.0996284	0.995746	2.50133
PRSS30P	9	7	5	2	0	0	0.0996284	0.995746	0
SCAND1	9	7	3	4	0	0	0.0996284	0.995746	0
TJP2	9	7	0	0	7	3	0.0996284	0.995746	3.46574
TMED10	9	7	0	1	6	1	0.0996284	0.995746	4.76971
C3orf26	24	14	0	0	14	13	0.100031	0.995746	0.532228
CCDC132	24	14	0	0	14	8	0.100031	0.995746	3.61502
GDF11	24	14	0	0	14	11	0.100031	0.995746	1.67176
NBR1	24	14	6	7	1	3	0.100031	0.995746	-2.07944
STAM	24	14	0	1	13	5	0.100031	0.995746	5.4162
C9orf85	31	17	0	0	17	3	0.103265	0.995746	9.28004
CSMD3	79	37	1	0	36	23	0.103368	0.995746	4.23965
NKAIN3	89	41	0	0	41	33	0.104378	0.995746	2.21447
NCKAP5	94	43	0	0	43	26	0.104605	0.995746	4.98819
C1orf228	22	13	1	0	12	10	0.104625	0.995746	1.19609
CDKN2C	22	13	3	2	8	2	0.104625	0.995746	5.22378
NHSL2	22	13	0	0	13	4	0.104625	0.995746	6.31083
GLIS3	99	45	0	1	44	36	0.104682	0.995746	2.09472
DNAJC27	43	22	8	11	3	3	0.108045	0.995746	0
CPA6	77	36	0	0	36	26	0.108407	0.995746	3.13957
BST2	29	16	4	3	9	13	0.108493	0.995746	-2.39881
MIR548C	29	16	0	0	16	4	0.108493	0.995746	7.84366
GPR125	36	19	0	1	18	7	0.109166	0.995746	6.26944
C11orf20	20	12	5	5	2	1	0.109358	0.995746	1.04811
CCDC77	20	12	0	0	12	11	0.109358	0.995746	0.583143
CRYM	20	12	0	0	12	5	0.109358	0.995746	4.85981
HTT	20	12	0	0	12	4	0.109358	0.995746	5.75444
DDB2	48	24	0	0	24	9	0.111383	0.995746	7.29897
NLRC5	27	15	4	7	4	3	0.114016	0.995746	0.96441
ARID4A	18	11	0	0	11	6	0.114192	0.995746	3.44544
CENPP	18	11	0	0	11	13	0.114192	0.995746	-1.13953
CNST	18	11	0	1	10	6	0.114192	0.995746	2.83249
GPX8	18	11	1	1	9	0	0.114192	0.995746	7.64902
OGFOD2	18	11	3	4	4	1	0.114192	0.995746	3.04385
SEMA4A	18	11	1	2	8	3	0.114192	0.995746	4.19245
TBC1D2B	18	11	0	0	11	5	0.114192	0.995746	4.27667
THAP4	18	11	0	0	11	9	0.114192	0.995746	1.25928
USP10	18	11	0	0	11	8	0.114192	0.995746	1.94326
ZMIZ1	18	11	0	0	11	9	0.114192	0.995746	1.25928
SKAP1	80	37	0	0	37	21	0.114254	0.995746	5.3055
RYR2	85	39	4	3	32	32	0.114562	0.995746	0
PDK3	34	18	5	10	3	11	0.114895	0.995746	-6.13571
SESTD1	34	18	0	1	17	8	0.114895	0.995746	5.0876
SIK3	34	18	0	0	18	5	0.114895	0.995746	7.87613
MARCH1	123	54	0	0	54	55	0.116895	0.995746	-0.208811
ACCN2	2	3	0	0	3	2	0.117354	0.995746	1.03133
ACD	2	3	0	2	1	1	0.117354	0.995746	0
ACOX3	2	3	0	0	3	1	0.117354	0.995746	2.07944
ADAMTS18	2	3	0	1	2	1	0.117354	0.995746	1.04811
ARHGEF17	2	3	0	3	0	1	0.117354	0.995746	-0.693147
ATP6V0E2	2	3	1	1	1	0	0.117354	0.995746	0.693147
AZIN1	2	3	3	0	0	2	0.117354	0.995746	-1.74126
B9D2	2	3	2	0	1	2	0.117354	0.995746	-1.04811
BEX4	2	3	1	1	1	2	0.117354	0.995746	-1.04811
BRP44	2	3	0	0	3	0	0.117354	0.995746	2.77259
C5orf51	2	3	1	0	2	0	0.117354	0.995746	1.74126
CAPRIN2	2	3	1	2	0	1	0.117354	0.995746	-0.693147
CARD9	2	3	3	0	0	0	0.117354	0.995746	0
CDH3	2	3	0	0	3	0	0.117354	0.995746	2.77259
CEMP1	2	3	2	1	0	0	0.117354	0.995746	0
CMC1	2	3	0	0	3	2	0.117354	0.995746	1.03133
CSRNP2	2	3	0	2	1	0	0.117354	0.995746	0.693147
CTH	2	3	0	0	3	1	0.117354	0.995746	2.07944
D4S234E	2	3	3	0	0	1	0.117354	0.995746	-0.693147
DECR2	2	3	0	0	3	2	0.117354	0.995746	1.03133
DNAH12	2	3	0	0	3	1	0.117354	0.995746	2.07944
DOM3Z	2	3	1	1	1	0	0.117354	0.995746	0.693147
EID1	2	3	0	3	0	0	0.117354	0.995746	0
FBXO8	2	3	0	0	3	1	0.117354	0.995746	2.07944
FKBP7	2	3	0	0	3	2	0.117354	0.995746	1.03133
FMNL1	2	3	2	0	1	0	0.117354	0.995746	0.693147
FNBP1L	2	3	0	0	3	1	0.117354	0.995746	2.07944
GALNT9	2	3	0	0	3	1	0.117354	0.995746	2.07944
HEATR5A	2	3	0	0	3	4	0.117354	0.995746	-0.96441
HK2	2	3	0	0	3	2	0.117354	0.995746	1.03133
HOXB13	2	3	0	3	0	1	0.117354	0.995746	-0.693147
IL28RA	2	3	1	0	2	1	0.117354	0.995746	1.04811
KCNH2	2	3	0	0	3	2	0.117354	0.995746	1.03133
KIAA0556	2	3	0	0	3	1	0.117354	0.995746	2.07944
LMF2	2	3	1	0	2	2	0.117354	0.995746	0
LOC283663	2	3	1	2	0	0	0.117354	0.995746	0
LOC729991-MEF2B	2	3	0	2	1	2	0.117354	0.995746	-1.04811
METTL6	2	3	0	0	3	2	0.117354	0.995746	1.03133
MOGS	2	3	0	2	1	0	0.117354	0.995746	0.693147
MTERF	2	3	0	0	3	1	0.117354	0.995746	2.07944
MTSS1L	2	3	0	0	3	1	0.117354	0.995746	2.07944
MYO6	2	3	1	0	2	0	0.117354	0.995746	1.74126
NAPA	2	3	0	1	2	1	0.117354	0.995746	1.04811
NARF	2	3	0	3	0	0	0.117354	0.995746	0
NCRNA00173	2	3	1	2	0	0	0.117354	0.995746	0
NCRNA00235	2	3	1	2	0	0	0.117354	0.995746	0
NPRL2	2	3	0	1	2	0	0.117354	0.995746	1.74126
OBSL1	2	3	0	2	1	0	0.117354	0.995746	0.693147
ORMDL2	2	3	0	0	3	0	0.117354	0.995746	2.77259
PCDHGA2	2	3	0	0	3	0	0.117354	0.995746	2.77259
PCDHGA3	2	3	0	0	3	0	0.117354	0.995746	2.77259
PCDHGA4	2	3	0	0	3	0	0.117354	0.995746	2.77259
PCDHGB1	2	3	0	0	3	0	0.117354	0.995746	2.77259
PCDHGB2	2	3	0	0	3	0	0.117354	0.995746	2.77259
PDCD10	2	3	0	0	3	2	0.117354	0.995746	1.03133
PDCD5	2	3	0	0	3	4	0.117354	0.995746	-0.96441
PHPT1	2	3	1	1	1	0	0.117354	0.995746	0.693147
PIM3	2	3	1	2	0	0	0.117354	0.995746	0
PITPNM2	2	3	1	0	2	0	0.117354	0.995746	1.74126
PLA2R1	2	3	0	0	3	0	0.117354	0.995746	2.77259
PRRG4	2	3	0	0	3	1	0.117354	0.995746	2.07944
RAB8A	2	3	0	1	2	2	0.117354	0.995746	0
RGAG1	2	3	0	0	3	1	0.117354	0.995746	2.07944
RGMB	2	3	0	0	3	1	0.117354	0.995746	2.07944
RIC8A	2	3	1	1	1	1	0.117354	0.995746	0
RNF7	2	3	0	0	3	1	0.117354	0.995746	2.07944
RYK	2	3	0	0	3	1	0.117354	0.995746	2.07944
SAT2	2	3	1	1	1	1	0.117354	0.995746	0
SC4MOL	2	3	0	0	3	3	0.117354	0.995746	0
SH2D6	2	3	1	2	0	0	0.117354	0.995746	0
SLC27A4	2	3	1	1	1	0	0.117354	0.995746	0.693147
SLC27A5	2	3	0	0	3	1	0.117354	0.995746	2.07944
SLC2A10	2	3	0	0	3	0	0.117354	0.995746	2.77259
SLC34A1	2	3	0	0	3	0	0.117354	0.995746	2.77259
SOCS1	2	3	3	0	0	0	0.117354	0.995746	0
ST20	2	3	0	2	1	2	0.117354	0.995746	-1.04811
STK17B	2	3	1	0	2	1	0.117354	0.995746	1.04811
STX1A	2	3	1	0	2	0	0.117354	0.995746	1.74126
TMEM160	2	3	1	0	2	0	0.117354	0.995746	1.74126
TRA2A	2	3	0	1	2	1	0.117354	0.995746	1.04811
TRIM25	2	3	0	1	2	0	0.117354	0.995746	1.74126
TSPAN16	2	3	0	0	3	0	0.117354	0.995746	2.77259
ZFP36L2	2	3	1	2	0	0	0.117354	0.995746	0
ZIC3	2	3	0	1	2	0	0.117354	0.995746	1.74126
ZNF182	2	3	2	0	1	0	0.117354	0.995746	0.693147
ZNF438	2	3	0	0	3	0	0.117354	0.995746	2.77259
ZNF696	2	3	0	0	3	2	0.117354	0.995746	1.03133
ZXDB	2	3	3	0	0	0	0.117354	0.995746	0
SUPT3H	63	30	1	0	29	35	0.117469	0.995746	-1.83722
AHSA2	16	10	8	1	1	2	0.119065	0.995746	-1.04811
BDH1	16	10	2	1	7	4	0.119065	0.995746	2.50133
C9orf43	16	10	3	5	2	3	0.119065	0.995746	-1.03133
EHMT1	16	10	0	0	10	5	0.119065	0.995746	3.66372
ITGB1	16	10	1	1	8	3	0.119065	0.995746	4.19245
KIAA0247	16	10	3	5	2	3	0.119065	0.995746	-1.03133
NME1-NME2	16	10	1	0	9	8	0.119065	0.995746	0.683985
RLIM	16	10	1	0	9	5	0.119065	0.995746	3.01739
TMEM107	16	10	2	2	6	3	0.119065	0.995746	2.69027
MICALCL	78	36	1	1	34	26	0.119811	0.995746	2.56505
ACOX1	25	14	6	3	5	5	0.119851	0.995746	0
C11orf48	25	14	2	1	11	8	0.119851	0.995746	1.94326
C20orf117	25	14	1	0	13	8	0.119851	0.995746	3.08279
CYB5D2	25	14	4	2	8	8	0.119851	0.995746	0
MCC	56	27	1	4	22	19	0.121956	0.995746	1.23626
ANKFY1	14	9	1	0	8	3	0.123871	0.995746	4.19245
C1orf182	14	9	2	0	7	3	0.123871	0.995746	3.46574
CBFB	14	9	1	2	6	4	0.123871	0.995746	1.72586
CDCA7	14	9	0	0	9	2	0.123871	0.995746	5.90776
DNASE1L1	14	9	0	0	9	2	0.123871	0.995746	5.90776
FAM120A	14	9	1	0	8	2	0.123871	0.995746	5.22378
FAM177A1	14	9	2	0	7	9	0.123871	0.995746	-1.4107
MBNL3	14	9	1	1	7	8	0.123871	0.995746	-0.726712
PIP5K1B	14	9	0	0	9	5	0.123871	0.995746	3.01739
TRPV2	14	9	1	2	6	3	0.123871	0.995746	2.69027
MTMR3	165	70	1	0	69	43	0.125603	0.995746	5.38071
B4GALT6	23	13	0	0	13	6	0.126013	0.995746	4.58497
C5orf36	23	13	0	2	11	13	0.126013	0.995746	-1.13953
RUNX1T1	23	13	0	1	12	8	0.126013	0.995746	2.5264
C6orf211	37	19	0	0	19	18	0.126193	0.995746	0.439576
TIA1	49	24	1	2	21	14	0.126241	0.995746	3.20424
FAM96A	30	16	1	0	15	11	0.127472	0.995746	2.18206
MPDU1	30	16	2	3	11	4	0.127472	0.995746	5.1713
C21orf49	12	8	1	0	7	4	0.128436	0.995746	2.50133
COG8	12	8	1	2	5	5	0.128436	0.995746	0
FMN2	12	8	3	0	5	4	0.128436	0.995746	0.894632
KIAA1377	12	8	0	0	8	8	0.128436	0.995746	0
MDM2	12	8	5	1	2	3	0.128436	0.995746	-1.03133
MESDC2	12	8	1	2	5	1	0.128436	0.995746	3.93848
MS4A3	12	8	1	3	4	3	0.128436	0.995746	0.96441
NIPSNAP1	12	8	2	2	4	4	0.128436	0.995746	0
PCBP3	12	8	0	0	8	3	0.128436	0.995746	4.19245
PTCH2	12	8	6	1	1	2	0.128436	0.995746	-1.04811
LECT1	59	28	1	0	27	30	0.129807	0.995746	-0.993557
SPTBN1	59	28	1	3	24	25	0.129807	0.995746	-0.36649
MYO3B	104	46	2	1	43	35	0.129819	0.995746	2.133
MID1	64	30	0	0	30	21	0.130843	0.995746	3.22835
AP3M1	4	4	0	2	2	2	0.132126	0.995746	0
ARAP2	4	4	0	0	4	2	0.132126	0.995746	1.99574
ARHGAP32	4	4	0	0	4	5	0.132126	0.995746	-0.894632
BCKDHB	4	4	0	0	4	0	0.132126	0.995746	3.737
C16orf68	4	4	0	0	4	2	0.132126	0.995746	1.99574
C1orf86	4	4	0	1	3	4	0.132126	0.995746	-0.96441
C4orf33	4	4	1	0	3	3	0.132126	0.995746	0
CMTM8	4	4	0	0	4	1	0.132126	0.995746	3.04385
COL9A3	4	4	0	0	4	6	0.132126	0.995746	-1.72586
CUTC	4	4	0	0	4	2	0.132126	0.995746	1.99574
DUS1L	4	4	1	2	1	1	0.132126	0.995746	0
FAM107B	4	4	0	0	4	2	0.132126	0.995746	1.99574
FIBP	4	4	1	0	3	4	0.132126	0.995746	-0.96441
FZD2	4	4	0	4	0	0	0.132126	0.995746	0
GLDC	4	4	0	0	4	2	0.132126	0.995746	1.99574
HGSNAT	4	4	0	0	4	1	0.132126	0.995746	3.04385
HUNK	4	4	1	0	3	1	0.132126	0.995746	2.07944
ITGA2B	4	4	1	0	3	1	0.132126	0.995746	2.07944
ITPRIPL2	4	4	4	0	0	0	0.132126	0.995746	0
JRKL	4	4	2	2	0	0	0.132126	0.995746	0
KIAA1522	4	4	0	1	3	2	0.132126	0.995746	1.03133
KIAA2018	4	4	0	0	4	1	0.132126	0.995746	3.04385
KIF16B	4	4	0	0	4	1	0.132126	0.995746	3.04385
LRRC23	4	4	4	0	0	1	0.132126	0.995746	-0.693147
MAP4K1	4	4	0	0	4	0	0.132126	0.995746	3.737
MAVS	4	4	0	0	4	2	0.132126	0.995746	1.99574
MNX1	4	4	1	1	2	0	0.132126	0.995746	1.74126
MYOT	4	4	1	1	2	3	0.132126	0.995746	-1.03133
NCEH1	4	4	0	0	4	2	0.132126	0.995746	1.99574
NPAS2	4	4	0	0	4	3	0.132126	0.995746	0.96441
PCBP1	4	4	1	3	0	0	0.132126	0.995746	0
PLXNB1	4	4	1	0	3	3	0.132126	0.995746	0
PPM1F	4	4	0	0	4	3	0.132126	0.995746	0.96441
PRDX6	4	4	0	0	4	0	0.132126	0.995746	3.737
PVRL1	4	4	0	0	4	4	0.132126	0.995746	0
RALGPS2	4	4	0	0	4	1	0.132126	0.995746	3.04385
RORC	4	4	0	0	4	4	0.132126	0.995746	0
SELV	4	4	2	1	1	2	0.132126	0.995746	-1.04811
SIX4	4	4	1	2	1	2	0.132126	0.995746	-1.04811
SLC35F5	4	4	1	1	2	3	0.132126	0.995746	-1.03133
SLC39A8	4	4	0	2	2	0	0.132126	0.995746	1.74126
SPTLC1	4	4	0	0	4	4	0.132126	0.995746	0
SYNM	4	4	0	1	3	2	0.132126	0.995746	1.03133
TBC1D7	4	4	2	0	2	0	0.132126	0.995746	1.74126
TDG	4	4	0	0	4	2	0.132126	0.995746	1.99574
TMEM223	4	4	1	2	1	2	0.132126	0.995746	-1.04811
TRMT61B	4	4	0	3	1	0	0.132126	0.995746	0.693147
UBE3A	4	4	0	0	4	5	0.132126	0.995746	-0.894632
UBL4A	4	4	2	2	0	0	0.132126	0.995746	0
VAV3	4	4	0	0	4	4	0.132126	0.995746	0
ZNF34	4	4	0	0	4	0	0.132126	0.995746	3.737
ZNF382	4	4	0	0	4	1	0.132126	0.995746	3.04385
ZNF7	4	4	0	0	4	2	0.132126	0.995746	1.99574
ZNF766	4	4	0	0	4	1	0.132126	0.995746	3.04385
AGAP1	10	7	0	0	7	7	0.132449	0.995746	0
ASS1	10	7	1	0	6	6	0.132449	0.995746	0
BICC1	10	7	0	0	7	7	0.132449	0.995746	0
C17orf89	10	7	0	0	7	5	0.132449	0.995746	1.60669
CLOCK	10	7	1	0	6	2	0.132449	0.995746	3.7216
CYBASC3	10	7	2	0	5	1	0.132449	0.995746	3.93848
GIPR	10	7	0	1	6	3	0.132449	0.995746	2.69027
HPRT1	10	7	0	0	7	2	0.132449	0.995746	4.49707
LOC145783	10	7	3	2	2	3	0.132449	0.995746	-1.03133
LOC401093	10	7	2	4	1	0	0.132449	0.995746	0.693147
MKNK2	10	7	3	2	2	4	0.132449	0.995746	-1.99574
RFWD2	10	7	0	1	6	3	0.132449	0.995746	2.69027
RNF10	10	7	1	0	6	2	0.132449	0.995746	3.7216
TMEM129	10	7	2	2	3	2	0.132449	0.995746	1.03133
TRIOBP	10	7	1	0	6	6	0.132449	0.995746	0
ADCK4	21	12	1	3	8	6	0.132515	0.995746	1.50218
CDKN2A	21	12	1	0	11	6	0.132515	0.995746	3.44544
IGF2BP2	21	12	1	0	11	12	0.132515	0.995746	-0.583143
LZTS2	21	12	1	0	11	8	0.132515	0.995746	1.94326
ZNRF1	21	12	1	0	11	17	0.132515	0.995746	-3.14434
ATP5A1	47	23	0	0	23	11	0.132961	0.995746	5.66296
KNTC1	35	18	0	2	16	12	0.133055	0.995746	2.08921
SKAP2	35	18	0	0	18	11	0.133055	0.995746	3.59947
C5orf41	28	15	10	5	0	0	0.134387	0.995746	0
RALGAPA1	28	15	0	0	15	12	0.134387	0.995746	1.59891
RASGRF2	28	15	0	1	14	4	0.134387	0.995746	6.84306
TTC3	28	15	0	0	15	16	0.134387	0.995746	-0.490299
ZBTB38	28	15	0	0	15	6	0.134387	0.995746	5.62749
ZC3H6	28	15	2	3	10	6	0.134387	0.995746	2.83249
ACAD9	8	6	1	1	4	1	0.135351	0.995746	3.04385
ALS2	8	6	4	1	1	3	0.135351	0.995746	-2.07944
ANKRD26	8	6	1	1	4	0	0.135351	0.995746	3.737
BTLA	8	6	0	0	6	1	0.135351	0.995746	4.76971
BUB1B	8	6	0	1	5	7	0.135351	0.995746	-1.60669
C21orf67	8	6	2	2	2	2	0.135351	0.995746	0
CLCC1	8	6	0	0	6	3	0.135351	0.995746	2.69027
COPZ1	8	6	0	0	6	1	0.135351	0.995746	4.76971
CTPS	8	6	1	0	5	5	0.135351	0.995746	0
CUL7	8	6	1	0	5	4	0.135351	0.995746	0.894632
E2F3	8	6	2	1	3	2	0.135351	0.995746	1.03133
IQSEC2	8	6	1	1	4	3	0.135351	0.995746	0.96441
MFI2	8	6	0	1	5	0	0.135351	0.995746	4.63163
PARD6B	8	6	0	0	6	1	0.135351	0.995746	4.76971
PCYT1A	8	6	0	0	6	3	0.135351	0.995746	2.69027
PRDM10	8	6	0	0	6	4	0.135351	0.995746	1.72586
PYY	8	6	0	0	6	2	0.135351	0.995746	3.7216
TAPBP	8	6	2	1	3	0	0.135351	0.995746	2.77259
TNNI3K	8	6	0	0	6	2	0.135351	0.995746	3.7216
UCKL1	8	6	0	1	5	2	0.135351	0.995746	2.89037
AMZ2P1	6	5	4	1	0	0	0.136042	0.995746	0
C17orf81	6	5	2	2	1	1	0.136042	0.995746	0
CATSPERG	6	5	1	0	4	4	0.136042	0.995746	0
CHCHD6	6	5	0	0	5	2	0.136042	0.995746	2.89037
DDHD2	6	5	1	1	3	2	0.136042	0.995746	1.03133
DNM1P35	6	5	3	2	0	0	0.136042	0.995746	0
FAM117B	6	5	0	1	4	0	0.136042	0.995746	3.737
FAM65A	6	5	0	0	5	2	0.136042	0.995746	2.89037
FKRP	6	5	1	0	4	3	0.136042	0.995746	0.96441
GPATCH3	6	5	3	0	2	2	0.136042	0.995746	0
HCG18	6	5	1	1	3	3	0.136042	0.995746	0
HPCAL1	6	5	0	0	5	4	0.136042	0.995746	0.894632
IGFBP5	6	5	0	3	2	4	0.136042	0.995746	-1.99574
KHK	6	5	0	2	3	3	0.136042	0.995746	0
LETM2	6	5	0	0	5	2	0.136042	0.995746	2.89037
LINGO1	6	5	0	0	5	1	0.136042	0.995746	3.93848
LOC641518	6	5	0	0	5	1	0.136042	0.995746	3.93848
MAP2K6	6	5	0	0	5	2	0.136042	0.995746	2.89037
MCM3APAS	6	5	0	0	5	7	0.136042	0.995746	-1.60669
NMNAT3	6	5	0	0	5	4	0.136042	0.995746	0.894632
PGRMC2	6	5	3	2	0	0	0.136042	0.995746	0
PKP4	6	5	0	0	5	1	0.136042	0.995746	3.93848
PRDM1	6	5	0	0	5	3	0.136042	0.995746	1.85904
PRIM2	6	5	0	0	5	4	0.136042	0.995746	0.894632
SLC25A40	6	5	0	0	5	3	0.136042	0.995746	1.85904
SLC5A6	6	5	0	2	3	2	0.136042	0.995746	1.03133
SSH1	6	5	0	0	5	1	0.136042	0.995746	3.93848
STT3A	6	5	0	0	5	2	0.136042	0.995746	2.89037
SYN3	6	5	0	0	5	5	0.136042	0.995746	0
THAP11	6	5	2	3	0	0	0.136042	0.995746	0
TMCC3	6	5	0	0	5	6	0.136042	0.995746	-0.831229
UROC1	6	5	0	0	5	2	0.136042	0.995746	2.89037
USP21	6	5	1	1	3	1	0.136042	0.995746	2.07944
VWCE	6	5	1	0	4	2	0.136042	0.995746	1.99574
ZNF621	6	5	2	0	3	2	0.136042	0.995746	1.03133
ZNF652	6	5	0	0	5	4	0.136042	0.995746	0.894632
C6orf106	57	27	0	0	27	24	0.136538	0.995746	1.07109
FBXW7	57	27	0	0	27	19	0.136538	0.995746	3.07175
KCNK2	62	29	0	0	29	27	0.137524	0.995746	0.670214
C16orf86	19	11	3	5	3	7	0.139365	0.995746	-3.46574
CHRAC1	19	11	2	1	8	8	0.139365	0.995746	0
GALNT10	19	11	0	0	11	8	0.139365	0.995746	1.94326
HDAC8	19	11	0	0	11	5	0.139365	0.995746	4.27667
SETDB1	19	11	1	1	9	6	0.139365	0.995746	2.18616
URGCP	19	11	2	3	6	8	0.139365	0.995746	-1.50218
YPEL3	19	11	4	4	3	3	0.139365	0.995746	0
THAP6	45	22	8	4	10	4	0.140119	0.995746	4.55836
HPS4	33	17	2	1	14	12	0.140388	0.995746	1.08862
PPP3CC	105	46	5	5	36	32	0.140856	0.995746	1.17315
ASAP2	26	14	1	1	12	12	0.14177	0.995746	0
SFMBT2	26	14	0	2	12	5	0.14177	0.995746	4.85981
UBR2	26	14	0	1	13	13	0.14177	0.995746	0
MLLT10	50	24	2	2	20	15	0.142234	0.995746	2.28215
PER3	38	19	2	3	14	16	0.144693	0.995746	-1.0006
FGFR2	70	32	2	0	30	34	0.145263	0.995746	-1.22374
ABL1	17	10	0	3	7	7	0.146562	0.995746	0
ASXL3	17	10	1	1	8	12	0.146562	0.995746	-2.5264
C8orf55	17	10	2	0	8	5	0.146562	0.995746	2.33341
CSNK1D	17	10	0	0	10	5	0.146562	0.995746	3.66372
DRD3	31	16	0	0	16	10	0.148237	0.995746	3.2853
FILIP1	31	16	0	0	16	6	0.148237	0.995746	6.11779
ANKRD34A	24	13	3	6	4	3	0.149666	0.995746	0.96441
EXT1	24	13	2	3	8	7	0.149666	0.995746	0.726712
LOXL3	24	13	0	2	11	6	0.149666	0.995746	3.44544
RNF168	24	13	3	2	8	5	0.149666	0.995746	2.33341
SLC38A11	48	23	1	5	17	13	0.149872	0.995746	2.00481
TMC1	326	130	0	0	130	139	0.151019	0.995746	-0.941042
NUBPL	53	25	1	0	24	8	0.151272	0.995746	7.98296
UNC13C	73	33	0	0	33	28	0.152294	0.995746	1.58197
GALNT2	36	18	0	0	18	21	0.152768	0.995746	-1.27653
AP4M1	15	9	1	3	5	2	0.154087	0.995746	2.89037
C14orf126	15	9	1	0	8	5	0.154087	0.995746	2.33341
C2orf63	15	9	1	1	7	2	0.154087	0.995746	4.49707
CNOT1	15	9	1	0	8	6	0.154087	0.995746	1.50218
DCLRE1A	15	9	7	2	0	1	0.154087	0.995746	-0.693147
RASSF8	15	9	0	0	9	2	0.154087	0.995746	5.90776
SFRS1	15	9	4	2	3	9	0.154087	0.995746	-4.87643
NF1	263	106	1	5	100	97	0.155658	0.995746	0.400219
EYA3	41	20	0	0	20	17	0.155905	0.995746	1.31988
GABRB1	29	15	0	0	15	15	0.156658	0.995746	0
SCUBE2	29	15	1	0	14	12	0.156658	0.995746	1.08862
FLJ43663	140	59	0	0	59	40	0.158086	0.995746	4.28919
PLXDC2	140	59	0	2	57	42	0.158086	0.995746	3.37673
LRRC14	22	12	10	2	0	1	0.158125	0.995746	-0.693147
MAZ	22	12	5	5	2	1	0.158125	0.995746	1.04811
VPS13B	22	12	1	2	9	10	0.158125	0.995746	-0.646333
DIS3L	76	34	4	4	26	30	0.159205	0.995746	-1.34131
PCDHAC2	76	34	0	4	30	16	0.159205	0.995746	5.43199
GCOM1	61	28	1	0	27	18	0.16034	0.995746	3.51133
UGT1A9	61	28	0	0	28	20	0.16034	0.995746	2.98575
GPR112	99	43	0	2	41	24	0.16074	0.995746	5.2067
CTDSPL2	34	17	1	0	16	6	0.161424	0.995746	6.11779
ACTA2	13	8	0	0	8	6	0.161888	0.995746	1.50218
AGTR1	13	8	2	5	1	2	0.161888	0.995746	-1.04811
C6orf97	13	8	1	0	7	2	0.161888	0.995746	4.49707
CALD1	13	8	0	0	8	10	0.161888	0.995746	-1.33032
DNAJB13	13	8	0	0	8	0	0.161888	0.995746	6.96504
ICA1L	13	8	1	1	6	2	0.161888	0.995746	3.7216
ITGB8	13	8	0	0	8	6	0.161888	0.995746	1.50218
NBL1	13	8	0	0	8	3	0.161888	0.995746	4.19245
LOC100131691	39	19	3	4	12	7	0.164629	0.995746	3.25312
LPIN2	39	19	8	4	7	13	0.164629	0.995746	-3.8095
OFD1	39	19	1	2	16	12	0.164629	0.995746	2.08921
RBM47	39	19	1	1	17	11	0.164629	0.995746	3.14434
ANP32E	27	14	2	4	8	10	0.165712	0.995746	-1.33032
CPEB3	27	14	1	0	13	9	0.165712	0.995746	2.39881
CCND3	79	35	0	0	35	28	0.165994	0.995746	2.16827
BCL2L13	20	11	0	0	11	6	0.167205	0.995746	3.44544
CDC14A	20	11	0	1	10	7	0.167205	0.995746	2.05703
SLC37A3	20	11	0	0	11	9	0.167205	0.995746	1.25928
ADAM22	11	7	0	0	7	5	0.169847	0.995746	1.60669
BAG4	11	7	1	0	6	5	0.169847	0.995746	0.831229
C7orf40	11	7	2	1	4	5	0.169847	0.995746	-0.894632
CACNA1D	11	7	0	0	7	1	0.169847	0.995746	5.54518
FAM49B	11	7	0	0	7	6	0.169847	0.995746	0.775464
HELLS	11	7	1	0	6	6	0.169847	0.995746	0
INPP4B	11	7	0	0	7	5	0.169847	0.995746	1.60669
ITM2A	11	7	0	0	7	8	0.169847	0.995746	-0.726712
LRP8	11	7	1	0	6	3	0.169847	0.995746	2.69027
MANBAL	11	7	0	0	7	3	0.169847	0.995746	3.46574
MIDN	11	7	0	3	4	3	0.169847	0.995746	0.96441
NDUFA7	11	7	0	0	7	2	0.169847	0.995746	4.49707
PELI2	11	7	0	0	7	5	0.169847	0.995746	1.60669
SMAD5	11	7	1	0	6	9	0.169847	0.995746	-2.18616
USP28	11	7	0	0	7	3	0.169847	0.995746	3.46574
WDR34	11	7	0	0	7	3	0.169847	0.995746	3.46574
FEZ2	32	16	1	2	13	18	0.170723	0.995746	-2.45994
ABCB4	1	2	0	0	2	0	0.170767	0.995746	1.74126
ABCF2	1	2	0	0	2	1	0.170767	0.995746	1.04811
AFAP1L1	1	2	0	0	2	2	0.170767	0.995746	0
AKD1	1	2	0	0	2	2	0.170767	0.995746	0
ALDH5A1	1	2	0	0	2	1	0.170767	0.995746	1.04811
ANKRD13D	1	2	0	1	1	2	0.170767	0.995746	-1.04811
ANKRD57	1	2	2	0	0	0	0.170767	0.995746	0
APEH	1	2	0	1	1	1	0.170767	0.995746	0
ARL4A	1	2	1	1	0	0	0.170767	0.995746	0
ASTE1	1	2	0	0	2	1	0.170767	0.995746	1.04811
ATG4D	1	2	1	0	1	0	0.170767	0.995746	0.693147
ATG9A	1	2	0	0	2	3	0.170767	0.995746	-1.03133
ATOH1	1	2	1	1	0	0	0.170767	0.995746	0
ATP2A3	1	2	1	0	1	2	0.170767	0.995746	-1.04811
ATP2C2	1	2	0	0	2	0	0.170767	0.995746	1.74126
B4GALNT1	1	2	0	1	1	0	0.170767	0.995746	0.693147
BMP8B	1	2	1	0	1	0	0.170767	0.995746	0.693147
C10orf118	1	2	0	0	2	0	0.170767	0.995746	1.74126
C16orf70	1	2	0	0	2	1	0.170767	0.995746	1.04811
C19orf10	1	2	0	1	1	0	0.170767	0.995746	0.693147
C19orf56	1	2	0	1	1	3	0.170767	0.995746	-2.07944
C1orf103	1	2	0	2	0	2	0.170767	0.995746	-1.74126
C1orf112	1	2	0	1	1	0	0.170767	0.995746	0.693147
C2orf71	1	2	1	0	1	1	0.170767	0.995746	0
C9orf30	1	2	0	0	2	0	0.170767	0.995746	1.74126
C9orf44	1	2	0	0	2	0	0.170767	0.995746	1.74126
CA7	1	2	0	0	2	1	0.170767	0.995746	1.04811
CABLES2	1	2	0	0	2	0	0.170767	0.995746	1.74126
CD302	1	2	0	0	2	0	0.170767	0.995746	1.74126
CD46	1	2	0	0	2	0	0.170767	0.995746	1.74126
CDK5R1	1	2	2	0	0	0	0.170767	0.995746	0
CENPE	1	2	0	0	2	2	0.170767	0.995746	0
CIB2	1	2	0	0	2	1	0.170767	0.995746	1.04811
CLCN4	1	2	1	0	1	1	0.170767	0.995746	0
CMAS	1	2	0	0	2	1	0.170767	0.995746	1.04811
CNNM3	1	2	1	1	0	0	0.170767	0.995746	0
COCH	1	2	1	0	1	0	0.170767	0.995746	0.693147
COL17A1	1	2	0	0	2	0	0.170767	0.995746	1.74126
COL4A4	1	2	0	0	2	1	0.170767	0.995746	1.04811
COX11	1	2	0	0	2	0	0.170767	0.995746	1.74126
CTSL1	1	2	0	0	2	0	0.170767	0.995746	1.74126
CXCL16	1	2	1	0	1	1	0.170767	0.995746	0
DAP	1	2	0	0	2	0	0.170767	0.995746	1.74126
DCLRE1C	1	2	1	0	1	0	0.170767	0.995746	0.693147
DCXR	1	2	0	1	1	0	0.170767	0.995746	0.693147
DNAJB7	1	2	0	2	0	0	0.170767	0.995746	0
EAF1	1	2	1	1	0	1	0.170767	0.995746	-0.693147
EEPD1	1	2	1	0	1	3	0.170767	0.995746	-2.07944
EXOC3L2	1	2	0	0	2	1	0.170767	0.995746	1.04811
FAM115A	1	2	0	0	2	0	0.170767	0.995746	1.74126
FAM128B	1	2	0	0	2	0	0.170767	0.995746	1.74126
FAM171A2	1	2	0	0	2	1	0.170767	0.995746	1.04811
FBP2	1	2	0	0	2	0	0.170767	0.995746	1.74126
FBXW5	1	2	1	1	0	0	0.170767	0.995746	0
FBXW9	1	2	0	0	2	1	0.170767	0.995746	1.04811
FHDC1	1	2	0	1	1	0	0.170767	0.995746	0.693147
FHL3	1	2	0	0	2	1	0.170767	0.995746	1.04811
FIGF	1	2	0	0	2	0	0.170767	0.995746	1.74126
FMO2	1	2	1	1	0	0	0.170767	0.995746	0
FNDC5	1	2	0	0	2	0	0.170767	0.995746	1.74126
FOXD3	1	2	1	1	0	0	0.170767	0.995746	0
FRMPD1	1	2	0	0	2	0	0.170767	0.995746	1.74126
FRZB	1	2	1	0	1	1	0.170767	0.995746	0
FUS	1	2	0	0	2	3	0.170767	0.995746	-1.03133
GABRR2	1	2	0	0	2	1	0.170767	0.995746	1.04811
GALK1	1	2	1	0	1	3	0.170767	0.995746	-2.07944
GALNT6	1	2	0	0	2	0	0.170767	0.995746	1.74126
GAS5	1	2	0	1	1	3	0.170767	0.995746	-2.07944
GBGT1	1	2	0	0	2	0	0.170767	0.995746	1.74126
GIF	1	2	0	1	1	2	0.170767	0.995746	-1.04811
GJA9	1	2	0	2	0	0	0.170767	0.995746	0
GLIS1	1	2	0	0	2	0	0.170767	0.995746	1.74126
GPAM	1	2	1	0	1	1	0.170767	0.995746	0
GPR180	1	2	0	0	2	3	0.170767	0.995746	-1.03133
GRIA1	1	2	0	0	2	0	0.170767	0.995746	1.74126
H1F0	1	2	2	0	0	0	0.170767	0.995746	0
HCFC1R1	1	2	2	0	0	0	0.170767	0.995746	0
HGF	1	2	1	0	1	0	0.170767	0.995746	0.693147
HNRNPH2	1	2	0	0	2	0	0.170767	0.995746	1.74126
HNRNPK	1	2	1	1	0	0	0.170767	0.995746	0
HRSP12	1	2	0	0	2	0	0.170767	0.995746	1.74126
HS3ST2	1	2	0	1	1	0	0.170767	0.995746	0.693147
HSP90B1	1	2	0	0	2	1	0.170767	0.995746	1.04811
IER5	1	2	1	1	0	0	0.170767	0.995746	0
IMP4	1	2	0	0	2	0	0.170767	0.995746	1.74126
IRAK2	1	2	0	0	2	0	0.170767	0.995746	1.74126
ISYNA1	1	2	1	0	1	1	0.170767	0.995746	0
JPH3	1	2	0	0	2	0	0.170767	0.995746	1.74126
KCND1	1	2	0	1	1	0	0.170767	0.995746	0.693147
KIAA1804	1	2	0	1	1	0	0.170767	0.995746	0.693147
KPNA4	1	2	0	0	2	1	0.170767	0.995746	1.04811
LOC284023	1	2	2	0	0	0	0.170767	0.995746	0
LOC284749	1	2	0	2	0	0	0.170767	0.995746	0
LOC285205	1	2	1	1	0	0	0.170767	0.995746	0
LOC389333	1	2	1	1	0	0	0.170767	0.995746	0
LOC415056	1	2	0	0	2	0	0.170767	0.995746	1.74126
LOC92659	1	2	0	1	1	2	0.170767	0.995746	-1.04811
LRRC56	1	2	1	1	0	0	0.170767	0.995746	0
LRRC8A	1	2	1	0	1	0	0.170767	0.995746	0.693147
LRSAM1	1	2	0	1	1	2	0.170767	0.995746	-1.04811
MAFF	1	2	0	0	2	0	0.170767	0.995746	1.74126
MARCH2	1	2	0	0	2	0	0.170767	0.995746	1.74126
MCHR1	1	2	1	0	1	0	0.170767	0.995746	0.693147
MEF2D	1	2	2	0	0	0	0.170767	0.995746	0
MFSD3	1	2	1	1	0	0	0.170767	0.995746	0
MGC16703	1	2	1	0	1	1	0.170767	0.995746	0
MIR591	1	2	1	1	0	0	0.170767	0.995746	0
MOBKL3	1	2	0	1	1	3	0.170767	0.995746	-2.07944
MPND	1	2	1	0	1	0	0.170767	0.995746	0.693147
MT1X	1	2	0	0	2	0	0.170767	0.995746	1.74126
NAT6	1	2	0	0	2	1	0.170767	0.995746	1.04811
NCRNA00085	1	2	0	0	2	0	0.170767	0.995746	1.74126
NDP	1	2	0	0	2	1	0.170767	0.995746	1.04811
NDUFB7	1	2	0	0	2	0	0.170767	0.995746	1.74126
NUMBL	1	2	0	0	2	0	0.170767	0.995746	1.74126
OMD	1	2	2	0	0	0	0.170767	0.995746	0
PCDHGA10	1	2	1	0	1	0	0.170767	0.995746	0.693147
PDZD7	1	2	0	0	2	1	0.170767	0.995746	1.04811
PJA1	1	2	1	0	1	1	0.170767	0.995746	0
POPDC3	1	2	0	0	2	0	0.170767	0.995746	1.74126
PPP1R3D	1	2	1	1	0	0	0.170767	0.995746	0
PPWD1	1	2	1	0	1	0	0.170767	0.995746	0.693147
PROS1	1	2	0	1	1	0	0.170767	0.995746	0.693147
PTDSS2	1	2	0	0	2	1	0.170767	0.995746	1.04811
PTPRZ1	1	2	0	0	2	2	0.170767	0.995746	0
RAB11FIP5	1	2	1	0	1	0	0.170767	0.995746	0.693147
RAB3D	1	2	0	1	1	1	0.170767	0.995746	0
RAB42	1	2	0	1	1	0	0.170767	0.995746	0.693147
REEP4	1	2	0	2	0	0	0.170767	0.995746	0
RMND5A	1	2	0	0	2	1	0.170767	0.995746	1.04811
ROCK1	1	2	1	1	0	3	0.170767	0.995746	-2.77259
RRP15	1	2	0	0	2	4	0.170767	0.995746	-1.99574
SAMD14	1	2	0	0	2	2	0.170767	0.995746	0
SAPS2	1	2	0	0	2	1	0.170767	0.995746	1.04811
SDHAF1	1	2	1	1	0	0	0.170767	0.995746	0
SEC16A	1	2	1	0	1	3	0.170767	0.995746	-2.07944
SEC61G	1	2	0	0	2	0	0.170767	0.995746	1.74126
SELS	1	2	0	0	2	1	0.170767	0.995746	1.04811
SERPINB1	1	2	0	0	2	0	0.170767	0.995746	1.74126
SFRS6	1	2	0	1	1	0	0.170767	0.995746	0.693147
SLC25A5	1	2	0	0	2	2	0.170767	0.995746	0
SLC45A2	1	2	0	0	2	2	0.170767	0.995746	0
SLC5A5	1	2	0	0	2	0	0.170767	0.995746	1.74126
SLC6A12	1	2	1	0	1	0	0.170767	0.995746	0.693147
SMOX	1	2	0	0	2	4	0.170767	0.995746	-1.99574
SNORD4A	1	2	0	2	0	0	0.170767	0.995746	0
SNX18	1	2	2	0	0	1	0.170767	0.995746	-0.693147
SPATA21	1	2	1	0	1	3	0.170767	0.995746	-2.07944
SPRY1	1	2	0	0	2	2	0.170767	0.995746	0
SPSB2	1	2	1	0	1	0	0.170767	0.995746	0.693147
SSR4	1	2	0	0	2	2	0.170767	0.995746	0
SV2C	1	2	1	0	1	0	0.170767	0.995746	0.693147
SVIP	1	2	0	0	2	2	0.170767	0.995746	0
SYBU	1	2	0	0	2	2	0.170767	0.995746	0
SYT5	1	2	2	0	0	0	0.170767	0.995746	0
TBC1D25	1	2	0	0	2	0	0.170767	0.995746	1.74126
TBC1D8B	1	2	1	0	1	1	0.170767	0.995746	0
TGFB3	1	2	0	1	1	1	0.170767	0.995746	0
THAP3	1	2	0	0	2	1	0.170767	0.995746	1.04811
TMC5	1	2	2	0	0	2	0.170767	0.995746	-1.74126
TMED3	1	2	0	0	2	1	0.170767	0.995746	1.04811
TMED7	1	2	0	0	2	0	0.170767	0.995746	1.74126
TMEM156	1	2	1	0	1	0	0.170767	0.995746	0.693147
TMEM232	1	2	1	0	1	1	0.170767	0.995746	0
TMEM63B	1	2	0	0	2	0	0.170767	0.995746	1.74126
TMPRSS9	1	2	0	0	2	1	0.170767	0.995746	1.04811
TRIM34	1	2	0	0	2	1	0.170767	0.995746	1.04811
TSEN34	1	2	1	1	0	0	0.170767	0.995746	0
TSHR	1	2	0	0	2	1	0.170767	0.995746	1.04811
TSN	1	2	0	1	1	1	0.170767	0.995746	0
TTC39B	1	2	0	0	2	1	0.170767	0.995746	1.04811
UAP1L1	1	2	0	1	1	0	0.170767	0.995746	0.693147
UBASH3B	1	2	0	1	1	0	0.170767	0.995746	0.693147
UBLCP1	1	2	0	0	2	0	0.170767	0.995746	1.74126
VRK3	1	2	0	0	2	1	0.170767	0.995746	1.04811
WBP1	1	2	0	0	2	1	0.170767	0.995746	1.04811
WNT10A	1	2	1	1	0	0	0.170767	0.995746	0
WTIP	1	2	1	0	1	0	0.170767	0.995746	0.693147
ZBTB3	1	2	2	0	0	0	0.170767	0.995746	0
ZDHHC18	1	2	0	0	2	3	0.170767	0.995746	-1.03133
ZNF16	1	2	0	0	2	0	0.170767	0.995746	1.74126
ZNF181	1	2	0	1	1	0	0.170767	0.995746	0.693147
ZNF235	1	2	0	0	2	0	0.170767	0.995746	1.74126
ZNF319	1	2	1	0	1	0	0.170767	0.995746	0.693147
ZNF45	1	2	0	0	2	1	0.170767	0.995746	1.04811
ZNF543	1	2	0	0	2	0	0.170767	0.995746	1.74126
ZNF552	1	2	0	0	2	0	0.170767	0.995746	1.74126
ZNF720	1	2	0	2	0	2	0.170767	0.995746	-1.74126
ZNF786	1	2	0	0	2	0	0.170767	0.995746	1.74126
ZSCAN22	1	2	0	0	2	0	0.170767	0.995746	1.74126
ENOX2	37	18	2	1	15	10	0.173979	0.995746	2.795
KAZALD1	37	18	4	9	5	7	0.173979	0.995746	-1.60669
MYBPC1	72	32	2	0	30	29	0.175212	0.995746	0.323343
NONO	25	13	4	0	9	5	0.175476	0.995746	3.01739
PAN2	25	13	4	7	2	3	0.175476	0.995746	-1.03133
PLEKHA5	25	13	1	1	11	10	0.175476	0.995746	0.612942
RNF207	25	13	3	1	9	6	0.175476	0.995746	2.18616
SEMA3D	25	13	5	5	3	3	0.175476	0.995746	0
TCTA	25	13	4	1	8	5	0.175476	0.995746	2.33341
AGBL3	18	10	0	0	10	10	0.176973	0.995746	0
ATL3	18	10	2	1	7	3	0.176973	0.995746	3.46574
HOXA11AS	18	10	2	1	7	9	0.176973	0.995746	-1.4107
IP6K1	18	10	4	2	4	2	0.176973	0.995746	1.99574
MIR548H2	18	10	0	0	10	9	0.176973	0.995746	0.646333
OLA1	18	10	0	0	10	2	0.176973	0.995746	6.5541
PDIK1L	18	10	3	3	4	3	0.176973	0.995746	0.96441
UGT1A10	62	28	0	0	28	20	0.176996	0.995746	2.98575
UGT1A8	62	28	0	0	28	20	0.176996	0.995746	2.98575
FRYL	47	22	1	1	20	16	0.177102	0.995746	1.79185
ANGEL2	9	6	0	2	4	2	0.177714	0.995746	1.99574
APITD1	9	6	4	0	2	5	0.177714	0.995746	-2.89037
DDI2	9	6	1	0	5	5	0.177714	0.995746	0
DSG2	9	6	0	0	6	3	0.177714	0.995746	2.69027
FGF2	9	6	1	0	5	3	0.177714	0.995746	1.85904
MDK	9	6	2	2	2	3	0.177714	0.995746	-1.03133
NDUFS5	9	6	0	0	6	5	0.177714	0.995746	0.831229
NGFRAP1	9	6	4	1	1	0	0.177714	0.995746	0.693147
ORAI1	9	6	0	0	6	3	0.177714	0.995746	2.69027
PLP2	9	6	1	3	2	4	0.177714	0.995746	-1.99574
PRDX3	9	6	0	0	6	4	0.177714	0.995746	1.72586
RBMS2	9	6	0	0	6	1	0.177714	0.995746	4.76971
RPN1	9	6	1	0	5	3	0.177714	0.995746	1.85904
SGK223	9	6	0	0	6	7	0.177714	0.995746	-0.775464
SLC25A42	9	6	0	0	6	5	0.177714	0.995746	0.831229
SMCR8	9	6	3	3	0	0	0.177714	0.995746	0
STIM1	9	6	0	1	5	2	0.177714	0.995746	2.89037
TACO1	9	6	1	2	3	0	0.177714	0.995746	2.77259
TOM1L1	9	6	0	0	6	8	0.177714	0.995746	-1.50218
NEO1	85	37	0	0	37	25	0.179214	0.995746	3.7753
KATNAL1	30	15	0	0	15	9	0.18074	0.995746	3.44133
KCTD1	30	15	0	2	13	14	0.18074	0.995746	-0.532228
RARG	30	15	2	1	12	8	0.18074	0.995746	2.5264
ZCCHC16	30	15	0	0	15	13	0.18074	0.995746	1.04253
FAM172A	75	33	0	2	31	30	0.182458	0.995746	0.316033
PCDH7	35	17	0	0	17	10	0.184023	0.995746	3.75728
RNF150	35	17	2	1	14	5	0.184023	0.995746	5.94842
BEST4	7	5	2	1	2	3	0.18494	0.995746	-1.03133
C6orf108	7	5	1	0	4	2	0.18494	0.995746	1.99574
CDC25B	7	5	2	0	3	1	0.18494	0.995746	2.07944
CDH7	7	5	0	0	5	2	0.18494	0.995746	2.89037
CHD6	7	5	0	0	5	3	0.18494	0.995746	1.85904
CNTROB	7	5	0	5	0	1	0.18494	0.995746	-0.693147
COX8A	7	5	1	2	2	1	0.18494	0.995746	1.04811
CRTC1	7	5	0	0	5	1	0.18494	0.995746	3.93848
DCUN1D1	7	5	0	0	5	2	0.18494	0.995746	2.89037
DHTKD1	7	5	1	0	4	5	0.18494	0.995746	-0.894632
DMXL2	7	5	1	0	4	1	0.18494	0.995746	3.04385
ELMO1	7	5	0	0	5	2	0.18494	0.995746	2.89037
ENOPH1	7	5	0	1	4	2	0.18494	0.995746	1.99574
FAM129A	7	5	1	0	4	3	0.18494	0.995746	0.96441
HBQ1	7	5	3	2	0	0	0.18494	0.995746	0
HIPK2	7	5	0	1	4	3	0.18494	0.995746	0.96441
LOC440944	7	5	0	0	5	1	0.18494	0.995746	3.93848
MSH2	7	5	0	1	4	2	0.18494	0.995746	1.99574
PIGT	7	5	2	1	2	0	0.18494	0.995746	1.74126
PITPNB	7	5	0	0	5	3	0.18494	0.995746	1.85904
PMS1	7	5	0	0	5	6	0.18494	0.995746	-0.831229
PTCD2	7	5	0	0	5	1	0.18494	0.995746	3.93848
PTPN6	7	5	2	1	2	1	0.18494	0.995746	1.04811
RAD54L	7	5	2	2	1	0	0.18494	0.995746	0.693147
RBP1	7	5	0	0	5	2	0.18494	0.995746	2.89037
SMAGP	7	5	0	0	5	6	0.18494	0.995746	-0.831229
SMPD3	7	5	0	0	5	6	0.18494	0.995746	-0.831229
STAM2	7	5	0	0	5	0	0.18494	0.995746	4.63163
TNR	7	5	0	0	5	5	0.18494	0.995746	0
TSHZ1	7	5	0	0	5	5	0.18494	0.995746	0
TSSC1	7	5	0	1	4	3	0.18494	0.995746	0.96441
TTPAL	7	5	0	0	5	0	0.18494	0.995746	4.63163
ZNF121	7	5	0	0	5	1	0.18494	0.995746	3.93848
ZNF263	7	5	1	2	2	1	0.18494	0.995746	1.04811
RAB8B	132	55	0	3	52	35	0.185181	0.995746	4.21499
EFHC2	40	19	1	0	18	16	0.185941	0.995746	0.927109
PARD3	40	19	0	0	19	12	0.185941	0.995746	3.4559
FUNDC1	23	12	1	1	10	7	0.186038	0.995746	2.05703
SHC1	23	12	4	2	6	6	0.186038	0.995746	0
PPM1E	60	27	0	1	26	16	0.186127	0.995746	4.09068
UGT1A7	60	27	0	0	27	20	0.186127	0.995746	2.64658
TBC1D1	55	25	0	0	25	19	0.186824	0.995746	2.36715
CCDC109A	45	21	0	0	21	21	0.186886	0.995746	0
DCLK1	45	21	0	0	21	16	0.186886	0.995746	2.20364
ARID4B	16	9	2	3	4	7	0.187505	0.995746	-2.50133
CCDC43	16	9	1	1	7	4	0.187505	0.995746	2.50133
ENTHD1	16	9	0	0	9	3	0.187505	0.995746	4.87643
FLT1	16	9	2	0	7	9	0.187505	0.995746	-1.4107
NFIX	16	9	0	0	9	3	0.187505	0.995746	4.87643
NRN1	16	9	0	1	8	1	0.187505	0.995746	6.27189
RASSF1	16	9	0	2	7	3	0.187505	0.995746	3.46574
MPPED2	127	53	1	0	52	52	0.187808	0.995746	0
ACOT8	3	3	1	0	2	2	0.190013	0.995746	0
AFP	3	3	0	0	3	1	0.190013	0.995746	2.07944
ALG6	3	3	0	0	3	4	0.190013	0.995746	-0.96441
APBB1	3	3	0	0	3	1	0.190013	0.995746	2.07944
APTX	3	3	0	0	3	2	0.190013	0.995746	1.03133
ARMC8	3	3	0	1	2	2	0.190013	0.995746	0
ATP6V1B1	3	3	0	0	3	0	0.190013	0.995746	2.77259
ATP6V1H	3	3	1	0	2	1	0.190013	0.995746	1.04811
ATRNL1	3	3	1	0	2	1	0.190013	0.995746	1.04811
BASP1	3	3	0	0	3	1	0.190013	0.995746	2.07944
BLOC1S2	3	3	0	0	3	0	0.190013	0.995746	2.77259
BTBD2	3	3	1	1	1	0	0.190013	0.995746	0.693147
C11orf35	3	3	0	0	3	2	0.190013	0.995746	1.03133
C1QTNF1	3	3	1	1	1	1	0.190013	0.995746	0
C8orf77	3	3	1	2	0	0	0.190013	0.995746	0
CAPN7	3	3	0	1	2	0	0.190013	0.995746	1.74126
CARD10	3	3	0	0	3	2	0.190013	0.995746	1.03133
CCDC88B	3	3	0	0	3	3	0.190013	0.995746	0
CCNT2	3	3	0	0	3	4	0.190013	0.995746	-0.96441
CDX2	3	3	0	2	1	1	0.190013	0.995746	0
CHPF2	3	3	1	2	0	0	0.190013	0.995746	0
CLPTM1	3	3	1	0	2	1	0.190013	0.995746	1.04811
CNO	3	3	0	3	0	0	0.190013	0.995746	0
CYB5D1	3	3	1	0	2	1	0.190013	0.995746	1.04811
DLK2	3	3	0	0	3	2	0.190013	0.995746	1.03133
DNMT3B	3	3	0	0	3	2	0.190013	0.995746	1.03133
DZIP1	3	3	0	0	3	0	0.190013	0.995746	2.77259
EI24	3	3	0	0	3	3	0.190013	0.995746	0
FAM178A	3	3	0	3	0	1	0.190013	0.995746	-0.693147
FBXO21	3	3	0	0	3	1	0.190013	0.995746	2.07944
FOXD2	3	3	2	1	0	0	0.190013	0.995746	0
GAMT	3	3	0	0	3	2	0.190013	0.995746	1.03133
GSG2	3	3	3	0	0	0	0.190013	0.995746	0
HAPLN1	3	3	0	0	3	0	0.190013	0.995746	2.77259
HES4	3	3	0	2	1	1	0.190013	0.995746	0
HMGN1	3	3	1	1	1	3	0.190013	0.995746	-2.07944
HMX2	3	3	0	0	3	0	0.190013	0.995746	2.77259
HOXA13	3	3	1	2	0	0	0.190013	0.995746	0
HOXC8	3	3	1	2	0	2	0.190013	0.995746	-1.74126
INVS	3	3	0	0	3	1	0.190013	0.995746	2.07944
KCTD11	3	3	1	2	0	0	0.190013	0.995746	0
KIAA0319	3	3	0	0	3	1	0.190013	0.995746	2.07944
LIPG	3	3	0	2	1	0	0.190013	0.995746	0.693147
LOC256880	3	3	3	0	0	0	0.190013	0.995746	0
LOC26102	3	3	2	1	0	0	0.190013	0.995746	0
LOC404266	3	3	0	0	3	0	0.190013	0.995746	2.77259
LOC642852	3	3	1	1	1	0	0.190013	0.995746	0.693147
LOC647121	3	3	0	1	2	4	0.190013	0.995746	-1.99574
LRRIQ3	3	3	0	0	3	0	0.190013	0.995746	2.77259
LSM2	3	3	0	0	3	2	0.190013	0.995746	1.03133
MARCH9	3	3	0	1	2	2	0.190013	0.995746	0
MCM3AP	3	3	1	1	1	1	0.190013	0.995746	0
MED12L	3	3	1	0	2	1	0.190013	0.995746	1.04811
MEGF6	3	3	0	0	3	2	0.190013	0.995746	1.03133
MRFAP1L1	3	3	1	2	0	0	0.190013	0.995746	0
MTM1	3	3	0	0	3	1	0.190013	0.995746	2.07944
MTTP	3	3	2	0	1	1	0.190013	0.995746	0
NCRNA00116	3	3	0	0	3	3	0.190013	0.995746	0
NECAP2	3	3	2	0	1	0	0.190013	0.995746	0.693147
NGEF	3	3	1	0	2	0	0.190013	0.995746	1.74126
PCDHGA1	3	3	0	0	3	2	0.190013	0.995746	1.03133
PDIA5	3	3	0	0	3	3	0.190013	0.995746	0
PEX7	3	3	0	0	3	2	0.190013	0.995746	1.03133
PHKA1	3	3	0	1	2	0	0.190013	0.995746	1.74126
PPAPDC2	3	3	2	1	0	0	0.190013	0.995746	0
PPP2R5A	3	3	0	2	1	1	0.190013	0.995746	0
PRPF40B	3	3	1	0	2	0	0.190013	0.995746	1.74126
PTGR1	3	3	0	1	2	1	0.190013	0.995746	1.04811
RAB3A	3	3	0	1	2	1	0.190013	0.995746	1.04811
RAB3IP	3	3	2	0	1	2	0.190013	0.995746	-1.04811
RANBP6	3	3	0	3	0	0	0.190013	0.995746	0
SCARB2	3	3	0	0	3	0	0.190013	0.995746	2.77259
SEC23B	3	3	1	1	1	2	0.190013	0.995746	-1.04811
SENP2	3	3	0	0	3	2	0.190013	0.995746	1.03133
SERP2	3	3	0	0	3	3	0.190013	0.995746	0
SGSH	3	3	1	0	2	0	0.190013	0.995746	1.74126
SLC25A21	3	3	0	0	3	1	0.190013	0.995746	2.07944
SLC35A2	3	3	0	0	3	1	0.190013	0.995746	2.07944
SSR1	3	3	0	0	3	2	0.190013	0.995746	1.03133
TAB3	3	3	0	0	3	2	0.190013	0.995746	1.03133
TG	3	3	0	1	2	3	0.190013	0.995746	-1.03133
THAP1	3	3	1	0	2	3	0.190013	0.995746	-1.03133
TRAF7	3	3	0	0	3	0	0.190013	0.995746	2.77259
TRIM27	3	3	1	1	1	1	0.190013	0.995746	0
TSC22D4	3	3	0	1	2	0	0.190013	0.995746	1.74126
UBE3B	3	3	0	3	0	0	0.190013	0.995746	0
VTCN1	3	3	0	0	3	0	0.190013	0.995746	2.77259
ZFR2	3	3	0	0	3	0	0.190013	0.995746	2.77259
ZNF280B	3	3	0	0	3	3	0.190013	0.995746	0
ZNF323	3	3	0	0	3	3	0.190013	0.995746	0
ZNF326	3	3	0	0	3	1	0.190013	0.995746	2.07944
ZNF605	3	3	0	0	3	0	0.190013	0.995746	2.77259
AIMP1	5	4	0	0	4	2	0.190232	0.995746	1.99574
ANXA7	5	4	0	0	4	3	0.190232	0.995746	0.96441
ATXN7L2	5	4	0	0	4	5	0.190232	0.995746	-0.894632
C15orf37	5	4	3	1	0	0	0.190232	0.995746	0
C17orf95	5	4	0	1	3	2	0.190232	0.995746	1.03133
C1orf84	5	4	0	0	4	0	0.190232	0.995746	3.737
C2orf16	5	4	3	1	0	0	0.190232	0.995746	0
C6orf141	5	4	3	1	0	0	0.190232	0.995746	0
CCNDBP1	5	4	2	0	2	2	0.190232	0.995746	0
CHKA	5	4	0	0	4	2	0.190232	0.995746	1.99574
CISD1	5	4	0	0	4	1	0.190232	0.995746	3.04385
CNN3	5	4	1	1	2	0	0.190232	0.995746	1.74126
COX7B	5	4	0	0	4	2	0.190232	0.995746	1.99574
CSDA	5	4	0	0	4	1	0.190232	0.995746	3.04385
DPP9	5	4	0	1	3	2	0.190232	0.995746	1.03133
EXPH5	5	4	0	0	4	1	0.190232	0.995746	3.04385
FAM5C	5	4	0	0	4	2	0.190232	0.995746	1.99574
FUZ	5	4	1	2	1	2	0.190232	0.995746	-1.04811
FZD7	5	4	3	1	0	0	0.190232	0.995746	0
GHDC	5	4	1	0	3	0	0.190232	0.995746	2.77259
GIT2	5	4	0	1	3	3	0.190232	0.995746	0
HMGN4	5	4	0	0	4	2	0.190232	0.995746	1.99574
HYAL3	5	4	2	0	2	2	0.190232	0.995746	0
KIF26B	5	4	1	0	3	0	0.190232	0.995746	2.77259
KRT8	5	4	0	0	4	3	0.190232	0.995746	0.96441
LIPT1	5	4	1	0	3	0	0.190232	0.995746	2.77259
LOC283050	5	4	0	0	4	2	0.190232	0.995746	1.99574
LZTR1	5	4	0	0	4	0	0.190232	0.995746	3.737
MARK2	5	4	0	0	4	2	0.190232	0.995746	1.99574
MDS2	5	4	0	0	4	6	0.190232	0.995746	-1.72586
METTL4	5	4	1	0	3	3	0.190232	0.995746	0
MT2A	5	4	1	2	1	5	0.190232	0.995746	-3.93848
MYLIP	5	4	0	0	4	2	0.190232	0.995746	1.99574
NCDN	5	4	3	0	1	2	0.190232	0.995746	-1.04811
NEK4	5	4	1	0	3	2	0.190232	0.995746	1.03133
OSTBETA	5	4	0	1	3	3	0.190232	0.995746	0
PARP8	5	4	0	0	4	3	0.190232	0.995746	0.96441
PEX2	5	4	1	0	3	3	0.190232	0.995746	0
PIGQ	5	4	0	1	3	1	0.190232	0.995746	2.07944
PPP1R1B	5	4	1	3	0	0	0.190232	0.995746	0
RBPMS2	5	4	0	1	3	3	0.190232	0.995746	0
REEP5	5	4	0	0	4	1	0.190232	0.995746	3.04385
RNF145	5	4	0	0	4	4	0.190232	0.995746	0
SFXN5	5	4	1	0	3	1	0.190232	0.995746	2.07944
SLC27A2	5	4	0	0	4	0	0.190232	0.995746	3.737
SLC5A10	5	4	0	0	4	2	0.190232	0.995746	1.99574
STON2	5	4	0	0	4	3	0.190232	0.995746	0.96441
TMEM102	5	4	1	3	0	0	0.190232	0.995746	0
TMEM175	5	4	0	0	4	3	0.190232	0.995746	0.96441
TMEM60	5	4	0	0	4	3	0.190232	0.995746	0.96441
TRIB3	5	4	0	0	4	2	0.190232	0.995746	1.99574
TTPA	5	4	1	0	3	2	0.190232	0.995746	1.03133
UBIAD1	5	4	1	3	0	3	0.190232	0.995746	-2.77259
VILL	5	4	1	0	3	1	0.190232	0.995746	2.07944
VIM	5	4	0	3	1	4	0.190232	0.995746	-3.04385
WDR61	5	4	0	0	4	0	0.190232	0.995746	3.737
WDR87	5	4	1	1	2	1	0.190232	0.995746	1.04811
ZCCHC14	5	4	0	1	3	5	0.190232	0.995746	-1.85904
ZIC2	5	4	2	0	2	0	0.190232	0.995746	1.74126
ZNF517	5	4	0	0	4	2	0.190232	0.995746	1.99574
ZNF529	5	4	0	0	4	2	0.190232	0.995746	1.99574
MAML2	109	46	0	0	46	44	0.190476	0.995746	0.480356
AAA1	28	14	0	0	14	10	0.191561	0.995746	2.2847
PLEKHG4	28	14	9	4	1	0	0.191561	0.995746	0.693147
SMG1	28	14	6	8	0	2	0.191561	0.995746	-1.74126
GNAT3	91	39	0	0	39	35	0.191962	0.995746	1.10543
GREB1L	138	57	0	0	57	54	0.194497	0.995746	0.618163
ATXN7L1	33	16	0	1	15	8	0.194838	0.995746	4.12532
SUGT1P1	33	16	1	0	15	17	0.194838	0.995746	-0.962279
FIGN	38	18	0	1	17	8	0.196614	0.995746	5.0876
TASP1	38	18	0	0	18	14	0.196614	0.995746	1.92771
UBE2E2	38	18	0	0	18	17	0.196614	0.995746	0.45513
DYNLL1	21	11	0	0	11	7	0.197506	0.995746	2.66997
ERBB2	21	11	4	1	6	12	0.197506	0.995746	-4.02858
FILIP1L	21	11	1	0	10	13	0.197506	0.995746	-1.75247
FNDC3B	21	11	0	0	11	9	0.197506	0.995746	1.25928
GMEB2	21	11	0	0	11	8	0.197506	0.995746	1.94326
KIF15	21	11	1	0	10	7	0.197506	0.995746	2.05703
BAT4	14	8	4	3	1	1	0.198885	0.995746	0
C3orf59	14	8	0	0	8	5	0.198885	0.995746	2.33341
C6orf142	14	8	0	0	8	8	0.198885	0.995746	0
DPPA4	14	8	2	0	6	5	0.198885	0.995746	0.831229
FAM13B	14	8	0	0	8	8	0.198885	0.995746	0
FAT4	14	8	0	0	8	5	0.198885	0.995746	2.33341
LMNA	14	8	1	0	7	5	0.198885	0.995746	1.60669
NUDCD2	14	8	1	0	7	0	0.198885	0.995746	6.23832
RAD54L2	14	8	1	0	7	3	0.198885	0.995746	3.46574
TATDN1	14	8	0	0	8	3	0.198885	0.995746	4.19245
TMEM222	14	8	0	0	8	2	0.198885	0.995746	5.22378
TMEM80	14	8	0	0	8	9	0.198885	0.995746	-0.683985
USP6NL	14	8	0	0	8	6	0.198885	0.995746	1.50218
ZCCHC6	14	8	1	2	5	2	0.198885	0.995746	2.89037
DTNA	26	13	0	0	13	11	0.203288	0.995746	1.13953
IRF8	26	13	1	0	12	10	0.203288	0.995746	1.19609
LOC653391	26	13	0	0	13	5	0.203288	0.995746	5.4162
LRTOMT	26	13	0	0	13	6	0.203288	0.995746	4.58497
UTRN	197	79	1	0	78	46	0.205167	0.995746	6.15805
FAM186A	56	25	1	1	23	17	0.206084	0.995746	2.51862
LMO3	31	15	1	0	14	13	0.206515	0.995746	0.532228
SMARCD3	31	15	1	1	13	11	0.206515	0.995746	1.13953
RALGAPA2	36	17	0	0	17	19	0.208091	0.995746	-0.894706
VPS29	36	17	0	1	16	21	0.208091	0.995746	-2.20364
UST	46	21	0	0	21	17	0.208236	0.995746	1.73166
SIL1	74	32	0	0	32	36	0.208253	0.995746	-1.17315
GULP1	41	19	0	1	18	16	0.208553	0.995746	0.927109
SLC4A8	41	19	1	0	18	12	0.208553	0.995746	3.01632
ARFGEF2	19	10	2	0	8	3	0.210016	0.995746	4.19245
GNAQ	19	10	0	0	10	8	0.210016	0.995746	1.33032
HIAT1	19	10	0	0	10	4	0.210016	0.995746	4.55836
MYO1D	19	10	0	0	10	3	0.210016	0.995746	5.52277
PRKCB	19	10	1	0	9	8	0.210016	0.995746	0.683985
AP3S2	12	7	0	0	7	3	0.211208	0.995746	3.46574
CPEB2	12	7	0	2	5	2	0.211208	0.995746	2.89037
DIABLO	12	7	1	2	4	4	0.211208	0.995746	0
HTRA1	12	7	1	0	6	3	0.211208	0.995746	2.69027
IDE	12	7	0	0	7	9	0.211208	0.995746	-1.4107
KPNA1	12	7	2	1	4	5	0.211208	0.995746	-0.894632
MRM1	12	7	0	4	3	2	0.211208	0.995746	1.03133
PLB1	12	7	0	0	7	1	0.211208	0.995746	5.54518
RAB3GAP1	12	7	0	2	5	1	0.211208	0.995746	3.93848
SGSM3	12	7	0	0	7	3	0.211208	0.995746	3.46574
SLC6A3	12	7	0	0	7	3	0.211208	0.995746	3.46574
SNX7	12	7	0	1	6	6	0.211208	0.995746	0
STRN3	12	7	3	1	3	9	0.211208	0.995746	-4.87643
STXBP5	12	7	0	0	7	2	0.211208	0.995746	4.49707
ZBTB45	12	7	2	0	5	3	0.211208	0.995746	1.85904
SSH2	82	35	0	0	35	33	0.212749	0.995746	0.586296
EFCAB2	24	12	1	0	11	14	0.21605	0.995746	-1.67176
METTL7A	24	12	5	0	7	6	0.21605	0.995746	0.775464
NAV2	24	12	0	0	12	8	0.21605	0.995746	2.5264
CUL4B	29	14	3	1	10	9	0.219162	0.995746	0.646333
SCAND2	29	14	4	5	5	8	0.219162	0.995746	-2.33341
TFAP2C	44	20	4	5	11	16	0.219891	0.995746	-2.67236
C19orf54	34	16	4	7	5	0	0.220462	0.995746	4.63163
LRRIQ4	34	16	1	5	10	8	0.220462	0.995746	1.33032
ATAD1	39	18	2	1	15	17	0.220578	0.995746	-0.962279
LIN28B	39	18	0	2	16	18	0.220578	0.995746	-0.927109
NEGR1	106	44	0	0	44	43	0.221879	0.995746	0.246107
ACCN1	17	9	0	0	9	5	0.223738	0.995746	3.01739
FAM20A	17	9	0	1	8	5	0.223738	0.995746	2.33341
LRRC45	17	9	3	3	3	5	0.223738	0.995746	-1.85904
PLD5	17	9	0	0	9	6	0.223738	0.995746	2.18616
PREP	17	9	0	0	9	5	0.223738	0.995746	3.01739
RAD23A	17	9	0	0	9	6	0.223738	0.995746	2.18616
ADAMTS3	10	6	1	0	5	6	0.224566	0.995746	-0.831229
ADRA1A	10	6	0	0	6	2	0.224566	0.995746	3.7216
ATP6V0A1	10	6	0	3	3	5	0.224566	0.995746	-1.85904
C1orf156	10	6	2	2	2	0	0.224566	0.995746	1.74126
C5orf28	10	6	0	0	6	4	0.224566	0.995746	1.72586
CNNM4	10	6	0	2	4	5	0.224566	0.995746	-0.894632
CP	10	6	0	0	6	5	0.224566	0.995746	0.831229
CSNK2A1	10	6	0	0	6	1	0.224566	0.995746	4.76971
DENND2A	10	6	0	0	6	3	0.224566	0.995746	2.69027
EFHC1	10	6	0	0	6	0	0.224566	0.995746	5.46286
FKBP10	10	6	3	0	3	9	0.224566	0.995746	-4.87643
G6PC3	10	6	1	1	4	2	0.224566	0.995746	1.99574
LRRC24	10	6	0	5	1	3	0.224566	0.995746	-2.07944
MDP1	10	6	2	3	1	4	0.224566	0.995746	-3.04385
ME2	10	6	0	0	6	8	0.224566	0.995746	-1.50218
NUCKS1	10	6	0	3	3	1	0.224566	0.995746	2.07944
PTPRS	10	6	1	0	5	4	0.224566	0.995746	0.894632
RHBDL3	10	6	0	0	6	2	0.224566	0.995746	3.7216
RTDR1	10	6	0	0	6	4	0.224566	0.995746	1.72586
SHF	10	6	3	1	2	3	0.224566	0.995746	-1.03133
SULF2	10	6	0	0	6	5	0.224566	0.995746	0.831229
TMEM182	10	6	0	0	6	8	0.224566	0.995746	-1.50218
UBE2W	10	6	0	0	6	1	0.224566	0.995746	4.76971
ZNF358	10	6	0	0	6	0	0.224566	0.995746	5.46286
ZNF668	10	6	4	1	1	0	0.224566	0.995746	0.693147
MEG3	52	23	2	2	19	9	0.228601	0.995746	5.29832
USP14	52	23	1	0	22	28	0.228601	0.995746	-2.17466
DENND1B	22	11	0	0	11	12	0.230002	0.995746	-0.583143
FADS1	22	11	0	1	10	15	0.230002	0.995746	-2.795
SLC35D2	22	11	0	0	11	6	0.230002	0.995746	3.44544
TBX5	22	11	3	2	6	11	0.230002	0.995746	-3.44544
TMEM26	47	21	5	8	8	16	0.230676	0.995746	-4.61562
HIBADH	133	54	0	0	54	40	0.231759	0.995746	3.27218
CASC2	42	19	0	1	18	8	0.23237	0.995746	5.54273
SEPT6	42	19	2	6	11	8	0.23237	0.995746	1.94326
TRIM71	42	19	0	0	19	14	0.23237	0.995746	2.36728
UACA	141	57	1	6	50	29	0.232615	0.995746	5.61368
C9orf5	27	13	0	1	12	10	0.232908	0.995746	1.19609
HCRTR2	27	13	0	0	13	8	0.232908	0.995746	3.08279
PRKCA	27	13	0	0	13	7	0.232908	0.995746	3.8095
TMTC1	27	13	0	0	13	3	0.232908	0.995746	7.27524
CASZ1	37	17	1	0	16	10	0.23351	0.995746	3.2853
LOC100216545	32	15	9	6	0	0	0.233833	0.995746	0
DPP10	256	100	0	0	100	94	0.234418	0.995746	0.810135
C10orf140	120	49	6	5	38	30	0.234569	0.995746	2.35075
AR	60	26	2	4	20	12	0.235181	0.995746	3.88107
ANGPT1	73	31	0	1	30	32	0.236679	0.995746	-0.625115
PTCH1	115	47	2	1	44	43	0.238584	0.995746	0.246107
DOPEY2	15	8	2	2	4	4	0.238892	0.995746	0
HSDL1	15	8	0	0	8	5	0.238892	0.995746	2.33341
MGC3771	15	8	0	1	7	4	0.238892	0.995746	2.50133
MRRF	15	8	0	0	8	15	0.238892	0.995746	-4.12532
PLEKHG5	15	8	1	2	5	11	0.238892	0.995746	-4.27667
RNF214	15	8	0	0	8	2	0.238892	0.995746	5.22378
SULT2B1	15	8	0	0	8	3	0.238892	0.995746	4.19245
ACBD6	8	5	0	1	4	4	0.239019	0.995746	0
ADPGK	8	5	0	0	5	6	0.239019	0.995746	-0.831229
BCAS4	8	5	1	0	4	2	0.239019	0.995746	1.99574
C16orf61	8	5	1	0	4	5	0.239019	0.995746	-0.894632
C19orf45	8	5	0	1	4	2	0.239019	0.995746	1.99574
C1orf123	8	5	0	0	5	1	0.239019	0.995746	3.93848
CCDC40	8	5	1	1	3	2	0.239019	0.995746	1.03133
CMTM7	8	5	0	0	5	4	0.239019	0.995746	0.894632
CREB5	8	5	0	0	5	4	0.239019	0.995746	0.894632
DDX21	8	5	0	0	5	2	0.239019	0.995746	2.89037
EXD1	8	5	3	1	1	1	0.239019	0.995746	0
FAM195A	8	5	0	1	4	7	0.239019	0.995746	-2.50133
FASTKD3	8	5	1	2	2	1	0.239019	0.995746	1.04811
ISLR2	8	5	4	1	0	0	0.239019	0.995746	0
KIAA0664	8	5	0	0	5	3	0.239019	0.995746	1.85904
KLHDC2	8	5	0	0	5	2	0.239019	0.995746	2.89037
LAPTM5	8	5	0	0	5	5	0.239019	0.995746	0
LEF1	8	5	1	0	4	0	0.239019	0.995746	3.737
LHFPL2	8	5	1	0	4	2	0.239019	0.995746	1.99574
LNPEP	8	5	0	0	5	4	0.239019	0.995746	0.894632
LOC100189589	8	5	3	2	0	0	0.239019	0.995746	0
LOC255512	8	5	3	2	0	0	0.239019	0.995746	0
LPAR4	8	5	0	1	4	3	0.239019	0.995746	0.96441
LPPR5	8	5	0	0	5	2	0.239019	0.995746	2.89037
MAN1C1	8	5	0	0	5	2	0.239019	0.995746	2.89037
MFSD5	8	5	0	4	1	0	0.239019	0.995746	0.693147
PLD3	8	5	0	0	5	2	0.239019	0.995746	2.89037
PPP2R3A	8	5	0	1	4	2	0.239019	0.995746	1.99574
PTBP2	8	5	0	1	4	5	0.239019	0.995746	-0.894632
SPAG6	8	5	0	0	5	4	0.239019	0.995746	0.894632
TLE4	8	5	0	0	5	5	0.239019	0.995746	0
TPRXL	8	5	0	0	5	1	0.239019	0.995746	3.93848
TSPAN3	8	5	0	0	5	7	0.239019	0.995746	-1.60669
LRRC16A	50	22	0	0	22	23	0.240953	0.995746	-0.387655
ADK	249	97	0	1	96	76	0.245189	0.995746	2.97099
ATG7	20	10	0	0	10	9	0.245342	0.995746	0.646333
CCDC50	20	10	1	1	8	10	0.245342	0.995746	-1.33032
CDKL5	20	10	0	0	10	9	0.245342	0.995746	0.646333
GALNT1	20	10	2	2	6	9	0.245342	0.995746	-2.18616
LOC100131193	20	10	2	5	3	5	0.245342	0.995746	-1.85904
PHF12	20	10	0	3	7	7	0.245342	0.995746	0
PPFIA3	20	10	1	1	8	4	0.245342	0.995746	3.22804
STAT6	20	10	3	1	6	5	0.245342	0.995746	0.831229
PTPRG	105	43	1	2	40	45	0.246954	0.995746	-1.25208
WWTR1	105	43	1	3	39	39	0.246954	0.995746	0
MYOM1	84	35	0	0	35	23	0.24716	0.995746	3.95527
MET	58	25	0	0	25	21	0.247297	0.995746	1.53019
CBX5	35	16	0	0	16	13	0.247451	0.995746	1.53283
CAPRIN1	25	12	2	0	10	9	0.247914	0.995746	0.646333
HDGFRP3	25	12	1	1	10	8	0.247914	0.995746	1.33032
CRISPLD1	30	14	1	1	12	10	0.24833	0.995746	1.19609
PPP1R1C	30	14	1	0	13	12	0.24833	0.995746	0.556387
SH3BGRL	30	14	0	0	14	8	0.24833	0.995746	3.61502
SHROOM3	129	52	6	6	40	35	0.249952	0.995746	1.36913
BAZ1B	53	23	2	0	21	20	0.250761	0.995746	0.411784
CYP7B1	66	28	0	0	28	23	0.25206	0.995746	1.787
LGR4	108	44	0	1	43	45	0.252696	0.995746	-0.488213
ACTR3B	6	4	0	0	4	2	0.254495	0.995746	1.99574
ALAS1	6	4	1	1	2	1	0.254495	0.995746	1.04811
ANKDD1A	6	4	0	0	4	2	0.254495	0.995746	1.99574
C11orf83	6	4	1	1	2	0	0.254495	0.995746	1.74126
[truncated: 8,759 more rows]
