# Supplementary material for: R-spondins engage heparan sulfate proteoglycans to potentiate WNT signaling
Source: eLife. 2020 May 20;9:e54469. doi: 10.7554/eLife.54469 (PMC7239654; doi:10.7554/eLife.54469)
Supplement: Supplementary file 5. — Genes used to generate the heat map in Figure 6C, comparing the RSPO1 screen in WT HAP1-7TGP cells (Figure 6A) and the RSPO3 screen in LGR4/5/6KO cells (Figure 6B), are shown. Genes enriched for inactivating GT insertions (FDR-corrected p-value<0.01) in at least one of the two screens are shown, and the FDR-corrected p-value and IGTIOB score for each gene in each screen is indicated. Genes are shown in the same order as in the heat map in Figure 6C, clustered based on their IGTIOB scores (see Materials and methods for details). [file elife-54469-supp5.xlsx]

## Sheet: IGTIOB in RSPO1 & RSPO3 screens
Screen:	RSPO1 in HAP1-7TGP		RSPO3 in LGR4/5/6KO
Gene	FDR-corrected p-value	IGTIOB score	FDR-corrected p-value	IGTIOB score
CNOT2	2.54309e-33	21.5869	6.77447e-21	23.2936
LRP6	1.44197e-34	18.0914	8.09794e-21	14.7139
DOT1L	4.47956e-23	16.5358	0.00105607	9.61823
CREBBP	3.26603e-05	13.2756	4.33477e-09	17.4473
BCL9	1.82391e-05	10.2504	1.07946e-11	15.5485
PIGS	1.19988e-08	8.8388	5.11472e-07	15.9962
RNF146	0.00242039	7.64902	0.000163662	10.8875
WDR20	2.66972e-13	12.7213	6.60007e-10	6.62423
PIGP	4.18567e-12	11.8658	8.09067e-08	11.0397
PIGL	1.21845e-09	11.0904	0.00107007	10.3164
RHOA	2.43894e-05	10.5801	0.00768261	10.7665
AXIN2	2.65204e-31	10.0263	3.81103e-09	9.93963
CTNNB1	3.27118e-12	12.1754	2.17315e-05	8.30657
KEAP1	7.30696e-11	11.7512	0.00549456	8.18856
NPRL3	2.0542e-06	11.3875	0.125791	9.63551
PIGU	1.20876e-09	10.451	0.000311203	8.70924
MPDU1	2.06761e-05	8.71729	0.995746	5.1713
SPEN	5.26838e-06	7.73173	0.995746	5.19515
PIGX	0.00242039	6.95587	0.30491	3.46574
MLL	0.000263669	6.71885	0.871863	4.49707
GPC4	7.51073e-05	6.40619	1.09561e-06	5.95763
MECOM	0.000102474	6.5436	0.00267944	6.81009
CNOT3	1.09284e-14	7.98296	5.53815e-07	0.646333
SFRS1	1.21845e-09	7.0449	0.995746	-4.87643
TFAP4	1.3187e-19	2.10342	0.239777	-3.95617
ERF	4.96875e-14	4.86902	0.239777	0.670214
HSD17B1	0.0051102	3.737	1	1.74126
PIGT	0.0051102	3.737	0.995746	1.74126
UNK	0.00975445	5.01593	0.995746	2.80145
CSNK1D	0.000432171	3.25312	0.995746	3.66372
PIGQ	0.00772587	1.50218	0.995746	2.07944
BRD9	1.16602e-05	1.60669	0.219658	5.22378
SETD1B	9.49178e-12	-0.962279	1.07946e-11	4.7776
RAD54L	0.00955973	0	0.995746	0.693147
MALAT1	0.00498618	0	0.0137215	0
FZD5	7.19172e-06	-1.74126	0.0241349	0
GPAA1	1.42023e-06	-0.894632	0.995746	-3.737
NEUROG2	1.42023e-06	-1.74126	0.995746	-2.07944
DPM3	0.00242039	-1.04811	5.90559e-06	-1.74126
LGR4	4.35234e-31	18.1935	0.995746	-0.488213
